# Supplementary material for: Catalytic asymmetric formal [3+2] cycloaddition of isatogens with azlactones to construct indolin-3-one derivatives
Source: Royal Society of Chemistry journal article supplement (doi:10.1039/d0cc06418a), 2020-11-21
Supplement: d0cc06418a1.pdf [file d0cc06418a1.pdf]

## Electronic Supporting Information

### Catalytic asymmetric formal [3+2] cycloaddition of isatogens with azlactones to construct indolin-3-one derivatives

Lihua Xie, Yi Li, Shunxi Dong, Xiaoming Feng, Xiaohua Liu\*<sup>a</sup>

Key Laboratory of Green Chemistry & Technology, Ministry of Education, College of Chemistry, Sichuan University, Chengdu 610064, China.

E-mail: liuxh@scu.edu.cn

#### Table of Contents

|                                                                                      |     |
|--------------------------------------------------------------------------------------|-----|
| 1. General information .....                                                         | S2  |
| 2. Substrates synthesis .....                                                        | S2  |
| 3. Optimization of the reaction conditions .....                                     | S5  |
| 4. Substrate scope .....                                                             | S9  |
| 5. Typical procedure for the cascade reaction .....                                  | S11 |
| 6. The analytical and spectral characterization data of the products .....           | S13 |
| 7. Crystallographic data and analysis results of 2D NMR spectra for <b>3ca</b> ..... | S41 |
| 8. NMR spectra .....                                                                 | S44 |
| 9. References .....                                                                  | S75 |

## 1. General information

$^1\text{H}$  NMR spectra were recorded on Bruker ASCEND<sup>TM</sup> operating at 400 MHz. Chemical shifts were reported in ppm from tetramethylsilane with the solvent resonance as the internal standard [ $\text{CDCl}_3$ ,  $\delta = 7.26$ ], MeOD,  $\delta = 2.64$ ,  $(\text{CD}_3)_2\text{CO}$ ,  $\delta = 2.05$ ,  $(\text{CD}_3)_2\text{SO}$ ,  $\delta = 2.50$ ]. Spectra were reported as follows: chemical shift ( $\delta$  ppm), multiplicity (s = singlet, d = doublet, t = triplet, q = quartet, m = multiplet, dd = doublet of doublets, dt = doublet of triplets), coupling constants (Hz), integration and assignment. NMR characterization data were collected on Bruker ASCEND<sup>TM</sup> operating at 400 MHz for 101 MHz for  $^{13}\text{C}\{^1\text{H}\}$  NMR (with complete proton decoupling), and 376 MHz for  $^{19}\text{F}\{^1\text{H}\}$  NMR (with complete proton decoupling). Chemical shifts are reported in ppm from the tetramethylsilane with the solvent resonance as internal standard. Enantiomeric excesses (ee) were determined by Ultra Performance Convergence Chromatography (UPCC) on systems of an Agilent 1100 or 1200 series with chiral stationary phases (Chiralpak OX, Chiralpak OJ, Chiralpak ODH, Chiralpak AD) from Chiral Technologies Inc in the experimental procedures at 35 °C. Optical rotations were reported as follows:  $[\alpha]_{\text{D}}^{\text{T}}$  (c: g/100 mL, in solvent). The unit is  $\text{deg}\cdot\text{cm}^3\cdot\text{g}^{-1}\cdot\text{dm}^{-1}$ . IR spectra were recorded on Bruker Tensor II spectrometer with Plantium ATR accessory, and the wave numbers of the absorption peaks are given in  $\text{cm}^{-1}$ . High resolution mass spectra (HRMS) analyses were recorded on a Thermo Scientific LTQ Orbitrap XL with positive ion mode. HRMS was recorded on a commercial apparatus (FTMS+c ESI).

All catalytic reactions were run in dried glassware. THF, toluene and diethyl ether ( $\text{Et}_2\text{O}$ ) were distilled from sodium benzophenone ketyl before use. Ethyl acetate, DCM was distilled over  $\text{CaH}_2$  before use. The experiments requiring substrates azlactones<sup>1</sup>, isatogens<sup>2-5</sup>, chiral guanidines<sup>6</sup> were synthesized according to known procedures. The starting materials were purchased from Accela, 3A chemicals, Aladdin, Adamas, Acros, Aldrich or Ark, and used without further purification. Reactions were monitored using thin-layer chromatography (TLC) on GF254 silica gel. Visualization of the developed plates was performed under UV light (254 nm) or using iodine, cobalt thiocyanate or  $\text{KMnO}_4$ . The products were purified by flash column chromatography with Silicycle 300-400 mesh silica gel or with Aluminum oxide (neutral) 100-200 mesh.

## 2. Substrates synthesis

### 2.1 General procedure for the synthesis of azlactones according to the literature procedure.<sup>1</sup>

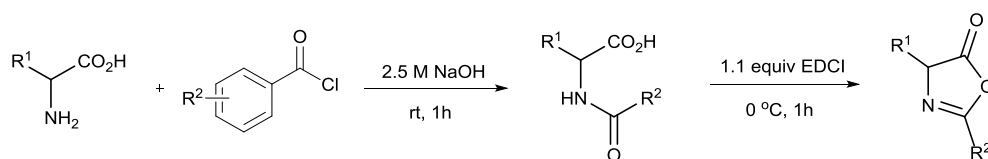

## 2.2 General procedure for the synthesis of isotogens

**a) Method A:** Isatogens were prepared according to the literature procedure.<sup>2</sup>

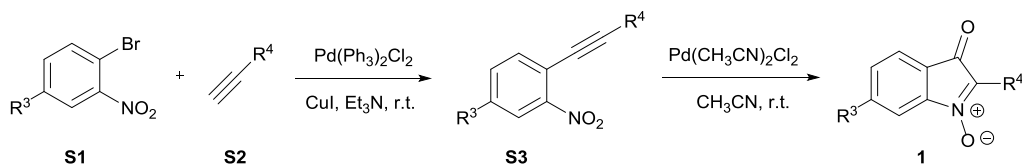

$R^3 = \text{H, F, Cl, Br, Me, } R^4 = \text{cyclopropyl, } i\text{-Pr, cyclohexyl, } t\text{-Bu, } n\text{-C}_4\text{H}_9, \text{Ph};$

$R^3 = \text{Cl, } R^4 = i\text{-Pr, cyclopentyl, cyclohexyl, } i\text{-Bu, } t\text{-Bu, } n\text{-C}_4\text{H}_9, n\text{-C}_6\text{H}_{13}, n\text{-C}_{10}\text{H}_{21}, \text{Ph, Pyridyl, 2-thienyl, (CH}_2)_2\text{CH}_2\text{Cl, (CH}_2)_2\text{CH}_2\text{Ph, (CH}_2)_3\text{CH}_2\text{OH, (CH}_2)_4\text{CCH, (CH}_2)_3\text{CO}_2\text{Me.}$

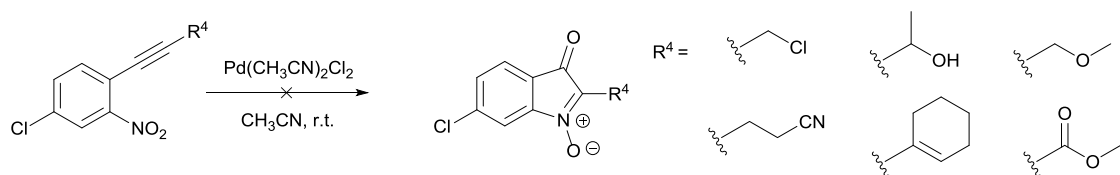

**General Procedure for the Sonogashira Coupling:** Pd(PPh<sub>3</sub>)<sub>2</sub>Cl<sub>2</sub> (0.25 mmol) was added to a solution of aryl bromide **S1** (5.0 mmol) in Et<sub>3</sub>N (6 mL), after stirring for 15 min at room temperature, **S2** (5.5 mmol) and CuI were added, and the mixture was stirred at room temperature for 6 h. Then, washed with saturated NH<sub>4</sub>Cl solution, the aqueous layer was extracted with ethyl acetate, and the combined organic mixtures were washed with brine, dried over anhydrous Na<sub>2</sub>SO<sub>4</sub>, filtered (solvent: DCM), and concentrated under reduced pressure. And then the mixture was purified by column chromatography (petroleum ether/ethyl acetate = 20/1, v/v) to afford the compound **S3** (yellow oil, 80-95% yield).

**General Procedure for the Cycloisomerization:** Pd(CH<sub>3</sub>CN)<sub>2</sub>Cl<sub>2</sub> (0.025 mmol, 5 mol-%) was added to a solution of alkyne **S3** (0.5 mmol) in CH<sub>3</sub>CN (15 mL), and the mixture was stirred under argon at room temperature for 4 h. The reaction mixture was concentrated, and then the mixture was purified by column chromatography (petroleum ether/ethyl acetate = 20/1, v/v or petroleum ether/diethyl ether = 20/1, v/v) to afford the compound **1** (orange or yellow solid, 20-80% yield).

**b) Method B:** Isatogens were prepared according to the literature procedure.<sup>3</sup>

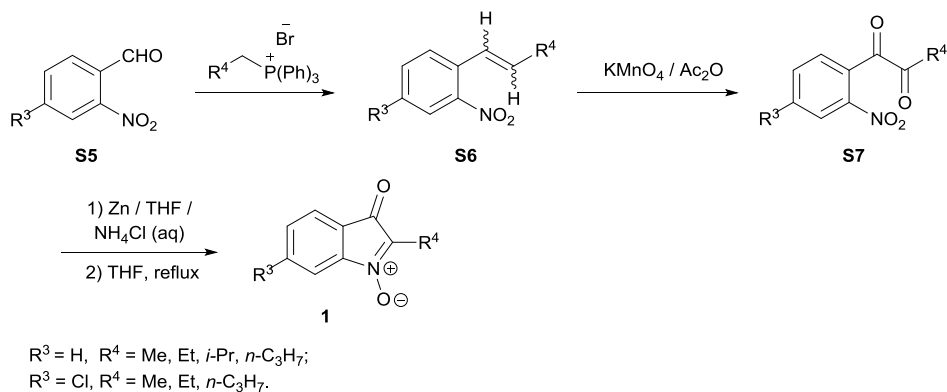

**General Synthetic Procedure for Alkene Compound S6:** To a solution of ortho-nitro benzaldehyde **S5** (10.7 mmol) in dichloromethane (140 mL), was added the appropriate phosphonium salt (14.6 mmol), aq. NaOH solution (50%, 12.8 mmol) and tetrabutylammonium chloride (0.54 mol). The mixture was stirred at room temperature until complete disappearance of the starting product. It was then extracted by dichloromethane; the organic phase was washed with brine, dried over anhydrous  $\text{MgSO}_4$  and concentrated under reduced pressure. The mixture was purified by column chromatography (petroleum ether/ethyl acetate = 10/1, v/v) to afford a mixture of *E/Z*-diastereoisomers **S6** (yellow oil, 70-90% yield)

**General Synthetic Procedure for Diketone Compound S7:** To a solution of alkene **S6** (4.8 mmol) in acetic anhydride (32 ml), was added (at 0–5°C with stirring)  $\text{KMnO}_4$  (19.2 mmol) in five portions over a period of 20 min. After completion of the addition the mixture was stirred in a cooling bath for 2 h. Then the reaction was stopped by addition of ethyl acetate/cyclohexane (1:1) (32 mL) and an ice cold solution of sodium dithionite 10%. After stirring in the cooling bath for several minutes the mixture was extracted by dichloromethane, and the organic phase was washed by an aqueous NaOH solution, water and dried over anhydrous  $\text{MgSO}_4$ . After evaporation of the solvent, the mixture was purified by column chromatography (petroleum ether/ethyl acetate = 3/1, v/v) to afford the compound **S7** (yellow oil, 40-60% yield).

**General Synthetic Procedure for Indolone-1-oxide Analogue 1:** To a solution of **S7** (0.59 mmol) in THF (10 ml) was added a 10% aqueous solution of  $\text{NH}_4\text{Cl}$  (11 ml) and Zn (2.50 mmol). After 20 min of stirring at r.t., the mixture was filtered and the two liquid phases separated. The organic phase was dried over  $\text{Na}_2\text{SO}_4$  and concentrated under vacuum. The residue was dissolved in THF or dichloromethane (10 ml) and heated under reflux until complete disappearance of the hydroxylamine intermediate. After evaporation of the solvent, the mixture was purified by column chromatography (petroleum ether/ethyl acetate = 5/1, v/v) to afford the compound **1** (yellow oil, 20-30% yield).

c) **Method C:** Isatogens were prepared according to the literature procedure.<sup>4</sup>

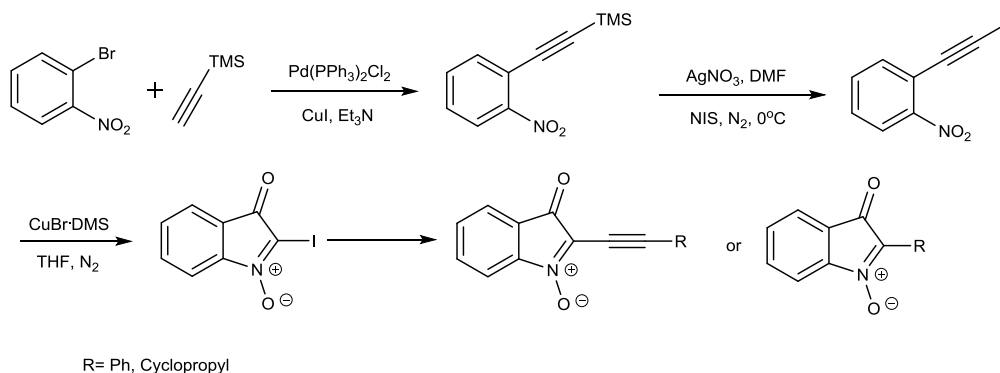

**d) Method D:** Isatogen was prepared according to the literature procedure.<sup>5</sup>

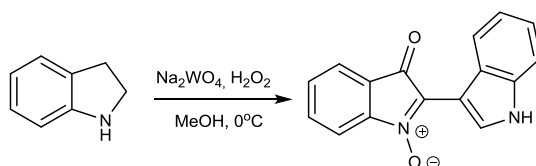

### 2.3 General procedure for the synthesis of racemic products 3

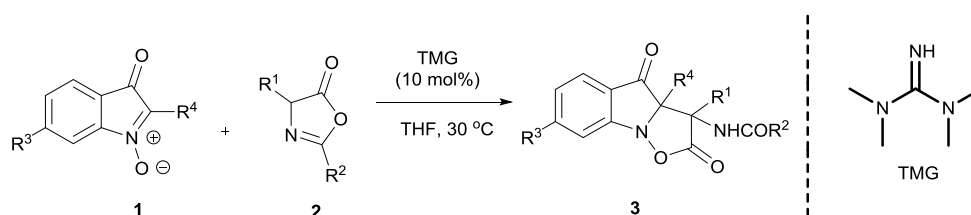

In a dry tube was charged with the TMG (10 mol%), **1** (0.10 mmol), and **2** (0.10 mmol) in THF (1.0 mL) and was stirred at 30 °C for 24 h. The solvent was removed under reduced pressure, and then the mixture purified by column chromatography (petroleum ether/ethyl acetate = 5/1, v/v) to afford the product **3**.

### 3. Optimization of the reaction conditions

**Table S1.** Screening of chiral guanidines<sup>a</sup>

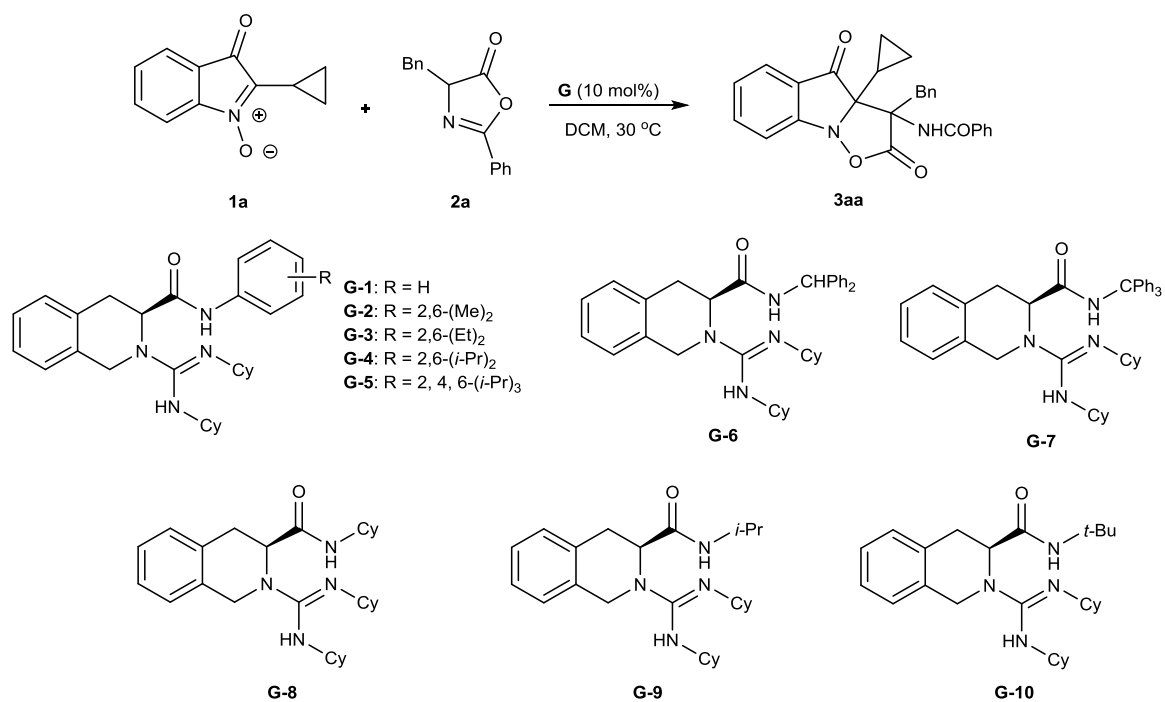

| entry | cat.        | yield (%) <sup>b</sup> | ee (%) <sup>c</sup> |
|-------|-------------|------------------------|---------------------|
| 1     | <b>G-1</b>  | 65                     | 59                  |
| 2     | <b>G-2</b>  | 56                     | 76                  |
| 3     | <b>G-3</b>  | 44                     | 62                  |
| 4     | <b>G-4</b>  | 36                     | 63                  |
| 5     | <b>G-5</b>  | 26                     | 41                  |
| 6     | <b>G-6</b>  | 53                     | 70                  |
| 7     | <b>G-7</b>  | 57                     | 31                  |
| 8     | <b>G-8</b>  | 33                     | 44                  |
| 9     | <b>G-9</b>  | 43                     | 51                  |
| 10    | <b>G-10</b> | 54                     | 47                  |

<sup>a</sup> The reactions were carried out with **1a** (0.10 mmol), **2a** (0.10 mmol) and **G** (10 mol%) in DCM (1.0 mL) at 30 °C under N<sub>2</sub> for 18 h. Dr values (>19:1) were determined by <sup>1</sup>H NMR. <sup>b</sup> Isolated yield. <sup>c</sup> Determined by UPCC analysis on a chiral stationary phase.

**Table S2.** Screening of the solvents<sup>a</sup>

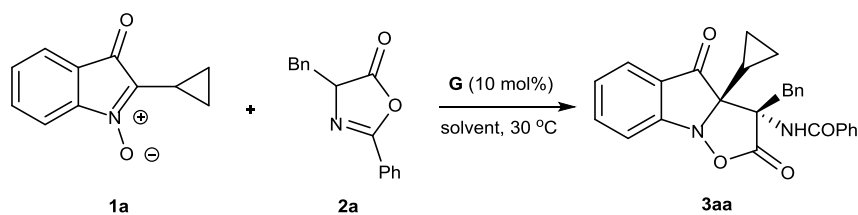

| entry | G; solvent                     | yield (%) <sup>b</sup> | ee (%) <sup>c</sup> |
|-------|--------------------------------|------------------------|---------------------|
| 1     | <b>G-1</b> ; Toluene           | 48                     | 58                  |
| 2     | <b>G-1</b> ; THF               | 99                     | 65                  |
| 3     | <b>G-1</b> ; DCM               | 65                     | 59                  |
| 4     | <b>G-1</b> ; Et <sub>2</sub> O | 69                     | 66                  |
| 5     | <b>G-2</b> ; THF               | 63                     | 83                  |
| 6     | <b>G-6</b> ; THF               | 52                     | 83                  |

<sup>a</sup> The reactions were carried out with **1a** (0.10 mmol), **2a** (0.10 mmol) and **G-1** (10 mol%) in solvent (1.0 mL) at 30 °C under N<sub>2</sub> for 18 h. Dr values (>19:1) were determined by <sup>1</sup>H NMR. <sup>b</sup> Isolated yield. <sup>c</sup> Determined by UPCC analysis on a chiral stationary phase.

**Table S3.** Screening of the temperature<sup>a</sup>

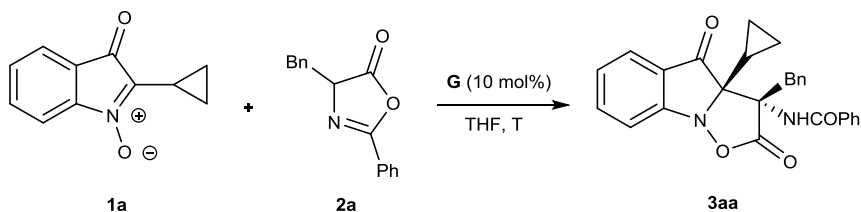

| entry | T (°C) | <b>G-2</b>             |                     | <b>G-6</b>             |                     |
|-------|--------|------------------------|---------------------|------------------------|---------------------|
|       |        | yield (%) <sup>b</sup> | ee (%) <sup>c</sup> | yield (%) <sup>b</sup> | ee (%) <sup>c</sup> |
| 1     | 0      | 46                     | 91                  | 80                     | 87                  |
| 2     | -10    | 57                     | 94                  | 85                     | 92                  |
| 3     | -20    | 64                     | 93.5                | 85                     | 93                  |
| 4     | -30    | 61                     | 93                  | 85                     | 93                  |
| 5     | -40    | 46                     | 93                  | 88                     | 95                  |
| 6     | -50    | 43                     | 93                  | 69                     | 94                  |

<sup>a</sup> The reactions were carried out with **1a** (0.10 mmol), **2a** (0.10 mmol) and **G** (10 mol%) in THF (1.0 mL) under N<sub>2</sub> for 18 h. Dr values (>19:1) were determined by <sup>1</sup>H NMR. <sup>b</sup> Isolated yield. <sup>c</sup> Determined by UPCC analysis on a chiral stationary phase.

**Table S4.** Screening of the ratio of two substrates<sup>a</sup>

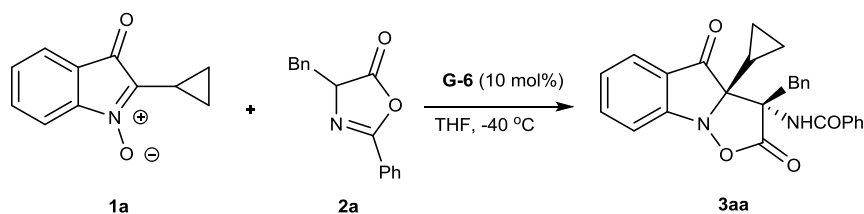

| entry           | T (°C) | cat. (mol%)           | <b>1a</b> : <b>2a</b> | yield (%) <sup>b</sup> | ee (%) <sup>c</sup> |
|-----------------|--------|-----------------------|-----------------------|------------------------|---------------------|
| 1 <sup>d</sup>  | -20    | <b>G-2</b> (10 mol%)  | 1 : 1                 | 85                     | 93.5                |
| 2 <sup>d</sup>  | -20    | <b>G-2</b> (10 mol%)  | 1 : 1.2               | 92                     | 92                  |
| 3 <sup>d</sup>  | -20    | <b>G-6</b> (10 mol%)  | 1 : 1.2               | 86                     | 93                  |
| 4 <sup>d</sup>  | -20    | <b>G-6</b> (10 mol%)  | 1.2 : 1               | 78                     | 93                  |
| 5               | -40    | <b>G-6</b> (10 mol%)  | 1 : 1.2               | 88                     | 95                  |
| 6               | -40    | <b>G-6</b> (10 mol%)  | 1 : 1.5               | 78                     | 93                  |
| 7               | -40    | <b>G-6</b> (5 mol%)   | 1 : 1.2               | 83                     | 93                  |
| 8               | -40    | <b>G-6</b> (2.5 mol%) | 1 : 1.2               | 13                     | 51                  |
| 9               | -40    | <b>G-6</b> (10 mol%)  | 1.2 : 1               | 94                     | 95                  |
| 10              | -40    | <b>G-6</b> (5 mol%)   | 1.2 : 1               | 87                     | 93                  |
| 11 <sup>d</sup> | -40    | <b>G-6</b> (10 mol%)  | 1 : 1.2               | 92                     | 94                  |

<sup>a</sup> The reactions were carried out with **1a**, **2a** and **G** (10 mol%) in THF (1.0 mL) under N<sub>2</sub> for 18 h. Dr values (>19:1) were determined by <sup>1</sup>H NMR. <sup>b</sup> Isolated yield. <sup>c</sup> Determined by UPCC analysis on a chiral stationary phase. <sup>d</sup> For 24 h.



For example

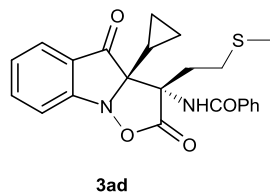

The reactions were carried out with **1a** (0.10 mmol), **2d** (0.12 mmol) in THF (1.0 mL) under N<sub>2</sub>.

- A. Using 10 mol% of **G-2** at -20 °C for 16 h.  
99% yield, 85% ee
- B. Using 10 mol% of **G-6** at -20 °C for 12 h.  
99% yield, 89% ee
- C. Using 10 mol% of **G-6** at -40 °C for 9 h.  
99% yield, 91% ee

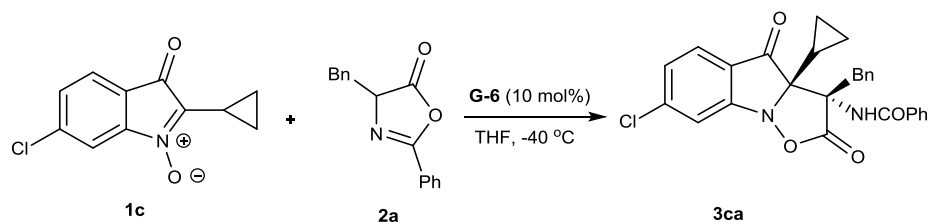

| entry          | <b>1c</b> : <b>2a</b> | yield (%) <sup>b</sup> | ee (%) <sup>c</sup> |
|----------------|-----------------------|------------------------|---------------------|
| 1              | 1 : 1                 | 46                     | 95                  |
| 2              | 1 : 1.2               | 44                     | 95                  |
| 3              | 1 : 1.5               | 39                     | 94                  |
| 4              | 1.2 : 1               | 46                     | 95                  |
| 5              | 1.5 : 1               | 59                     | 95                  |
| 6 <sup>d</sup> | 1 : 1                 | 38                     | 90                  |
| 7 <sup>e</sup> | 1 : 1                 | 38                     | 89                  |
| 8 <sup>f</sup> | 1.5 : 1               | 73                     | 96                  |

<sup>a</sup> The reactions were carried out with **1c**, **2a** and **G-6** (10 mol%) in THF (1.0 mL) at -40 °C under N<sub>2</sub> for 24 h. Dr values (>19:1) were determined by <sup>1</sup>H NMR. <sup>b</sup> Isolated yield. <sup>c</sup> Determined by UPCC analysis on a chiral stationary phase. <sup>d</sup> Using 5 mol% of **G-6**. <sup>e</sup> Using 2.5 mol% of **G-6**. <sup>f</sup> Using 10 mol% of **G-6** for 36 h.

#### 4. Substrate scope

##### Scheme 1. Substrate scope of isotogens **1**<sup>a</sup>

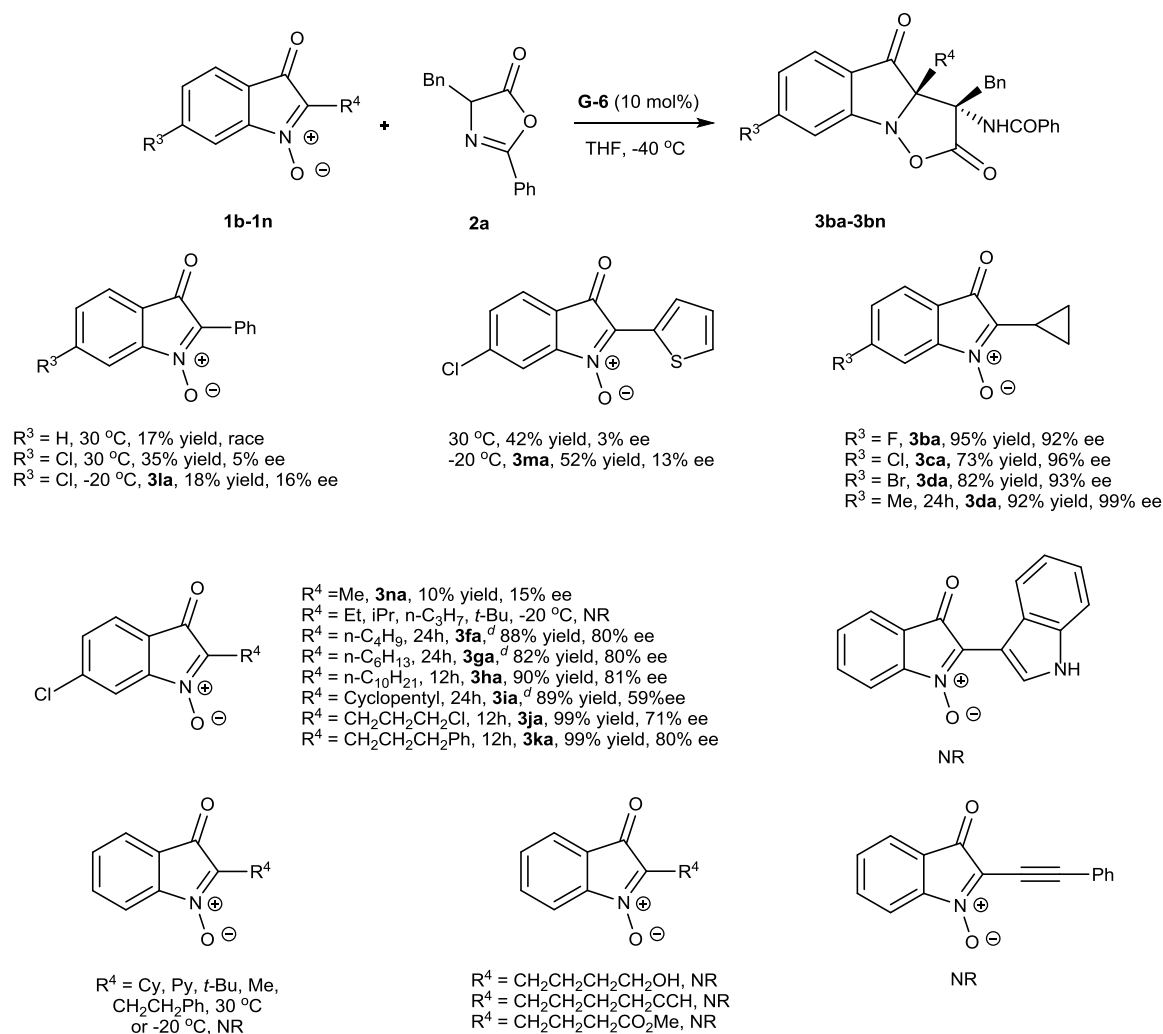

<sup>a</sup> The reactions were carried out with **1** (0.15 mmol), **2a** (0.10 mmol) and **G-6** (10 mol%) in THF (1.0 mL) at -40 °C under N<sub>2</sub> for 36 h. Dr values (>19:1) were determined by <sup>1</sup>H NMR. <sup>b</sup> Isolated yield. <sup>c</sup> Determined by UPCC analysis on a chiral stationary phase. <sup>d</sup> At -20 °C. NR = no reaction.

**Table S5.** Substrate scope of azlactones **2<sup>a</sup>**

| entry | t (h) | R <sup>1</sup> , R <sup>2</sup>          | yield (%) <sup>b</sup> | ee (%) <sup>c</sup> |
|-------|-------|------------------------------------------|------------------------|---------------------|
| 1     | 24    | Bn, C <sub>6</sub> H <sub>5</sub>        | <b>3aa</b> , 92        | 94                  |
| 2     | 36    | phenethyl, C <sub>6</sub> H <sub>5</sub> | <b>3ab</b> , 91        | 94                  |
| 3     | 36    | isobutyl, C <sub>6</sub> H <sub>5</sub>  | <b>3ac</b> , 95        | 93                  |

|                 |    |                                                         |                 |    |
|-----------------|----|---------------------------------------------------------|-----------------|----|
| 4               | 9  | 2-(methylthio)ethyl, C <sub>6</sub> H <sub>5</sub>      | <b>3ad</b> , 99 | 91 |
| 5               | 24 | (1H-indol-3-yl)methyl, C <sub>6</sub> H <sub>5</sub>    | <b>3ae</b> , 84 | 91 |
| 6               | 9  | cyclohexylmethyl, C <sub>6</sub> H <sub>5</sub>         | <b>3af</b> , 81 | 93 |
| 7               | 9  | 4-chlorobenzyl, C <sub>6</sub> H <sub>5</sub>           | <b>3ag</b> , 86 | 95 |
| 8               | 9  | 4-bromobenzyl, C <sub>6</sub> H <sub>5</sub>            | <b>3ah</b> , 94 | 94 |
| 9               | 9  | 3-methylbenzyl, C <sub>6</sub> H <sub>5</sub>           | <b>3ai</b> , 83 | 90 |
| 10              | 9  | Bn, 4-FC <sub>6</sub> H <sub>4</sub>                    | <b>3aj</b> , 94 | 92 |
| 11              | 9  | Bn, 4-ClC <sub>6</sub> H <sub>4</sub>                   | <b>3ak</b> , 96 | 92 |
| 12              | 9  | Bn, 4-BrC <sub>6</sub> H <sub>4</sub>                   | <b>3al</b> , 82 | 91 |
| 13 <sup>d</sup> | 36 | Bn, 4-MeOC <sub>6</sub> H <sub>4</sub>                  | <b>3am</b> , 65 | 91 |
| 14              | 9  | Bn, 3,5-(Me) <sub>2</sub> C <sub>6</sub> H <sub>3</sub> | <b>3an</b> , 83 | 99 |
| 15 <sup>e</sup> | 36 | Bn, 2-naphthyl                                          | <b>3ao</b> , 78 | 94 |

<sup>a</sup> Unless otherwise noted, the reactions were carried out **G-6** (10 mol%), **1a** (0.10 mmol) and **2** (0.12 mmol) in THF (1.0 mL) at -40 °C. Dr values (>19:1) were determined by <sup>1</sup>H NMR. <sup>b</sup> Isolated yield.

<sup>c</sup> Determined by UPCC analysis on a chiral stationary phase. <sup>d</sup> At -20 °C. <sup>e</sup> At -10 °C.

Substrate of failure : The reactions were carried out with **1a** (0.10 mmol) and **2** (0.10 mmol) and **G-6** (10 mol%) in THF (1.0 mL) at -40 °C under N<sub>2</sub> for 24 h.

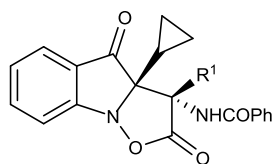

R<sup>1</sup> = Me, 44% yield, 31% ee  
R<sup>1</sup> = Ph, 29% yield, 7% ee  
R<sup>1</sup> = Et, 9% yield, 44% ee  
R<sup>1</sup> = iPr, Cy, tBu, NR

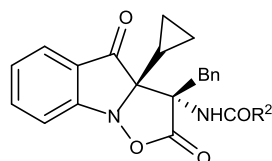

At -20 °C

R<sup>2</sup> = 1-adamantyl, 19% yield, 44% ee  
R<sup>2</sup> = 2-furyl, 14% yield, 85% ee  
R<sup>2</sup> = 2-thienyl, 20% yield, 83% ee  
R<sup>2</sup> = cyclohexyl, 11% yield, 65% ee  
R<sup>2</sup> = 4-MeC<sub>6</sub>H<sub>4</sub>, 4-NCC<sub>6</sub>H<sub>4</sub>, NR

## 5. Typical procedure for the asymmetric reaction

### 5.1. Representative experimental procedure for the asymmetric reaction of isotogen **1a** with azlactone **2a**

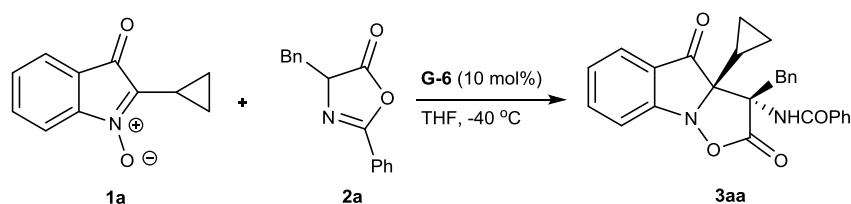

A dry tube was charged with **G-6** (5.6 mg, 0.01 mmol, 10 mol%) and **1a** (18.7 mg, 0.10 mmol). Under N<sub>2</sub> atmosphere, THF (1.0 mL) was added. The mixture was stirred at 30 °C for 30 min and then cooled to -40 °C. Then azlactone **2a** (30.1 mg, 0.12 mmol) was added under stirring and the mixture continued stirring at -40 °C for 24 h. The solvent was removed under reduced pressure, and then the mixture purified by column chromatography (petroleum ether/ethyl acetate = 5/1, v/v) to afford the product **3aa**. The product **3aa** was obtained in 92% yield (40.3 mg). The enantiomeric excess (ee) was determined by UPCC with Daicel Chiralcel **OJ** (94% ee).

## 5.2. Typical experimental procedure for the scale-up reaction

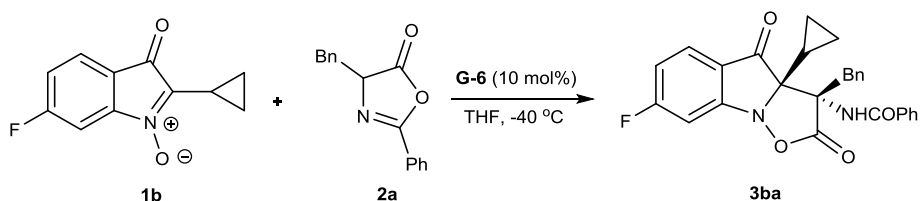

A dry round-bottom flask was charged with **G-6** (56.0 mg, 0.1 mmol, 10 mol%) and **1b** (307.5 mg, 1.5 mmol). Under N<sub>2</sub> atmosphere, THF (15.0 mL) was added. The mixture was stirred at 30 °C for 30 min and then cooled to -40 °C. Then azlactone **2a** (251.0 mg, 1.0 mmol) was added under stirring and the mixture continued stirring at -40 °C for 48 h. The solvent was removed under reduced pressure, and then the mixture was purified by flash column chromatography on silica gel (petroleum ether/ethyl acetate = 5/1, v/v) to afford the product **3ba**. The product **3ba** was obtained in 87% yield (396.7 mg). The enantiomeric excess (ee) was determined by UPCC with Daicel Chiralcel **OJ** (92% ee).

## 6. The analytical and spectral characterization data of the products

### *N*-[(3*S*,3*aS*)-3-Benzyl-3*a*-cyclopropyl-2,4-dioxo-2,3,3*a*,4-tetrahydroisoxazolo[2,3-*a*]indol-3-yl]benzamide

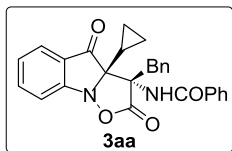

The compound **3aa** was purified by silica gel chromatography (petroleum ether/ethyl acetate = 5/1) to afford a yellow oil in 92% yield. **UPCC** (Daicel Chiralcel **OJ**, scCO<sub>2</sub>/MeOH = 80/20, flow rate 1.5 mL/min, λ = 254 nm), t (major) = 3.79 min, t (minor) = 2.73 min, ee = 94%. dr >19:1 (by <sup>1</sup>H NMR).

[α]<sub>D</sub><sup>20</sup> = +279.7 (c: 0.86, in CH<sub>2</sub>Cl<sub>2</sub>). **<sup>1</sup>H NMR** (400 MHz, CDCl<sub>3</sub>) δ 7.74 – 7.67 (m, 1H), 7.66 – 7.50 (m, 4H), 7.48 – 7.36 (m, 4H), 7.26 (5H), 6.48 (s, 1H), 4.02 (d, J = 15.2 Hz, 1H), 3.58 (d, J = 15.2 Hz, 1H), 1.68 (tt, J = 8.1, 5.3 Hz, 1H), 0.95 – 0.78 (m, 2H), 0.53 – 0.43 (m, 1H), 0.27 (dq, J = 10.1, 5.2 Hz, 1H). **<sup>13</sup>C{<sup>1</sup>H} NMR** (101 MHz, CDCl<sub>3</sub>) δ 197.0, 172.6, 165.5, 159.8, 136.4, 132.5, 131.6, 131.3, 130.0, 128.4, 127.8, 127.4, 126.2, 126.0, 125.5, 122.8, 119.4, 78.7, 61.8, 39.2, 13.0, 2.8, 0.0. **IR** 3366, 1792, 1723, 1660, 1605, 1580, 1517, 1474, 1294, 1173, 1137, 769, 730, 701 cm<sup>-1</sup>. **HRMS** (FTMS+c ESI) calcd for C<sub>27</sub>H<sub>22</sub>N<sub>2</sub>O<sub>4</sub> [(M+H)<sup>+</sup>] = 439.1652, Found 439.1658.

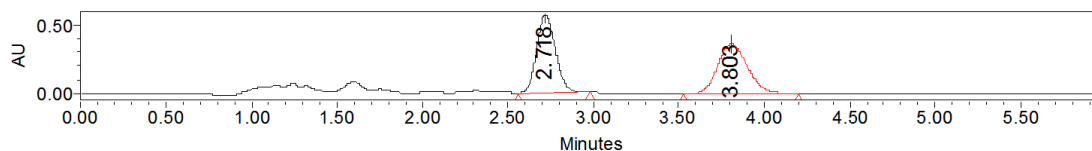

|   | Retention Time | Area    | % Area |
|---|----------------|---------|--------|
| 1 | 2.718          | 4409157 | 50.11  |
| 2 | 3.803          | 4389891 | 49.89  |

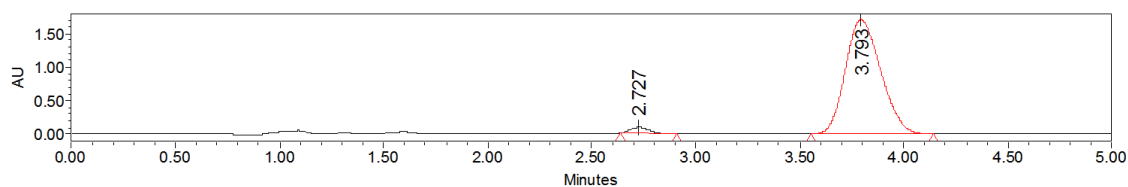

|   | Retention Time | Area     | % Area |
|---|----------------|----------|--------|
| 1 | 2.727          | 592177   | 2.85   |
| 2 | 3.793          | 20216256 | 97.15  |

***N*-[(3*S*,3*aS*)-3*a*-Cyclopropyl-2,4-dioxo-3-phenethyl-2,3,3*a*,4-tetrahydroisoxazolo[2,3-*a*]indol-3-yl]benzamide**

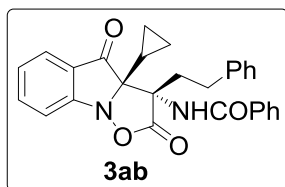

The compound **3ab** was purified by silica gel chromatography (petroleum ether/ethyl acetate = 5/1) to afford a yellow oil in 91% yield. **UPCC** (Daicel Chiralcel **OJ**, scCO<sub>2</sub>/MeOH = 90/10, flow rate 1.5 mL/min, λ = 254 nm), t (major) = 4.24 min, t (minor) = 5.23 min, ee = 94%. dr >19:1 (by <sup>1</sup>H NMR).

[α]<sub>D</sub><sup>23</sup> = +299.4 (c: 0.37, in CH<sub>2</sub>Cl<sub>2</sub>). **<sup>1</sup>H NMR** (400 MHz, CDCl<sub>3</sub>) δ 7.73 - 7.65 (m, 1H), 7.58 - 7.51 (m, 2H), 7.46 - 7.30 (m, 5H), 7.27 -

7.20 (m, 5H), 7.15 - 7.10 (m, 2H), 6.51 (s, 1H), 3.32 - 3.09 (m, 2H), 2.88 - 2.64 (m, 2H), 1.49 (tt, J = 8.1, 5.3 Hz, 1H), 0.88 - 0.70 (m, 2H), 0.50 - 0.35 (m, 1H), 0.22 (dq, J = 10.2, 5.2 Hz, 1H). **<sup>13</sup>C{<sup>1</sup>H} NMR** (101 MHz, CDCl<sub>3</sub>) δ 198.2, 173.2, 166.5, 160.8, 140.9, 137.2, 132.2, 132.1, 129.3, 128.8, 128.5, 127.0, 126.9, 126.8, 126.2, 123.6, 120.2, 79.7, 63.4, 35.3, 29.4, 12.7, 3.6, 0.5. **IR** 3361, 1781, 1720, 1656, 1604, 1580, 1519, 1485, 1455, 1293, 1139, 1088, 1030, 732, 700 cm<sup>-1</sup>. **HRMS** (FTMS+c ESI) calcd for C<sub>28</sub>H<sub>24</sub>N<sub>2</sub>O<sub>4</sub> [(M+H)<sup>+</sup>] = 453.1809, Found 453.1810.

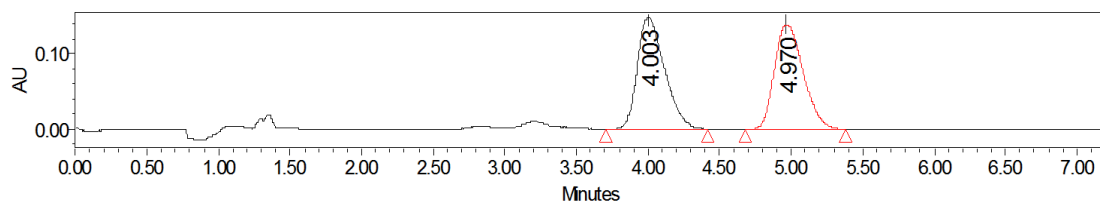

|   | Retention Time | Area    | % Area |
|---|----------------|---------|--------|
| 1 | 4.003          | 1968541 | 50.17  |
| 2 | 4.970          | 1954943 | 49.83  |

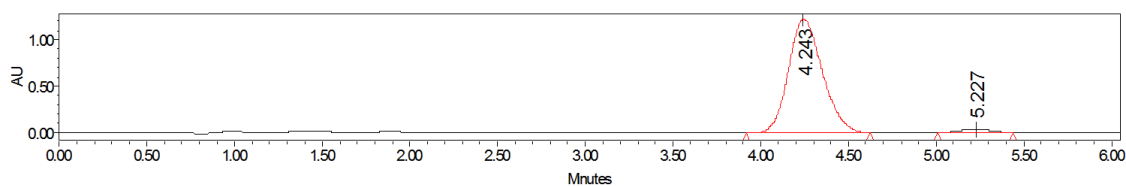

|   | Retention Time | Area     | % Area |
|---|----------------|----------|--------|
| 1 | 4.243          | 16616628 | 97.14  |
| 2 | 5.227          | 488879   | 2.86   |

***N*-[(3*S*,3*aS*)-3*a*-Cyclopropyl-3-isobutyl-2,4-dioxo-2,3,3*a*,4-tetrahydroisoxazolo[2,3-*a*]indol-3-yl]benzamide**

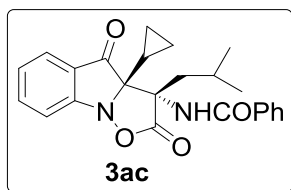

The compound **3ac** was purified by Aluminum oxide (neutral) (petroleum ether/ethyl acetate = 5/1) to afford a yellow oil in 95% yield. **UPCC** (Daicel Chiralcel **ODH**, scCO<sub>2</sub>/MeOH = 80/20, flow rate 1.0 mL/min, λ = 254 nm), t (major) = 8.91 min, t (minor) = 6.70 min, ee = 93%. dr >19:1 (by <sup>1</sup>H NMR).

[α]<sub>D</sub><sup>20</sup> = +334.4 (c: 0.49, in CH<sub>2</sub>Cl<sub>2</sub>). <sup>1</sup>H NMR (400 MHz, MeOD) δ 7.84 – 7.78 (m, 1H), 7.68 – 7.58 (m, 4H), 7.57 – 7.51 (m, 1H), 7.48 – 7.41 (m, 3H), 2.46 (dd, J = 14.9, 4.2 Hz, 1H), 2.34 (dd, J = 14.9, 7.3 Hz, 1H), 2.24 (qd, J = 6.7, 4.2 Hz, 1H), 1.48 – 1.38 (m, 1H), 1.20 (d, J = 6.6 Hz, 3H), 1.05 (d, J = 6.6 Hz, 3H), 0.81 – 0.71 (m, 2H), 0.42 – 0.32 (m, 1H), -0.02 – -0.10 (m, 1H). <sup>13</sup>C{<sup>1</sup>H} NMR (101 MHz, MeOD) δ 199.7, 173.5, 170.3, 161.3, 137.9, 134.3, 133.1, 129.5, 129.2, 128.6, 124.5, 122.4, 79.4, 65.4, 42.9, 25.6, 25.0, 24.2, 14.0, 4.9, 0.5. **IR** 3372, 1786, 1722, 1657, 1605, 1524, 1486, 1294, 1175, 1157, 1140, 1135, 765, 750, 709 cm<sup>-1</sup>. **HRMS** (FTMS+c ESI) calcd for C<sub>24</sub>H<sub>24</sub>N<sub>2</sub>O<sub>4</sub> [(M+H<sup>+</sup>)] = 405.1809. Found 405.1806.

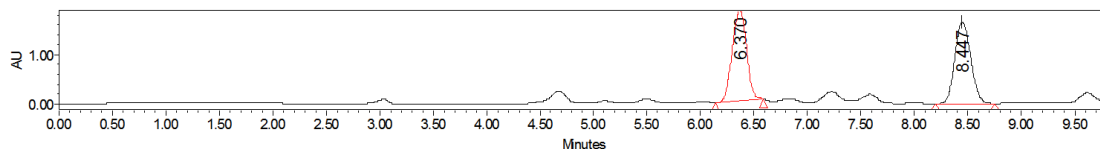

|   | Retention Time | Area     | % Area |
|---|----------------|----------|--------|
| 1 | 6.370          | 17271337 | 49.52  |
| 2 | 8.447          | 17605467 | 50.48  |

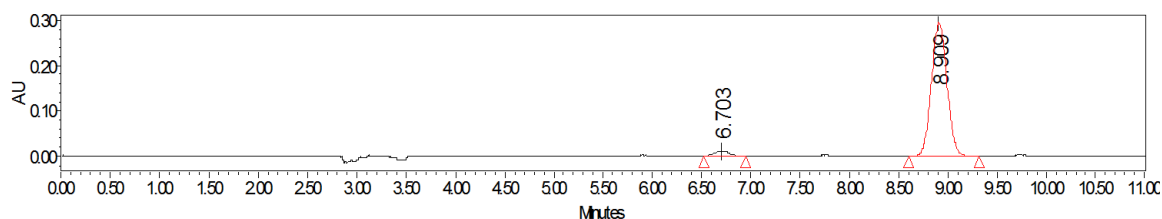

|   | Retention Time | Area    | % Area |
|---|----------------|---------|--------|
| 1 | 6.703          | 118897  | 3.54   |
| 2 | 8.909          | 3239699 | 96.46  |

***N*-[(3*S*,3*aS*)-3*a*-Cyclopropyl-3-(2-(methylthio)ethyl)-2,4-dioxo-2,3,3*a*,4-tetrahydroisoxazolo[2,3-*a*]indol-3-yl]benzamide**

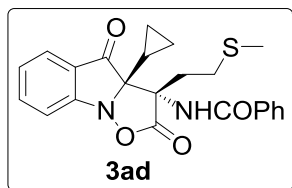

The compound **3ad** was purified by silica gel chromatography (petroleum ether/ethyl acetate = 5/1) to afford a pale yellow oil in 99% yield. **UPCC** (Daicel Chiralcel **ODH**, scCO<sub>2</sub>/MeOH = 80/20, 1.0 mL/min, λ = 254 nm), t (major) = 11.46 min, t (minor) = 8.55 min, ee = 91%. dr >19:1 (by <sup>1</sup>H NMR). [α]<sub>D</sub><sup>19</sup> = +350.0 (c: 0.65, in CH<sub>2</sub>Cl<sub>2</sub>). <sup>1</sup>H NMR (400 MHz, CDCl<sub>3</sub>) δ 7.96 (s, 1H), 7.73 – 7.68 (m, 1H), 7.64 – 7.52 (m, 4H), 7.48 – 7.42 (m, 1H), 7.38 – 7.32 (m, 2H), 7.30 – 7.26 (m, 1H), 3.19 – 3.09 (m, 1H), 3.08 – 2.98 (m, 1H), 2.78 – 2.68 (m, 1H), 2.68 – 2.58 (m, 1H), 2.22 (s, 3H), 1.45 – 1.36 (m, 1H), 0.84 – 0.70 (m, 2H), 0.46 – 0.36 (m, 1H), 0.24 – 0.13 (m, 1H). <sup>13</sup>C{<sup>1</sup>H} NMR (101 MHz, CDCl<sub>3</sub>) δ 197.9, 173.4, 166.8, 160.5, 137.1, 132.2, 132.2, 128.6, 127.3, 127.1, 126.4, 123.6, 120.3, 79.0, 63.5, 32.3, 27.8, 16.0, 12.9, 3.6, 0.5. **IR** 3344, 1784, 1721, 1659, 1605, 1580, 1523, 1486, 1325, 1293, 1172, 1164, 1141, 768, 711 cm<sup>-1</sup>. **HRMS** (FTMS+c ESI) calcd for C<sub>23</sub>H<sub>22</sub>N<sub>2</sub>O<sub>4</sub>S [(M+H)<sup>+</sup>] = 423.1373. Found 423.1379.

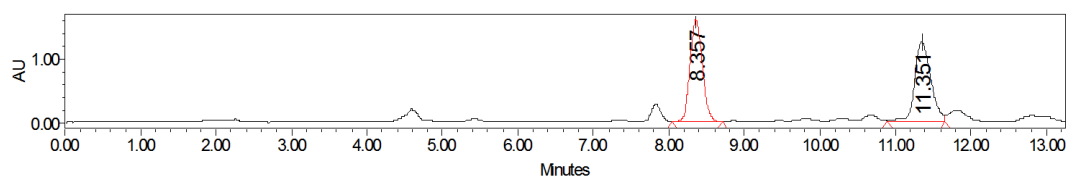

|   | Retention Time | Area     | % Area |
|---|----------------|----------|--------|
| 1 | 8.357          | 18580170 | 49.61  |
| 2 | 11.351         | 18873540 | 50.39  |

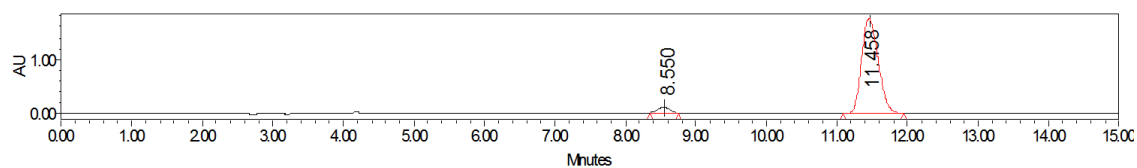

|   | Retention Time | Area     | % Area |
|---|----------------|----------|--------|
| 1 | 8.550          | 1291048  | 4.32   |
| 2 | 11.458         | 28611184 | 95.68  |



***N*-[(3*S*,3*aS*)-3-((1*H*-indol-3-yl)methyl)-3*a*-cyclopropyl-2,4-dioxo-2,3,3*a*,4-tetrahydroisoxazolo[2,3-*a*]indol-3-yl]benzamide**

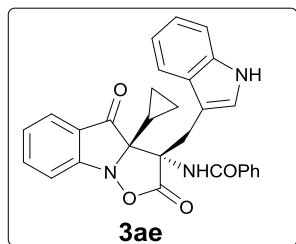

The compound **3ae** was purified by silica gel chromatography (petroleum ether/ethyl acetate = 2/1) to afford a pale yellow solid in 84% yield. **UPCC** (Daicel Chiralcel. **OX**, scCO<sub>2</sub>/MeOH = 80/20, 1.5 mL/min, λ = 254nm), *t* (major) = 8.63 min, *t* (minor) = 12.45 min, ee = 91%. dr >19:1 (by <sup>1</sup>H NMR). mp decomposed at 80 °C. [α]<sub>D</sub><sup>23</sup> = +343.3 (*c*: 0.24, in CH<sub>2</sub>Cl<sub>2</sub>). <sup>1</sup>H NMR (400 MHz, (CD<sub>3</sub>)<sub>2</sub>CO) δ 10.37 (s, 1H), 8.05 – 7.79 (m, 2H), 7.78 – 7.72 (m, 2H), 7.65 – 7.54 (m, 2H), 7.52 – 7.33 (m, 5H), 7.33 – 7.26 (m, 2H), 7.21 – 7.10 (m, 2H), 4.17 (dd, *J* = 15.7, 0.9 Hz, 1H), 3.86 (dd, *J* = 15.7, 0.8 Hz, 1H), 1.89 – 1.70 (m, 1H), 0.96 – 0.73 (m, 2H), 0.43 (tdd, *J* = 8.8, 6.1, 4.4 Hz, 1H), 0.14 (dtd, *J* = 9.7, 5.8, 4.5 Hz, 1H). <sup>13</sup>C{<sup>1</sup>H} NMR (101 MHz, (CD<sub>3</sub>)<sub>2</sub>CO) δ 198.2, 173.6, 167.2, 161.3, 137.5, 137.2, 133.7, 132.7, 129.7, 129.1, 128.2, 128.0, 127.9, 126.1, 124.0, 122.5, 121.3, 120.2, 118.9, 112.6, 107.6, 79.2, 64.4, 31.0, 14.2, 4.2, 0.6. **IR** 3401, 1787, 1721, 1651, 1604, 1514, 1480, 1459, 1295, 1253, 1175, 1141, 1102, 740, 708 cm<sup>-1</sup>. **HRMS** (FTMS+c ESI) calcd for C<sub>29</sub>H<sub>23</sub>N<sub>3</sub>O<sub>4</sub> [(*M*+*H*<sup>+</sup>)] = 478.1761. Found 478.1767.

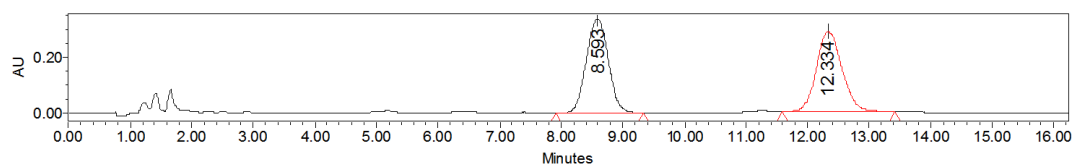

|   | Retention Time | Area    | % Area |
|---|----------------|---------|--------|
| 1 | 8.593          | 8323556 | 50.69  |
| 2 | 12.334         | 8096144 | 49.31  |

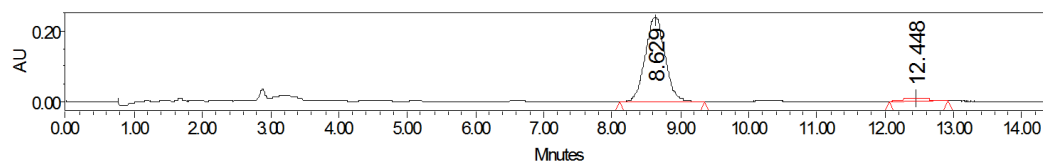

|   | Retention Time | Area    | % Area |
|---|----------------|---------|--------|
| 1 | 8.629          | 4831590 | 95.64  |
| 2 | 12.448         | 220198  | 4.36   |

***N*-[(3*S*,3*aS*)-3-(Cyclohexylmethyl)-3*a*-cyclopropyl-2,4-dioxo-2,3,3*a*,4-tetrahydroisoxazolo[2,3-*a*]indol-3-yl]benzamide**

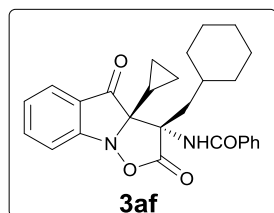

The compound **3af** was purified by silica gel chromatography (petroleum ether/ethyl acetate = 5/1) to afford a yellow oil in 81% yield. **UPCC** (Daicel Chiralcel **ODH**, scCO<sub>2</sub>/MeOH = 80/20, 1.0 mL/min, λ = 254nm), t (major) = 13.77 min, t (minor) = 7.87 min, ee = 93%. dr >19:1 (by <sup>1</sup>H NMR). [α]<sup>16</sup><sub>D</sub> = +289.6 (c: 0.64, in CH<sub>2</sub>Cl<sub>2</sub>). <sup>1</sup>H NMR (400 MHz, CDCl<sub>3</sub>) δ 7.73 - 7.66 (m, 1H), 7.59 - 7.52 (m, 2H), 7.51 - 7.43 (m, 3H), 7.42 - 7.32 (m, 2H), 7.30 - 7.21 (m, 2H), 6.46 (s, 1H), 2.35 - 2.20 (m, 2H), 2.17 - 2.05 (m, 1H), 1.94 (dt, J = 12.5, 2.8 Hz, 1H), 1.87 - 1.77 (m, 1H), 1.77 - 1.61 (m, 3H), 1.46 - 1.31 (m, 3H), 1.25 - 1.10 (m, 3H), 0.87 - 0.67 (m, 2H), 0.48 - 0.35 (m, 1H), 0.15 (ddt, J = 9.7, 5.8, 4.8 Hz, 1H). <sup>13</sup>C{<sup>1</sup>H} NMR (101 MHz, CDCl<sub>3</sub>) δ 198.5, 172.9, 166.6, 160.7, 137.1, 132.6, 132.2, 128.8, 127.1, 127.0, 126.5, 123.6, 120.4, 79.4, 63.4, 41.8, 36.1, 32.4, 26.4, 26.2, 26.0, 13.0, 3.9, 0.5. **IR** 3364, 1787, 1721, 1655, 1605, 1580, 1522, 1484, 1448, 1293, 1265, 1178, 1159, 1135, 848, 767, 732, 707 cm<sup>-1</sup>. **HRMS** (FTMS+c ESI) calcd for C<sub>27</sub>H<sub>28</sub>N<sub>2</sub>O<sub>4</sub> [(M+H)<sup>+</sup>] = 445.2122. Found 445.2114.

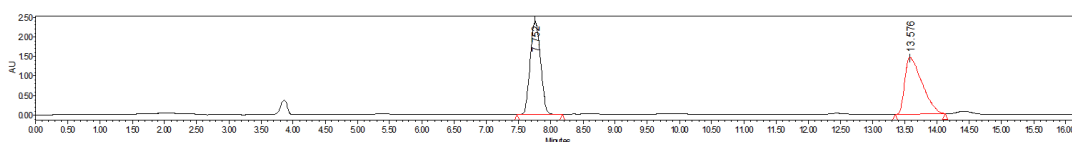

|   | Retention Time | Area     | % Area |
|---|----------------|----------|--------|
| 1 | 7.752          | 26586325 | 49.71  |
| 2 | 13.576         | 26897750 | 50.29  |

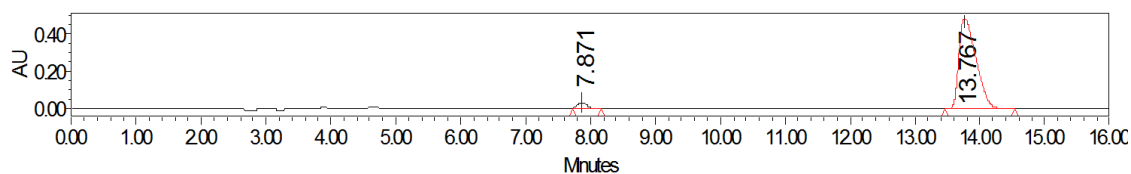

|   | Retention Time | Area    | % Area |
|---|----------------|---------|--------|
| 1 | 7.871          | 305724  | 3.36   |
| 2 | 13.767         | 8803146 | 96.64  |

***N*-[(3*S*,3*aS*)-3-(4-Chlorobenzyl)-3*a*-cyclopropyl-2,4-dioxo-2,3,3*a*,4-tetrahydroisoxazolo[2,3-*a*]indol-3-yl]benzamide**

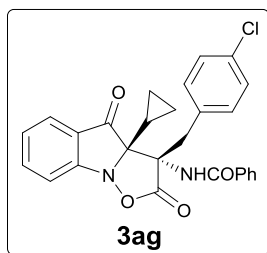

The compound **3ag** was purified by Aluminum oxide (neutral) (petroleum ether/ethyl acetate = 5/1) to afford a yellow solid in 86% yield. **UPCC** (Daicel Chiralcel **OJ**, scCO<sub>2</sub>/MeOH = 80/20, flow rate 1.5 mL/min, λ = 254nm), t (major) = 5.68 min, t (minor) = 4.31 min, ee = 95%. dr >19:1 (by <sup>1</sup>H NMR). mp decomposed at 58 °C. [α]<sub>D</sub><sup>19</sup> = +284.6 (c: 0.60, in CH<sub>2</sub>Cl<sub>2</sub>). <sup>1</sup>H NMR (400 MHz, CDCl<sub>3</sub>) δ 7.76 – 7.698 (m, 1H), 7.61 – 7.54 (m, 2H), 7.49 – 7.36 (m, 5H), 7.33 – 7.26 (m, 5H), 6.40 (s, 1H), 3.96 (d, J = 15.3 Hz, 1H), 3.56 (d, J = 15.3 Hz, 1H), 1.63 (tt, J = 8.0, 5.3 Hz, 1H), 0.92 – 0.79 (m, 2H), 0.51 – 0.42 (m, 1H), 0.29 – 0.20 (m, 1H). <sup>13</sup>C{<sup>1</sup>H} NMR (101 MHz, CDCl<sub>3</sub>) δ 198.0, 173.0, 166.7, 160.6, 137.3, 134.3, 132.3, 132.3, 132.2, 131.9, 129.2, 128.7, 127.3, 126.9, 126.4, 123.7, 120.5, 79.3, 62.8, 39.3, 13.7, 3.8, 0.8. **IR** 3369, 1769, 1728, 1656, 1605, 1580, 1523, 1485, 1298, 1176, 1141, 1097, 1016, 766, 710 cm<sup>-1</sup>. **HRMS** (FTMS+c ESI) calcd for C<sub>27</sub>H<sub>21</sub>N<sub>2</sub>O<sub>4</sub>Cl [(M+H<sup>+</sup>)] = 473.1263, 475.1233. Found 473.1265, 475.1240.

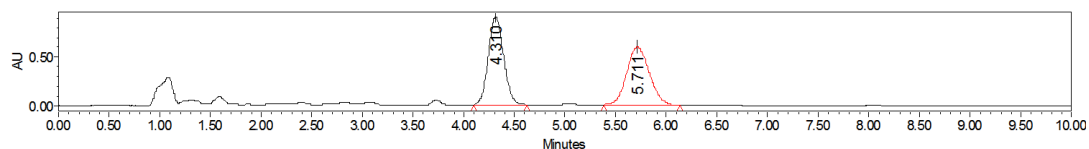

|   | Retention Time | Area    | % Area |
|---|----------------|---------|--------|
| 1 | 4.310          | 9406124 | 50.70  |
| 2 | 5.711          | 9146091 | 49.30  |

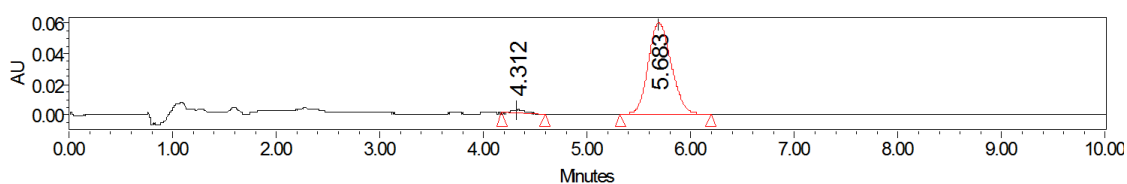

|   | Retention Time | Area   | % Area |
|---|----------------|--------|--------|
| 1 | 4.312          | 21958  | 2.37   |
| 2 | 5.683          | 905819 | 97.63  |

***N*-[(3*S*,3*aS*)-3-(4-Bromobenzyl)-3*a*-cyclopropyl-2,4-dioxo-2,3,3*a*,4-tetrahydroisoxazolo[2,3-*a*]indol-3-yl]benzamide**

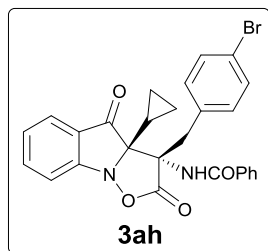

The compound **3ah** was purified by Aluminum oxide (neutral) (petroleum ether/ethyl acetate = 5/1) to afford a yellow solid in 94% yield. **UPCC**(Daicel Chiralcel. **OJ**, scCO<sub>2</sub>/MeOH = 80/20, flow rate 1.5 mL/min, λ = 254 nm), t (major) = 7.95 min, t (minor) = 5.55 min, ee = 94%. dr >19:1 (by <sup>1</sup>H NMR). mp decomposed at 56 °C. [α]<sub>D</sub><sup>20</sup> = +263.8 (c: 0.71, in CH<sub>2</sub>Cl<sub>2</sub>). <sup>1</sup>H NMR (400 MHz, CDCl<sub>3</sub>) δ 7.74 – 7.68 (m, 1H), 7.61 – 7.49 (m, 4H), 7.48 – 7.34 (m, 5H), 7.31 – 7.26 (m, 1H), 7.15 – 7.08 (m, 2H), 6.51 (s, 1H), 4.00 (d, J = 15.1 Hz, 1H), 3.57 (d, J = 15.1 Hz, 1H), 1.65 (tt, J = 8.0, 5.3 Hz, 1H), 0.94 – 0.79 (m, 2H), 0.52 – 0.42 (m, 1H), 0.30 – 0.19 (m, 1H). <sup>13</sup>C{<sup>1</sup>H} NMR (101 MHz, CDCl<sub>3</sub>) δ 198.0, 173.2, 165.6, 160.6, 137.3, 133.2, 131.9, 131.3, 130.9, 129.2, 128.5, 128.4, 127.3, 127.0, 126.4, 123.6, 120.4, 79.4, 62.7, 40.0, 13.8, 3.8, 0.9. **IR** 3381, 2360, 2340, 1769, 1730, 1655, 1605, 1523, 1485, 1298, 1176, 1143, 1074, 1014, 765, 749, 710 cm<sup>-1</sup>. **HRMS** (FTMS+c ESI) calcd for C<sub>27</sub>H<sub>21</sub>N<sub>2</sub>O<sub>4</sub>Br [(M+H)<sup>+</sup>] = 517.0758, 519.0737. Found 517.0761, 519.0736.

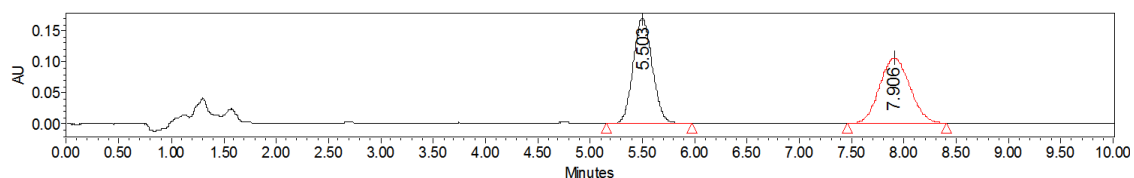

|   | Retention Time | Area    | % Area |
|---|----------------|---------|--------|
| 1 | 5.503          | 2140949 | 50.17  |
| 2 | 7.906          | 2126843 | 49.83  |

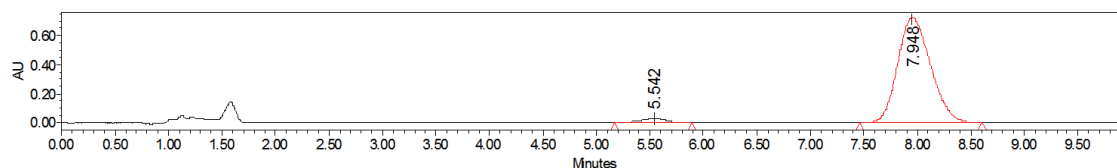

|   | Retention Time | Area     | % Area |
|---|----------------|----------|--------|
| 1 | 5.549          | 457790   | 2.89   |
| 2 | 7.953          | 15375050 | 97.11  |

***N*-[(3*S*,3*aS*)-3*a*-Cyclopropyl-3-(3-methylbenzyl)-2,4-dioxo-2,3,3*a*,4-tetrahydroisoxazolo[2,3-*a*]indol-3-yl]benzamide**

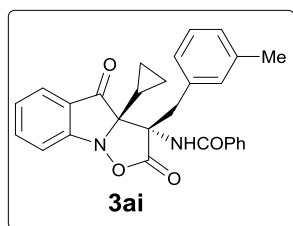

The compound **3ai** was purified by silica gel chromatography (petroleum ether/ethyl acetate = 5/1) to afford a yellow oil in 83% yield. **UPCC** (Daicel Chiralcel. **OJ**, scCO<sub>2</sub>/MeOH = 90/10, flow rate 1.5 mL/min, λ = 254 nm), t (major) = 8.28 min, t (minor) = 5.86 min, ee = 90%. dr >19:1 (by <sup>1</sup>H NMR). [α]<sub>D</sub><sup>19</sup> = +214.0 (c: 0.31, in CH<sub>2</sub>Cl<sub>2</sub>). <sup>1</sup>H NMR (400 MHz, CDCl<sub>3</sub>) δ 7.74 – 7.68 (m, 1H), 7.60 – 7.48 (m, 2H), 7.47 – 7.31 (m, 4H), 7.28 – 7.22 (m, 5H), 7.21 – 7.15 (m, 1H), 6.53 (s, 1H), 3.99 (d, J = 15.1 Hz, 1H), 3.53 (d, J = 15.2 Hz, 1H), 2.40 (s, 3H), 1.68 (tt, J = 8.1, 5.3 Hz, 1H), 0.98 – 0.75 (m, 2H), 0.54 – 0.42 (m, 1H), 0.34 – 0.19 (m, 1H). <sup>13</sup>C{<sup>1</sup>H} NMR (101 MHz, CDCl<sub>3</sub>) δ 197.8, 173.5, 166.2, 160.7, 139.0, 137.2, 133.2, 132.5, 132.1, 131.7, 129.1, 129.0, 128.6, 127.8, 127.0, 126.9, 126.3, 123.6, 120.2, 79.6, 62.5, 40.0, 21.6, 13.9, 3.7, 0.8. **IR** 3409, 1792, 1722, 1662, 1605, 1581, 1517, 1484, 1293, 1268, 1173, 1137, 1102, 849, 767, 701 cm<sup>-1</sup>. **HRMS** (FTMS+c ESI) calcd for C<sub>28</sub>H<sub>24</sub>N<sub>2</sub>O<sub>4</sub> [(M+H<sup>+</sup>)] = 453.1809. Found 453.1804.

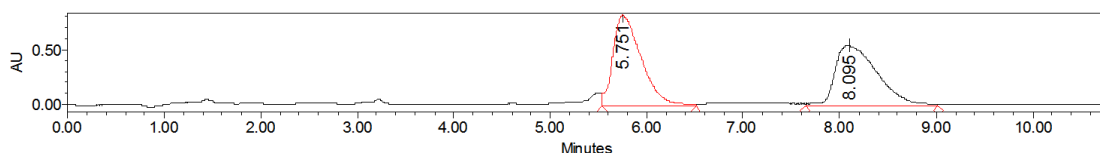

|   | Retention Time | Area     | % Area |
|---|----------------|----------|--------|
| 1 | 5.751          | 16743233 | 50.62  |
| 2 | 8.095          | 16335395 | 49.38  |

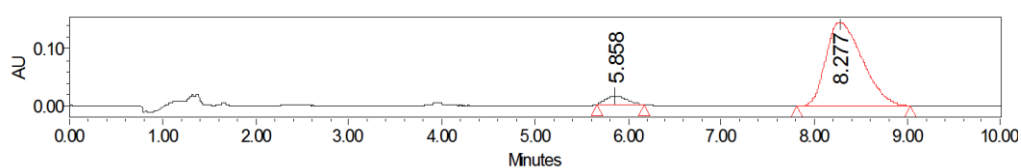

|   | Retention Time | Area    | % Area |
|---|----------------|---------|--------|
| 1 | 5.858          | 213398  | 5.08   |
| 2 | 8.277          | 3983455 | 94.92  |

***N*-[(3*S*,3*aS*)-3-Benzyl-3*a*-cyclopropyl-2,4-dioxo-2,3,3*a*,4-tetrahydroisoxazolo[2,3-*a*]indol-3-yl]-4-fluorobenzamide**

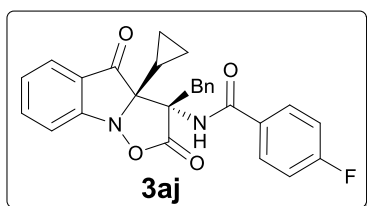

The compound **3aj** was purified by silica gel chromatography (petroleum ether/ethyl acetate = 5/1) to afford a yellow oil in 94% yield. UPCC (Daicel Chiralcel. **OX**, scCO<sub>2</sub>/MeOH = 80/20, flow rate 1.5 mL/min, λ = 254 nm), t (major) = 2.69 min, t (minor) = 3.11 min, ee = 92%. dr >19:1 (by <sup>1</sup>H NMR). [α]<sub>D</sub><sup>19</sup> = +385.8 (c: 0.41, in CH<sub>2</sub>Cl<sub>2</sub>). <sup>1</sup>H NMR (400 MHz, CDCl<sub>3</sub>) δ 7.75 – 7.69 (m, 1H), 7.62 – 7.48 (m, 4H), 7.48 – 7.42 (m, 2H), 7.41 – 7.35 (m, 1H), 7.31 – 7.23 (m, 4H), 6.94 (t, J = 8.5 Hz, 2H), 6.41 (s, 1H), 4.01 (d, J = 15.2 Hz, 1H), 3.58 (d, J = 15.2 Hz, 1H), 1.73 – 1.61 (m, 1H), 0.96 – 0.78 (m, 2H), 0.53 – 0.43 (m, 1H), 0.26 (dq, J = 10.2, 5.2 Hz, 1H). <sup>13</sup>C{<sup>1</sup>H} NMR (101 MHz, CDCl<sub>3</sub>) δ 197.9, 173.4, 165.3, 165.1 (d, J = 253.5 Hz, 1C), 160.6, 137.2, 133.3, 130.9, 129.3 (d, J = 9.1 Hz, 1C), 129.2, 128.7 (d, J = 3.0 Hz, 1C), 128.3, 127.2, 126.4, 123.6, 120.4, 115.8 (d, J = 22.2 Hz, 1C), 79.4, 62.7, 40.0, 13.9, 3.8, 0.9. <sup>19</sup>F{<sup>1</sup>H} NMR (376 MHz, CDCl<sub>3</sub>) δ –106.8. IR 3354, 1790, 1728, 1657, 1604, 1530, 1496, 1293, 1236, 1159, 1136, 852, 766, 724, 701 cm<sup>-1</sup>. HRMS (FTMS+c ESI) calcd for C<sub>27</sub>H<sub>21</sub>N<sub>2</sub>O<sub>4</sub>F [(M+H<sup>+</sup>)] = 457.1558, Found 457.1554.

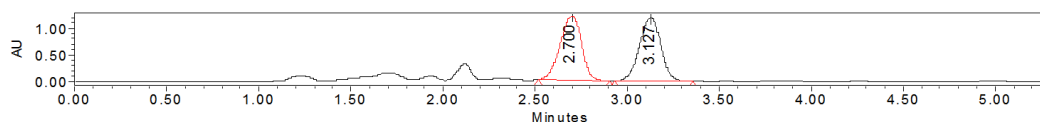

|   | Retention Time | Area    | % Area |
|---|----------------|---------|--------|
| 1 | 2.700          | 9707893 | 50.33  |
| 2 | 3.127          | 9579144 | 49.67  |

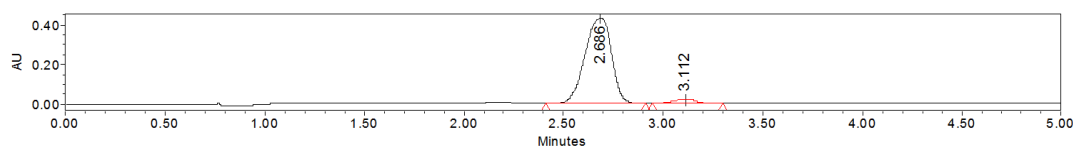

|   | Retention Time | Area    | % Area |
|---|----------------|---------|--------|
| 1 | 2.686          | 4002403 | 95.92  |
| 2 | 3.112          | 170406  | 4.08   |

***N*-[(3*S*,3*aS*)-3-Benzyl-3*a*-cyclopropyl-2,4-dioxo-2,3,3*a*,4-tetrahydroisoxazolo[2,3-*a*]indol-3-yl]-4-chlorobenzamide**

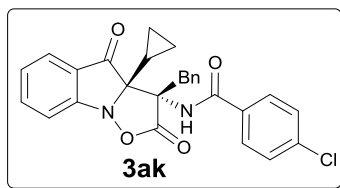

The compound **3ak** was purified by silica gel chromatography (petroleum ether/ethyl acetate = 10/1) to afford a yellow oil in 96% yield. **UPCC** (Daicel Chiralcel. **OJ**, scCO<sub>2</sub>/MeOH = 80/20, 1.5 mL/min, λ = 254 nm), t (major) = 5.54 min, t (minor) = 3.51 min, ee = 92%. dr >19:1 (by <sup>1</sup>H NMR). [α]<sub>D</sub><sup>23</sup> = +262.2 (c: 0.26, in CH<sub>2</sub>Cl<sub>2</sub>). <sup>1</sup>H

**NMR** (400 MHz, CDCl<sub>3</sub>) δ 7.75 – 7.69 (m, 1H), 7.62 – 7.50 (m, 4H), 7.48 – 7.33 (m, 5H), 7.30 – 7.22 (m, 2H), 7.14 – 7.08 (m, 2H), 6.41 (s, 1H), 4.01 (d, J = 15.2 Hz, 1H), 3.57 (d, J = 15.2 Hz, 1H), 1.73 – 1.63 (m, 2H), 0.93 – 0.78 (m, 2H), 0.53 – 0.43 (m, 1H), 0.31 – 0.20 (m, 1H). <sup>13</sup>C{<sup>1</sup>H} **NMR** (101 MHz, CDCl<sub>3</sub>) δ 197.1, 172.4, 164.6, 159.8, 137.7, 136.4, 132.4, 130.0, 130.0, 128.4, 128.2, 128.1, 128.1, 127.5, 126.4, 125.5, 122.8, 119.5, 78.5, 61.8, 39.1, 13.0, 2.9, 0.0. **IR** 3351, 1788, 1727, 1656, 1604, 1522, 1482, 1438, 1294, 1173, 1137, 1090, 1014, 847, 759, 723, 700 cm<sup>-1</sup>. **HRMS** (FTMS+c ESI) calcd for C<sub>27</sub>H<sub>21</sub>N<sub>2</sub>O<sub>4</sub>Cl [(M+H<sup>+</sup>)] = 473.1263, 475.1233, Found 473.1263, 475.1240.

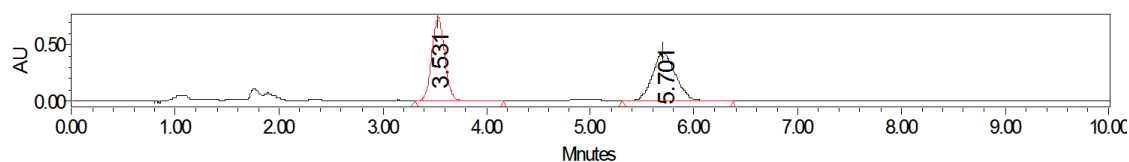

|   | Retention Time | Area    | % Area |
|---|----------------|---------|--------|
| 1 | 3.531          | 6480906 | 49.46  |
| 2 | 5.701          | 6623395 | 50.54  |

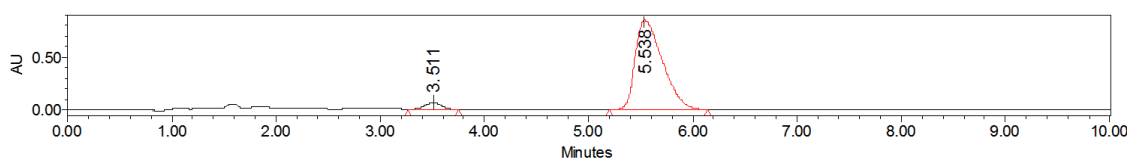

|   | Retention Time | Area     | % Area |
|---|----------------|----------|--------|
| 1 | 3.511          | 673103   | 4.20   |
| 2 | 5.538          | 15360420 | 95.80  |

***N*-[(3*S*,3*aS*)-3-Benzyl-3*a*-cyclopropyl-2,4-dioxo-2,3,3*a*,4-tetrahydroisoxazolo[2,3-*a*]indol-3-yl]-4-bromobenzamide**

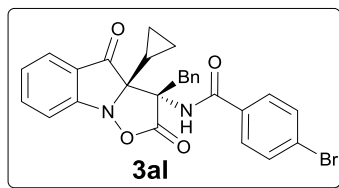

The compound **3al** was purified by Aluminum oxide (neutral) (petroleum ether/ethyl acetate = 10/1) to afford a yellow oil in 82% yield. **UPCC** (Daicel Chiralcel **OJ**, scCO<sub>2</sub>/MeOH = 80/20, 1.5 mL/min, λ = 254 nm), t (major) = 7.52 min, t (minor) = 4.44 min, ee = 91%. dr >19:1 (by <sup>1</sup>H NMR). [α]<sub>D</sub><sup>20</sup> = +241.6 (c: 0.43, in CH<sub>2</sub>Cl<sub>2</sub>). **<sup>1</sup>H**

**NMR** (400 MHz, CDCl<sub>3</sub>) δ 7.76 – 7.69 (m, 1H), 7.62 – 7.52 (m, 4H), 7.45 – 7.37 (m, 3H), 7.35 – 7.27 (m, 5H), 6.45 (s, 1H), 3.95 (d, J = 15.2 Hz, 1H), 3.54 (d, J = 15.2 Hz, 1H), 1.67 – 1.58 (m, 1H), 0.94 – 0.79 (m, 2H), 0.51 – 0.43 (m, 1H), 0.28 – 0.21 (m, 1H). **<sup>13</sup>C{<sup>1</sup>H} NMR** (101 MHz, CDCl<sub>3</sub>) δ 197.1, 172.2, 165.7, 159.8, 136.5, 131.7, 131.5, 131.5, 131.5, 131.3, 127.9, 126.5, 126.1, 125.5, 122.9, 121.6, 119.6, 78.5, 61.8, 43.1, 12.8, 2.9, 0.00. **IR** 3363, 1796, 1728, 1662, 1605, 151, 1523, 1479, 1296, 1173, 1138, 1010, 767, 756, 722, 700 cm<sup>-1</sup>. **HRMS** (FTMS+c ESI) calcd for C<sub>27</sub>H<sub>21</sub>N<sub>2</sub>O<sub>4</sub>Br [(M+H)<sup>+</sup>] = 517.0758, 519.0737, Found 517.0761, 519.0736.

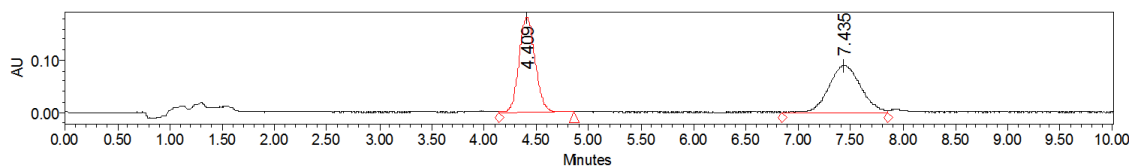

|   | Retention Time | Area    | % Area |
|---|----------------|---------|--------|
| 1 | 4.409          | 1938317 | 50.59  |
| 2 | 7.435          | 1893257 | 49.41  |

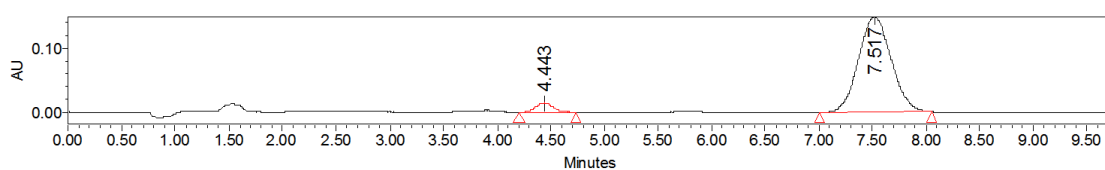

|   | Retention Time | Area    | % Area |
|---|----------------|---------|--------|
| 1 | 4.443          | 153767  | 4.69   |
| 2 | 7.517          | 3122205 | 95.31  |



***N*-[(3*S*,3*aS*)-3-Benzyl-3*a*-cyclopropyl-2,4-dioxo-2,3,3*a*,4-tetrahydroisoxazolo[2,3-*a*]indol-3-yl]-4-methoxybenzamide**

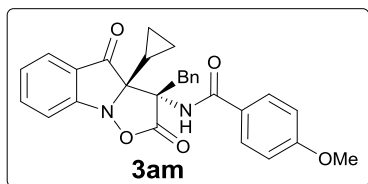

The compound **3am** was purified by silica gel chromatography (petroleum ether/ethyl acetate = 5/1) to afford a yellow oil in 65% yield. **UPCC** (Daicel Chiralcel. **OX**, scCO<sub>2</sub>/MeOH = 80/20, 1.5 mL/min, λ = 254 nm), t (major) = 4.23 min, t (minor) = 5.21 min, ee = 91%. dr >19:1 (by <sup>1</sup>H NMR). [α]<sub>D</sub><sup>19</sup> = +256.5 (*c*: 0.43, in CH<sub>2</sub>Cl<sub>2</sub>). **<sup>1</sup>H NMR** (400 MHz, CDCl<sub>3</sub>) δ 7.74 – 7.67 (m, 1H), 7.59 – 7.52 (m, 4H), 7.48 – 7.41 (m, 2H), 7.40 – 7.34 (m, 1H), 7.30 – 7.22 (m, 2H), 7.18 – 7.10 (m, 2H), 7.09 – 7.00 (m, 2H), 6.42 (s, 1H), 4.01 (d, *J* = 15.2 Hz, 1H), 3.57 (d, *J* = 15.2 Hz, 1H), 2.30 (s, 3H), 1.73 – 1.62 (m, 1H), 0.93 – 0.78 (m, 2H), 0.54 – 0.42 (m, 1H), 0.27 (dq, *J* = 10.3, 5.2 Hz, 1H). **<sup>13</sup>C{<sup>1</sup>H} NMR** (101 MHz, CDCl<sub>3</sub>) δ 197.8, 173.6, 166.2, 160.7, 142.7, 137.2, 133.4, 130.9, 129.6, 129.3, 129.2, 128.2, 127.0, 126.9, 126.3, 123.6, 120.21, 79.7, 62.6, 40.1, 21.6, 13.9, 3.7, 0.8. **IR** 3356, 1790, 1724, 1656, 1606, 1527, 1494, 1294, 1174, 1138, 752, 724, 701 cm<sup>-1</sup>. **HRMS** (FTMS+c ESI) calcd for C<sub>28</sub>H<sub>24</sub>N<sub>2</sub>O<sub>5</sub> [(*M*+*H*<sup>+</sup>)] = 469.1758. Found 469.1759.

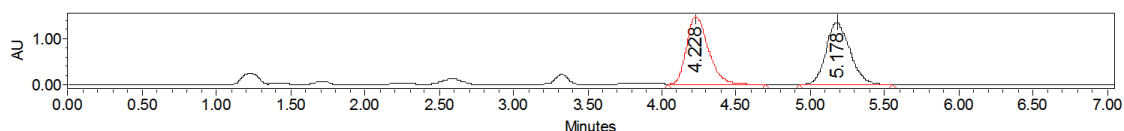

|   | Retention Time | Area  | % Area |
|---|----------------|-------|--------|
| 1 | 4.228          | 4.228 | 4.228  |
| 2 | 5.178          | 5.178 | 5.178  |

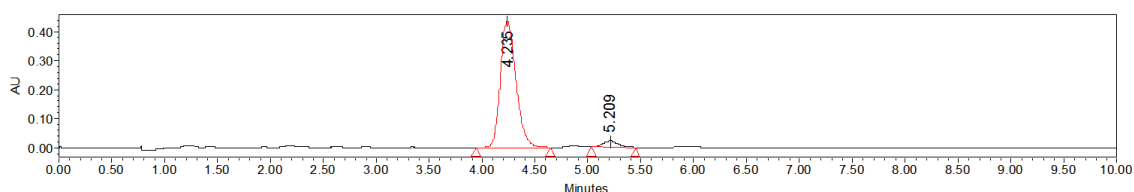

|   | Retention Time | Area    | % Area |
|---|----------------|---------|--------|
| 1 | 4.235          | 4484233 | 95.48  |
| 2 | 5.209          | 212440  | 4.52   |

***N*-[(3*S*,3*aS*)-3-Benzyl-3*a*-cyclopropyl-2,4-dioxo-2,3,3*a*,4-tetrahydroisoxazolo[2,3-*a*]indol-3-yl]-3,5-dimethylbenzamide**

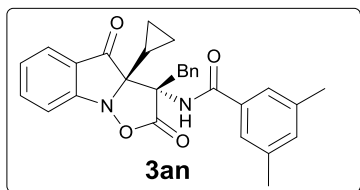

The compound **3an** was purified by silica gel chromatography (petroleum ether/ethyl acetate = 5/1) to afford a t yellow oil in 83% yield. UPCC (Daicel Chiralcel. **OJ**, scCO<sub>2</sub>/MeOH = 80/20, 1.5 mL/min, λ = 254 nm), t (major) = 2.75 min, (minor) = 2.14 min, ee = 99%. dr >19:1 (by <sup>1</sup>H NMR). [α]<sub>D</sub><sup>20</sup> = +288.6 (c: 0.53, in CH<sub>2</sub>Cl<sub>2</sub>).

<sup>1</sup>H NMR (400 MHz, CDCl<sub>3</sub>) δ 7.75 – 7.68 (ddd, J = 8.2, 7.2, 1.3 Hz, 1H), 7.63 – 7.50 (m, 4H), 7.49 – 7.42 (m, 2H), 7.41 – 7.36 (m, 1H), 7.31 – 7.25 (m, 2H), 7.01 (s, 1H), 6.83 (s, 2H), 6.43 (s, 1H), 4.01 (d, J = 15.1 Hz, 1H), 3.57 (d, J = 15.1 Hz, 1H), 2.20 (s, 6H), 1.72 – 1.61 (m, 1H), 0.95 – 0.77 (m, 2H), 0.52 – 0.43 (m, 1H), 0.30 – 0.22 (m, 1H). <sup>13</sup>C{<sup>1</sup>H} NMR (101 MHz, CDCl<sub>3</sub>) δ 166.7, 160.6, 138.3, 137.1, 133.7, 133.4, 132.4, 131.0, 129.1, 128.2, 127.1, 126.4, 124.7, 123.7, 120.3, 79.4, 62.5, 40.0, 21.2, 21.2, 13.9, 3.7, 0.9. IR 3413, 1790, 1726, 1661, 1509, 1472, 1323, 1240, 1172, 1136, 858, 767, 722, 701 cm<sup>-1</sup>. HRMS (FTMS+c ESI) calcd for C<sub>29</sub>H<sub>26</sub>N<sub>2</sub>O<sub>4</sub> [(M+H)<sup>+</sup>] = 467.1965, Found 467.1962.

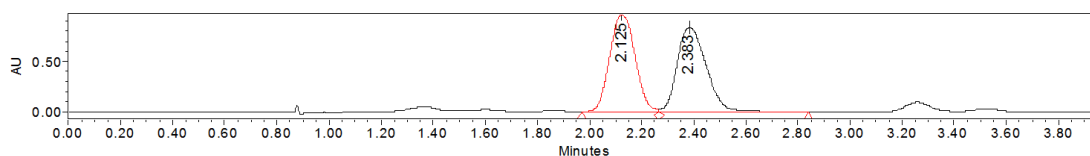

|   | Retention Time | Area    | % Area |
|---|----------------|---------|--------|
| 1 | 2.125          | 6490525 | 50.28  |
| 2 | 2.383          | 6418487 | 49.72  |

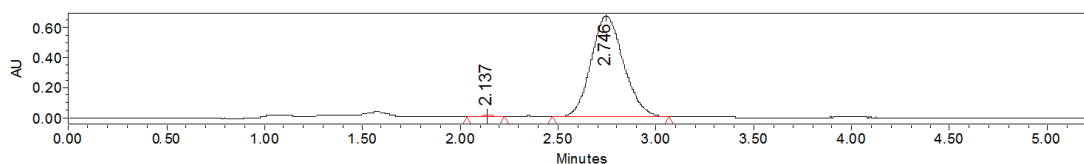

|   | Retention Time | Area    | % Area |
|---|----------------|---------|--------|
| 1 | 2.137          | 30114   | 0.39   |
| 2 | 2.746          | 7769718 | 99.61  |

***N*-[(3*S*,3*aS*)-3-Benzyl-3*a*-cyclopropyl-2,4-dioxo-2,3,3*a*,4-tetrahydroisoxazolo[2,3-*a*]indol-3-yl]-2-naphthamide**

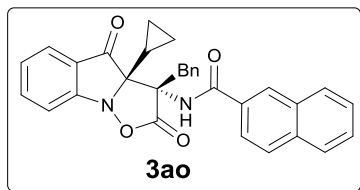

The compound **3ao** was purified by Aluminum oxide (neutral) (petroleum ether/ethyl acetate = 5/1) to afford a yellow oil in 78% yield. **UPCC** (Daicel Chiralcel. **OJ**, scCO<sub>2</sub>/MeOH = 80/20, 1.5 mL/min,  $\lambda$  = 254 nm), *t* (major) = 8.41 min, *t* (minor) = 6.19 min, ee = 94%. dr >19:1 (by <sup>1</sup>H NMR). [ $\alpha$ ]<sub>D</sub><sup>23</sup> = +209.1 (*c*: 0.23, in CH<sub>2</sub>Cl<sub>2</sub>).

**<sup>1</sup>H NMR** (400 MHz, CDCl<sub>3</sub>)  $\delta$  7.85 – 7.67 (m, 5H), 7.64 – 7.54 (m, 4H), 7.53 – 7.44 (m, 4H), 7.44 – 7.37 (m, 1H), 7.32 – 7.25 (m, 2H), 6.64 (s, 1H), 4.05 (d, *J* = 15.1 Hz, 1H), 3.62 (d, *J* = 15.1 Hz, 1H), 1.70 (tt, *J* = 8.0, 5.3 Hz, 1H), 0.97 – 0.80 (m, 2H), 0.54 – 0.44 (m, 1H), 0.33 – 0.24 (m, 1H). **<sup>13</sup>C{<sup>1</sup>H} NMR** (101 MHz, CDCl<sub>3</sub>)  $\delta$  197.0, 172.6, 165.5, 159.8, 136.3, 134.1, 132.5, 131.5, 130.1, 128.8, 128.3, 128.2, 127.7, 127.4, 127.2, 126.9, 126.9, 126.2, 126.0, 125.5, 122.8, 122.2, 119.4, 78.7, 61.8, 39.2, 13.0, 2.8, 0.0. **IR** 3413, 1789, 1725, 1660, 1605, 1519, 1498, 1436, 1296, 1173, 1138, 777, 723, 701, 660 cm<sup>-1</sup>. **HRMS** (FTMS+c ESI) calcd for C<sub>31</sub>H<sub>24</sub>N<sub>2</sub>O<sub>4</sub> [(*M*+*H*<sup>+</sup>)] = 489.1809. Found 489.1806.

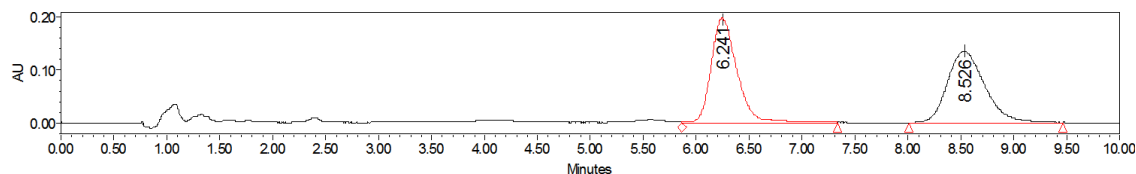

|   | Retention Time | Area    | % Area |
|---|----------------|---------|--------|
| 1 | 6.241          | 3298237 | 50.13  |
| 2 | 8.526          | 3280843 | 49.87  |

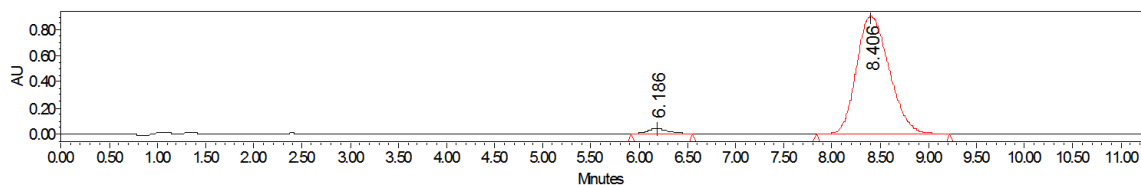

|   | Retention Time | Area     | % Area |
|---|----------------|----------|--------|
| 1 | 6.186          | 654474   | 2.98   |
| 2 | 8.406          | 21276720 | 97.02  |

***N*-[(3*S*,3*aS*)-3-Benzyl-3*a*-cyclopropyl-7-fluoro-2,4-dioxo-2,3,3*a*,4-tetrahydroisoxazolo[2,3-*a*]indol-3-yl]benzamide**

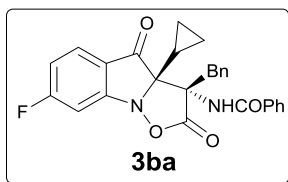

The compound **3ba** was purified by silica gel chromatography (petroleum ether/ethyl acetate = 5/1) to afford a pale yellow oil in 95% yield. **UPCC** (Daicel Chiralcel. **OJ**, scCO<sub>2</sub>/MeOH = 85/15, 1.5 mL/min, λ = 254 nm), *t* (major) = 3.47 min, *t* (minor) = 2.80 min, ee = 92%. dr >19:1 (by <sup>1</sup>H NMR). [α]<sub>D</sub><sup>19</sup> = +235.2 (*c*: 0.42, in CH<sub>2</sub>Cl<sub>2</sub>). <sup>1</sup>H NMR (400 MHz, CDCl<sub>3</sub>) δ 7.63 – 7.50 (m, 3H), 7.49 – 7.32 (m, 4H), 7.31 – 7.22 (m, 5H), 6.94 (td, *J* = 8.6, 2.2 Hz, 1H), 6.47 (s, 1H), 4.00 (d, *J* = 15.3 Hz, 1H), 3.58 (d, *J* = 15.3 Hz, 1H), 1.70 – 1.62 (m, 1H), 0.91 – 0.77 (m, 2H), 0.56 – 0.44 (m, 1H), 0.35 – 0.26 (m, 1H). <sup>13</sup>C{<sup>1</sup>H}NMR (101 MHz, CDCl<sub>3</sub>) δ 195.1, 172.6, 167.8 (d, *J* = 259.6 Hz, 1C), 165.4, 162.0 (d, *J* = 13.1 Hz, 1C), 132.3, 131.4, 131.3, 123.0, 128.5, 127.8, 127.5, 126.0, 124.9 (d, *J* = 11.1 Hz, 1C), 121.5, 114.6 (d, *J* = 24.2 Hz, 1C), 106.2 (d, *J* = 26.3 Hz, 1C), 79.7, 61.4, 39.2, 13.0, 2.7, 0.0. <sup>19</sup>F{<sup>1</sup>H} NMR (376 MHz, CDCl<sub>3</sub>) δ –97.4. IR 3350, 1796, 1727, 1659, 1599, 1517, 1483, 1314, 1270, 1229, 1139, 1063, 700, 638 cm<sup>-1</sup>. **HRMS** (FTMS+c ESI) calcd for C<sub>27</sub>H<sub>21</sub>N<sub>2</sub>O<sub>4</sub>F [(M+H)<sup>+</sup>] = 457.1558. Found 457.1559.

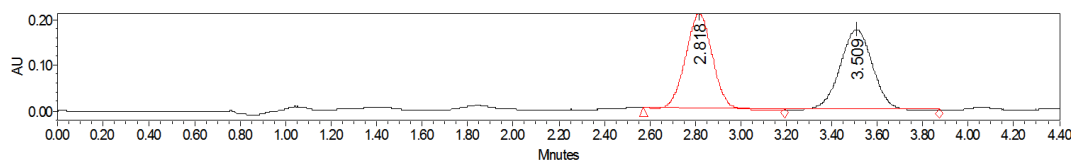

|   | Retention Time | Area    | % Area |
|---|----------------|---------|--------|
| 1 | 2.818          | 1694422 | 49.79  |
| 2 | 3.509          | 1708547 | 50.21  |

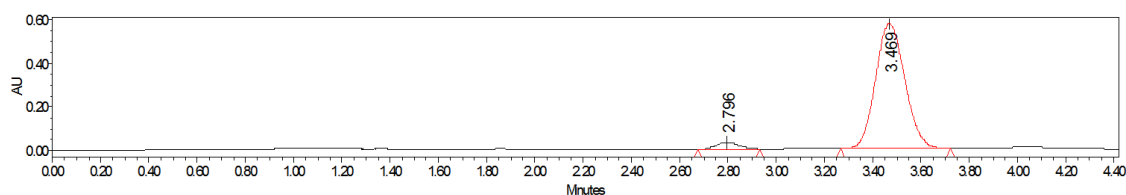

|   | Retention Time | Area    | % Area |
|---|----------------|---------|--------|
| 1 | 2.796          | 203350  | 4.05   |
| 2 | 3.469          | 4819902 | 95.95  |

***N*-[(3*S*,3*aS*)-3-Benzyl-7-chloro-3*a*-cyclopropyl-2,4-dioxo-2,3,3*a*,4-tetrahydroisoxazolo[2,3-*a*]indol-3-yl]benzamide**

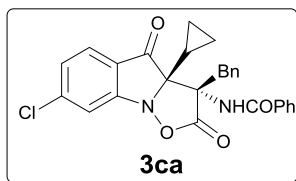

The compound **3ca** was purified by silica gel chromatography (petroleum ether/ethyl acetate = 5/1) to afford a pale yellow oil in 73% yield. **UPCC** (Daicel Chiralcel. **OJ**, scCO<sub>2</sub>/MeOH = 85/15, 1.5 mL/min, λ = 254nm), *t* (major) = 4.73 min, *t* (minor) = 3.71 min, ee = 96%. dr >19:1 (by <sup>1</sup>H NMR). [α]<sub>D</sub><sup>19</sup> = +392.4 (*c*: 0.36, in CH<sub>2</sub>Cl<sub>2</sub>). <sup>1</sup>H NMR (400 MHz, CDCl<sub>3</sub>) δ 7.62 – 7.51 (m, 3H), 7.50 – 7.35 (m, 5H), 7.30 – 7.25 (m, 4H), 7.23 (dd, *J* = 8.2, 1.7 Hz, 1H), 6.51 (s, 1H), 3.99 (d, *J* = 15.3 Hz, 1H), 3.58 (d, *J* = 15.3 Hz, 1H), 1.69 – 1.59 (m, 1H), 0.92 – 0.78 (m, 2H), 0.55 – 0.43 (m, 1H), 0.31 – 0.21 (m, 1H). <sup>13</sup>C{<sup>1</sup>H} NMR (101 MHz, CDCl<sub>3</sub>) δ 196.5, 173.2, 166.5, 161.3, 143.6, 133.2, 132.4, 132.1, 130.8, 129.3, 128.7, 128.4, 127.9, 126.9, 124.8, 124.5, 120.5, 79.9, 62.4, 40.0, 14.0, 3.7, 0.8. **IR** 3350, 1797, 1726, 1659, 1598, 151, 1481, 1314, 1137, 1063, 710, 698 cm<sup>-1</sup>. **HRMS** (FTMS+cESI) calcd for C<sub>27</sub>H<sub>21</sub>N<sub>2</sub>O<sub>4</sub>Cl [(*M*+*H*<sup>+</sup>)] = 473.1263, 475.1233. Found 473.1256, 475.1229.

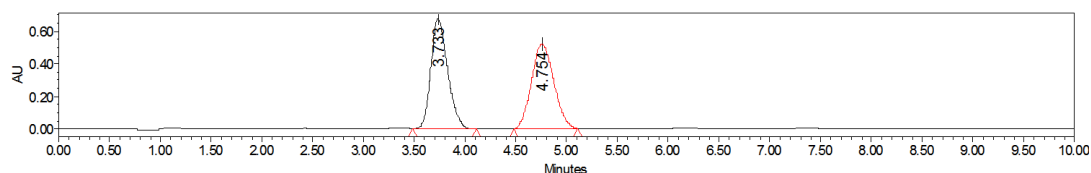

|   | Retention Time | Area    | % Area |
|---|----------------|---------|--------|
| 1 | 3.733          | 7635204 | 49.23  |
| 2 | 4.754          | 7874066 | 50.77  |

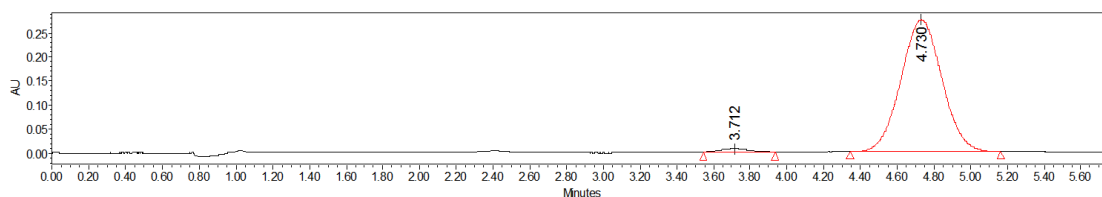

|   | Retention Time | Area    | % Area |
|---|----------------|---------|--------|
| 1 | 3.712          | 81532   | 1.88   |
| 2 | 4.730          | 4246430 | 98.12  |

***N*-[(3*S*,3*aS*)-3-Benzyl-7-bromo-3*a*-cyclopropyl-2,4-dioxo-2,3,3*a*,4-tetrahydroisoxazolo[2,3-*a*]indol-3-yl]benzamide**

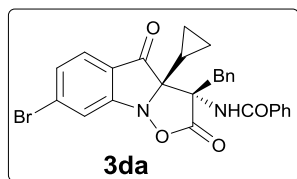

The compound **3da** was purified by silica gel chromatography (petroleum ether/ethyl acetate = 5/1) to afford a yellow oil in 82% yield. **UPCC** (Daicel Chiralcel. **OJ**, scCO<sub>2</sub>/MeOH = 85/15, 1.5 mL/min, λ = 254 nm), t (major) = 5.84 min, t (minor) = 4.57 min, ee = 93%. dr >19:1 (by <sup>1</sup>H NMR). [α]<sub>D</sub><sup>23</sup> = +345.5 (c: 0.22, in CH<sub>2</sub>Cl<sub>2</sub>). <sup>1</sup>H NMR (400 MHz, CDCl<sub>3</sub>) δ 7.76 (s, 1H), 7.56 – 7.51 (m, 2H), 7.49 – 7.34 (m, 6H), 7.31 – 7.26 (m, 4H), 6.52 (s, 1H), 3.98 (d, J = 15.2 Hz, 1H), 3.58 (d, J = 15.2 Hz, 1H), 1.67 – 1.58 (m, 1H), 0.91 – 0.78 (m, 2H), 0.53 – 0.43 (m, 1H), 0.30 – 0.20 (m, 1H). <sup>13</sup>C{<sup>1</sup>H} NMR (101 MHz, CDCl<sub>3</sub>) δ 196.7, 173.2, 166.5, 161.2, 133.2, 132.4, 132.2, 132.1, 130.8, 130.7, 129.3, 128.7, 128.4, 126.9, 125.3, 124.6, 123.5, 79.6, 62.4, 40.0, 13.9, 3.8, 0.8. **IR** 3340, 1795, 1724, 1656, 1596, 1514, 1481, 1137, 734, 701 cm<sup>-1</sup>. **HRMS** (FTMS+c ESI) calcd for **C<sub>27</sub>H<sub>21</sub>N<sub>2</sub>O<sub>4</sub>Br [(M+H)<sup>+</sup>]** = 517.0757, 519.0737. Found 517.0766, 519.0745.

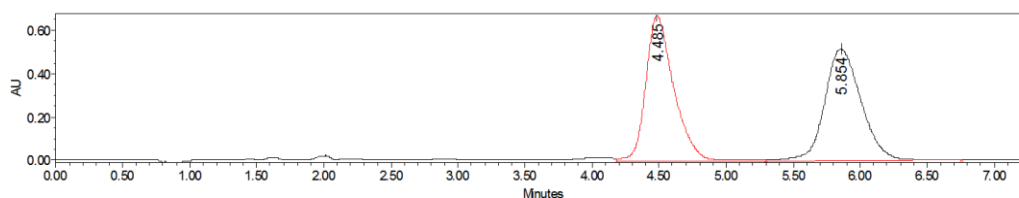

|   | Retention Time | Area    | % Area |
|---|----------------|---------|--------|
| 1 | 4.485          | 9695252 | 50.15  |
| 2 | 5.854          | 9638151 | 49.85  |

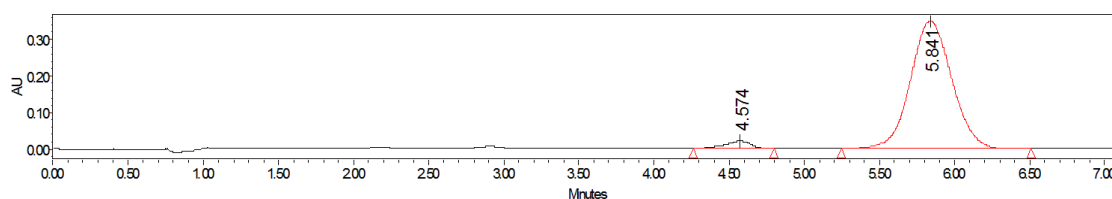

|   | Retention Time | Area    | % Area |
|---|----------------|---------|--------|
| 1 | 4.574          | 247336  | 3.57   |
| 2 | 5.841          | 6679215 | 96.43  |

***N*-[(3*S*,3*aS*)-3-Benzyl-3*a*-cyclopropyl-7-methyl-2,4-dioxo-2,3,3*a*,4-tetrahydroisoxazolo[2,3-*a*]indol-3-yl]benzamide**

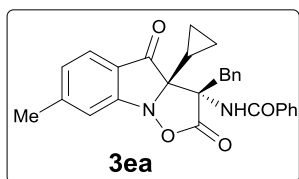

The compound **3ea** was purified by Aluminum oxide (neutral) (petroleum ether/ethyl acetate = 3/1) to afford a yellow oil in 92% yield. **UPCC** (Daicel Chiralcel. **OJ**, scCO<sub>2</sub>/MeOH = 85/15, 1.5 mL/min, λ = 254 nm), *t* (major) = 5.26 min, *t* (minor) = 6.47 min, ee = 99%. dr >19:1 (by <sup>1</sup>H NMR). [α]<sub>D</sub><sup>23</sup> = +175.5 (*c*: 0.10, in CH<sub>2</sub>Cl<sub>2</sub>). **<sup>1</sup>H NMR** (400 MHz, CDCl<sub>3</sub>) δ 7.58 – 7.51 (m, 2H), 7.48 – 7.34 (m, 6H), 7.28 – 7.24 (m, 4H), 7.07 (dd, *J* = 8.0, 1.3 Hz, 1H), 6.47 (s, 1H), 4.02 (d, *J* = 15.2 Hz, 1H), 3.57 (d, *J* = 15.2 Hz, 1H), 2.48 (s, 3H), 1.74 – 1.60 (m, 1H), 0.92 – 0.77 (m, 2H), 0.53 – 0.40 (m, 1H), 0.32 – 0.19 (m, 1H). **<sup>13</sup>C{<sup>1</sup>H} NMR** (101 MHz, CDCl<sub>3</sub>) δ 197.3, 173.6, 166.3, 161.1, 149.1, 133.4, 132.5, 132.1, 130.9, 129.2, 128.6, 128.2, 126.9, 124.1, 123.4, 120.4, 79.7, 62.6, 40.1, 22.6, 13.9, 3.7, 0.8. **IR** 3350, 1792, 1717, 1658, 112, 1580, 1520, 1485, 1454, 1314, 1268, 1229, 1177, 1139, 128, 733, 700 cm<sup>-1</sup>. **HRMS** (FTMS+c ESI) calcd for C<sub>28</sub>H<sub>24</sub>N<sub>2</sub>O<sub>4</sub> [(*M*+*H*<sup>+</sup>)] = 453.1829. Found 453.1806.

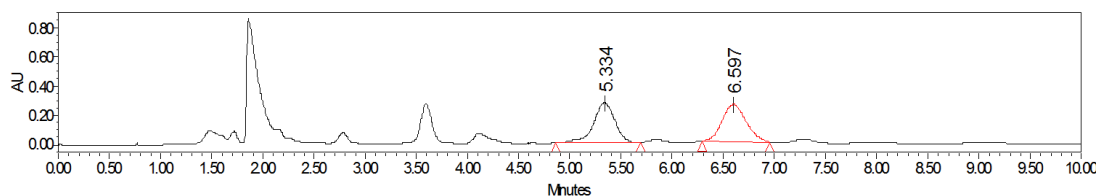

|   | Retention Time | Area    | % Area |
|---|----------------|---------|--------|
| 1 | 5.334          | 3956964 | 49.29  |
| 2 | 6.597          | 4070922 | 50.71  |

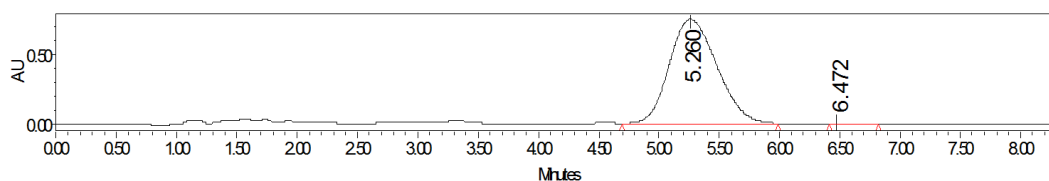

|   | Retention Time | Area     | % Area |
|---|----------------|----------|--------|
| 1 | 5.260          | 20494484 | 99.99  |
| 2 | 6.472          | 1220     | 0.01   |

***N*-[(3*S*,3*aS*)-3-Benzyl-3*a*-butyl-7-chloro-2,4-dioxo-2,3,3*a*,4-tetrahydroisoxazolo[2,3-*a*]indol-3-yl]benzamide**

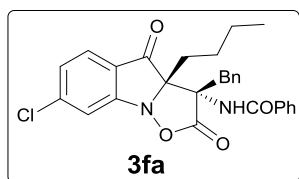

The compound **3fa** was purified by silica gel chromatography (petroleum ether/ethyl acetate = 10/1) to afford a yellow oil in 88% yield. **UPCC** (Daicel Chiralcel **OJ**, scCO<sub>2</sub>/MeOH = 90/10, 1.5 mL/min, λ = 254 nm), t (major) = 8.69 min, t (minor) = 5.99 min, ee = 80%. dr >19:1 (by <sup>1</sup>H NMR). [α]<sub>D</sub><sup>19</sup> = +319.9 (c: 0.45, in CH<sub>2</sub>Cl<sub>2</sub>). <sup>1</sup>H NMR (400 MHz, CDCl<sub>3</sub>) δ 7.64 (d, J = 1.6 Hz, 1H), 7.55 – 7.34 (m, 7H), 7.29 – 7.23 (m, 3H), 7.22 – 7.15 (m, 3H), 6.26 (s, 1H), 3.61 (d, J = 15.0 Hz, 1H), 3.43 (d, J = 15.0 Hz, 1H), 2.35 (td, J = 12.3, 4.5 Hz, 1H), 2.16 (td, J = 12.5, 3.6 Hz, 1H), 1.40 – 1.31 (m, 2H), 1.31 – 1.16 (m, 2H), 1.07 – 0.95 (m, 1H), 0.85 (t, J = 7.2 Hz, 3H). <sup>13</sup>C{<sup>1</sup>H} NMR (101 MHz, CDCl<sub>3</sub>) δ 196.8, 173.0, 166.1, 161.9, 143.8, 132.8, 132.3, 132.2, 131.0, 129.3, 128.7, 128.4, 127.8, 126.8, 125.4, 124.0, 120.6, 81.8, 62.2, 39.6, 34.0, 25.9, 23.2, 13.9. **IR** 3340, 1793, 1726, 1656, 1599, 1523, 1485, 1457, 1425, 1316, 1154, 1062, 937, 700 cm<sup>-1</sup>. **HRMS** (FTMS+c ESI) calcd for C<sub>28</sub>H<sub>25</sub>ClN<sub>2</sub>O<sub>4</sub> [(M+H)<sup>+</sup>] = 489.1576, 491.1546. Found 489.1877, 491.1541.

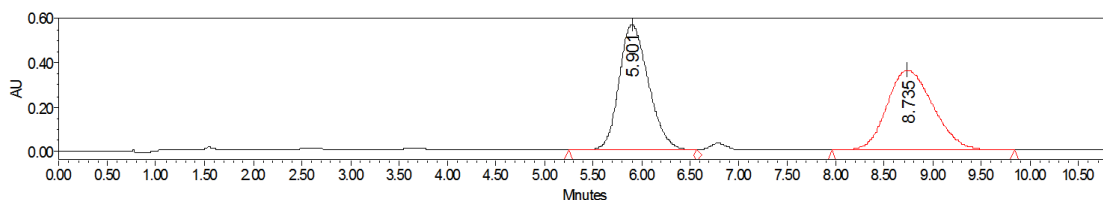

|   | Retention Time | Area     | % Area |
|---|----------------|----------|--------|
| 1 | 5.901          | 11938359 | 50.13  |
| 2 | 8.735          | 11878136 | 49.87  |

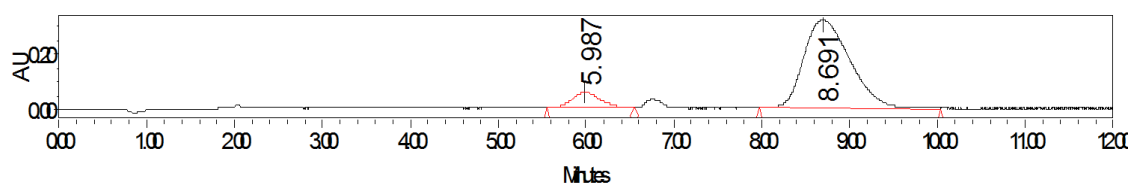

|   | Retention Time | Area     | % Area |
|---|----------------|----------|--------|
| 1 | 5.987          | 1285149  | 10.06  |
| 2 | 8.691          | 11487303 | 89.94  |



***N*-[(3*S*,3*aS*)-3-Benzyl-7-chloro-3*a*-hexyl-2,4-dioxo-2,3,3*a*,4-tetrahydroisoxazolo[2,3-*a*]indol-3-yl]benzamide**

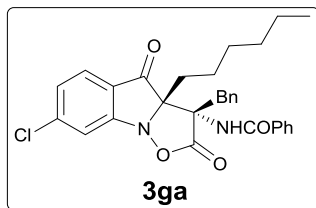

The compound **3ga** was purified by silica gel chromatography (petroleum ether/ethyl acetate = 10/1) to afford a yellow oil in 82% yield. **UPCC** (Daicel Chiralcel **ODH**, scCO<sub>2</sub>/MeOH = 60/40, 1.0 mL/min, λ = 254 nm), t (major) = 7.56 min, t (minor) = 10.33 min, ee = 80%. dr >19:1 (by <sup>1</sup>H NMR). [α]<sub>D</sub><sup>19</sup> = +321.5 (c: 0.40, in CH<sub>2</sub>Cl<sub>2</sub>). **<sup>1</sup>H NMR** (400 MHz, CDCl<sub>3</sub>) δ 7.63 (d, J = 1.6 Hz, 1H), 7.50 – 7.35 (m, 7H), 7.28 – 7.23 (m, 2H), 7.22 – 7.15 (m, 3H), 6.26 (s, 1H), 3.60 (d, J = 15.0 Hz, 1H), 3.43 (d, J = 15.0 Hz, 1H), 2.45 – 2.25 (m, 1H), 2.15 (td, J = 12.5, 3.1 Hz, 1H), 1.33 – 1.18 (m, 7H), 1.08 – 0.97 (m, 1H), 0.84 (t, J = 6.8 Hz, 3H). **<sup>13</sup>C{<sup>1</sup>H} NMR** (101 MHz, CDCl<sub>3</sub>) δ 13C NMR (101 MHz, CDCl<sub>3</sub>) δ 196.8, 173.0, 166.1, 161.9, 143.7, 132.8, 132.3, 132.2, 131.0, 129.2, 128.7, 128.4, 127.7, 126.8, 125.4, 124.0, 120.5, 81.9, 62.2, 39.6, 34.2, 31.5, 29.7, 23.8, 22.6, 14.1. **IR** 3338, 1794, 1726, 1655, 1599, 1525, 1486, 1456, 1316, 1157, 1062, 700 cm<sup>-1</sup>. **HRMS** (FTMS+c ESI) calcd for C<sub>30</sub>H<sub>29</sub>ClN<sub>2</sub>O<sub>4</sub> [(M+H)<sup>+</sup>] = 517.1889, 519.1859. Found 517.1890, 519.1851.

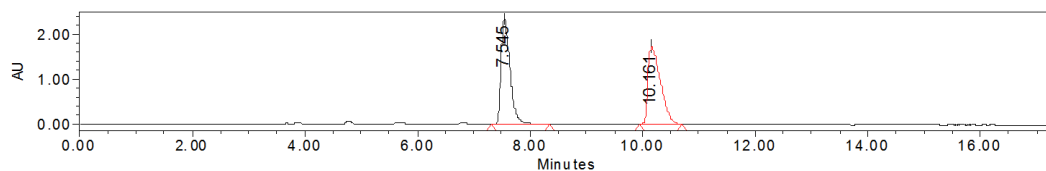

|   | Retention Time | Area     | % Area |
|---|----------------|----------|--------|
| 1 | 7.545          | 26170315 | 49.51  |
| 2 | 10.161         | 26685709 | 50.49  |

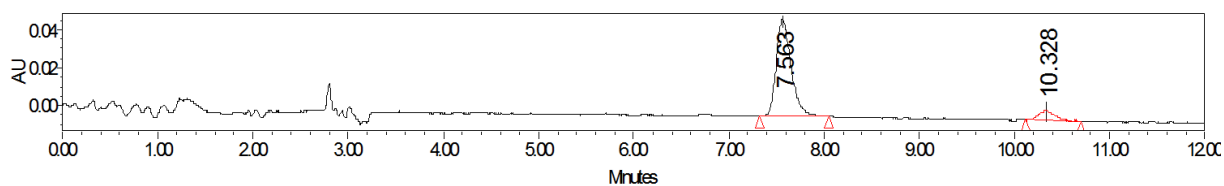

|   | Retention Time | Area   | % Area |
|---|----------------|--------|--------|
| 1 | 7.563          | 553280 | 90.19  |
| 2 | 10.328         | 60148  | 9.81   |

***N*-[(3*S*,3*aS*)-3-Benzyl-7-chloro-3*a*-decyl-2,4-dioxo-2,3,3*a*,4-tetrahydroisoxazolo[2,3-*a*]indol-3-yl]benzamide**

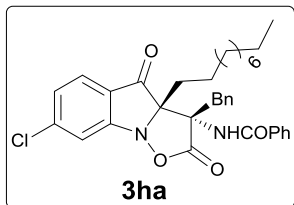

The compound **3ha** was purified by silica gel chromatography (petroleum ether/ethyl acetate = 10/1) to afford a yellow oil in 90% yield. **UPCC** (Daicel Chiralcel **ODH**, scCO<sub>2</sub>/MeOH = 60/40, 1.0 mL/min, λ = 254 nm), t (major) = 9.15 min, t (minor) = 10.26 min, ee = 81%. dr >19:1 (by <sup>1</sup>H NMR). [α]<sub>D</sub><sup>19</sup> = +331.6 (c: 0.72, in CH<sub>2</sub>Cl<sub>2</sub>). <sup>1</sup>H NMR (400 MHz, CDCl<sub>3</sub>) δ 7.63 (d, J = 1.6 Hz, 1H), 7.51 – 7.34 (m, 7H), 7.29 – 7.22 (m, 2H), 7.22 – 7.15 (m, 3H), 6.28 (s, 1H), 3.60 (d, J = 15.0 Hz, 1H), 3.43 (d, J = 15.0 Hz, 1H), 2.40 – 2.27 (m, 1H), 2.15 (td, J = 12.5, 3.0 Hz, 1H), 1.31 – 1.16 (m, 15H), 1.08 – 0.97 (m, 1H), 0.86 (t, J = 6.8 Hz, 3H). <sup>13</sup>C{<sup>1</sup>H} NMR (101 MHz, CDCl<sub>3</sub>) δ 196.8, 173.0, 166.1, 161.9, 143.7, 132.8, 132.3, 132.2, 131.0, 129.2, 128.7, 128.4, 127.7, 126.8, 125.4, 124.0, 120.5, 81.9, 62.2, 39.6, 34.2, 32.0, 30.0, 29.6, 29.56, 29.4, 23.9, 22.8, 14.2. **IR** 3348, 1794, 1727, 1653, 1599, 1524, 1486, 1457, 1316, 1158, 1062, 700 cm<sup>-1</sup>. **HRMS** (FTMS+c ESI) calcd for C<sub>34</sub>H<sub>37</sub>ClN<sub>2</sub>O<sub>4</sub> [(M+H)<sup>+</sup>] = 573.2515, 575.2485. Found 573.2510, 575.2487.

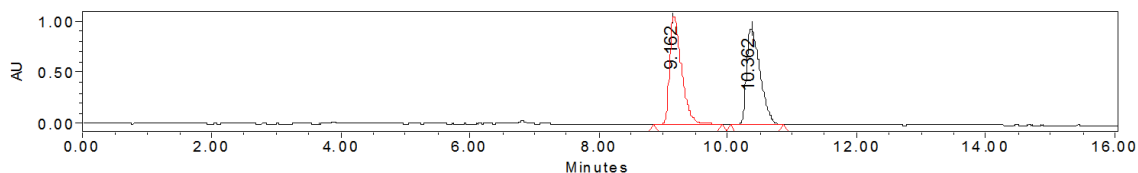

|   | Retention Time | Area     | % Area |
|---|----------------|----------|--------|
| 1 | 9.162          | 13427959 | 49.77  |
| 2 | 10.362         | 13553975 | 50.23  |

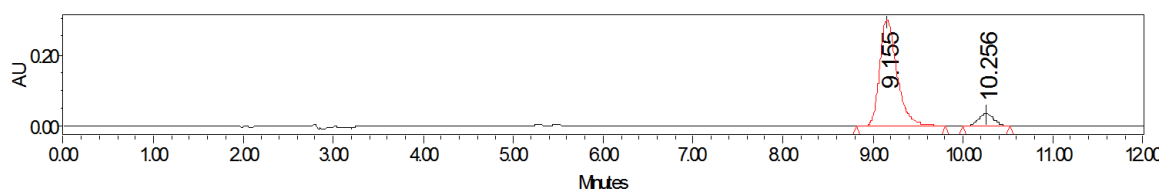

|   | Retention Time | Area    | % Area |
|---|----------------|---------|--------|
| 1 | 9.155          | 3999246 | 90.51  |
| 2 | 10.256         | 419362  | 9.49   |

***N*-[(3*S*,3*aS*)-3-Benzyl-7-chloro-3*a*-(3-chloropropyl)-2,4-dioxo-2,3,3*a*,4-tetrahydroisoxazolo[2,3-*a*]indol-3-yl]benzamide**

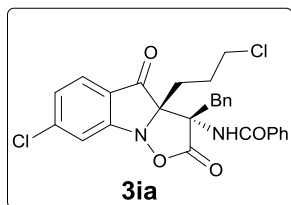

The compound **3ia** was purified by silica gel chromatography (petroleum ether/ethyl acetate = 5/1) to afford a yellow oil in 99% yield. **UPCC** (Daicel Chiralcel **OX**, scCO<sub>2</sub>/MeOH = 80/20, 1.5 mL/min, λ = 254 nm), *t* (major) = 3.75 min, *t* (minor) = 4.76 min, ee = 71%. dr >19:1 (by <sup>1</sup>H NMR). [α]<sub>D</sub><sup>20</sup> = +293.7 (*c*: 1.01, in CH<sub>2</sub>Cl<sub>2</sub>). <sup>1</sup>H NMR (400 MHz, CDCl<sub>3</sub>) δ 7.64 (d, *J* = 1.7 Hz, 1H), 7.52 – 7.35 (m, 7H), 7.28 – 7.24 (m, 3H), 7.22 – 7.16 (m, 3H), 6.30 (s, 1H), 3.60 (d, *J* = 15.1 Hz, 1H), 3.53 (t, *J* = 6.2 Hz, 2H), 3.45 (d, *J* = 15.0 Hz, 1H), 2.52 (ddd, *J* = 13.0, 11.6, 4.6 Hz, 1H), 2.35 (td, *J* = 12.4, 3.9 Hz, 1H), 1.83 – 1.70 (m, 1H), 1.60 – 1.47 (m, 1H). <sup>13</sup>C{<sup>1</sup>H} NMR (101 MHz, CDCl<sub>3</sub>) δ 196.2, 172.8, 166.1, 161.8, 144.1, 132.5, 132.4, 132.0, 131.0, 129.3, 128.7, 128.5, 127.9, 126.8, 125.1, 124.1, 120.6, 81.4, 62.2, 44.6, 39.7, 31.6, 26.9. **IR** 3351, 1792, 1725, 1656, 1598, 1523, 1485, 456, 1426, 1316, 1267, 1221, 158, 1135, 1063 700 cm<sup>-1</sup>. **HRMS** (FTMS+c ESI) calcd for C<sub>27</sub>H<sub>22</sub>Cl<sub>2</sub>N<sub>2</sub>O<sub>4</sub> [(M+H)<sup>+</sup>] = 509.1029, 511.1000, 513.0970. Found 509.1017, 511.0987, 513.0972.

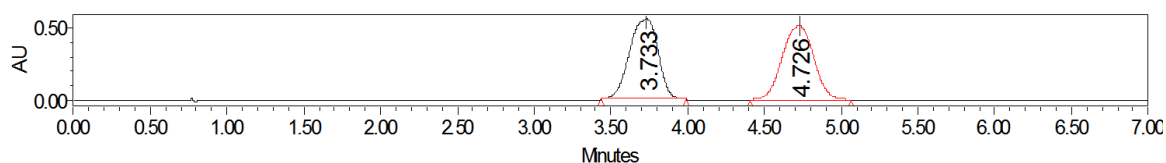

|   | Retention Time | Area    | % Area |
|---|----------------|---------|--------|
| 1 | 3.733          | 7225243 | 49.95  |
| 2 | 4.726          | 7239162 | 50.05  |

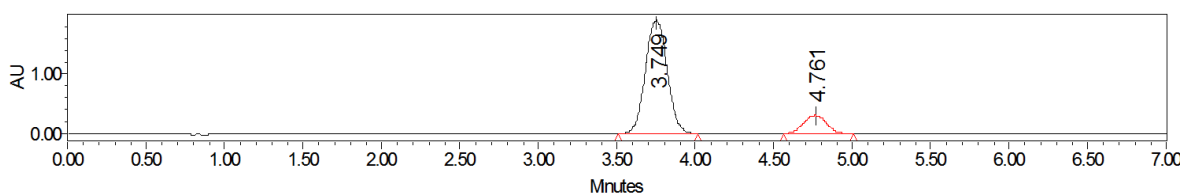

|   | Retention Time | Area     | % Area |
|---|----------------|----------|--------|
| 1 | 3.749          | 18252666 | 85.32  |
| 2 | 4.761          | 3139470  | 14.68  |

***N*-[(3*S*,3*aS*)-3-Benzyl-7-chloro-2,4-dioxo-3*a*-(3-phenylpropyl)-2,3,3*a*,4-tetrahydroisoxazol[2,3-*a*]indol-3-yl]benzamide**

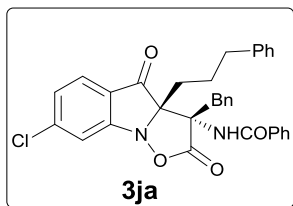

The compound **3ja** was purified by silica gel chromatography (petroleum ether/ethyl acetate = 10/1) to afford a yellow oil in 99% yield. **UPCC** (Daicel Chiralcel **OX**, scCO<sub>2</sub>/MeOH = 80/20, 1.5 mL/min, λ = 254nm), t (major) = 5.39 min, t (minor) = 6.75 min, ee = 80%. dr >19:1 (by <sup>1</sup>H NMR). [α]<sub>D</sub><sup>19</sup> = +261.2 (c: 1.03, in CH<sub>2</sub>Cl<sub>2</sub>). <sup>1</sup>H NMR (400 MHz, CDCl<sub>3</sub>) δ 7.61 (d, J = 1.7 Hz, 1H), 7.43 – 7.34 (m, 7H), 7.28 – 7.22 (m, 5H), 7.22 – 7.15 (m, 4H), 7.14 – 7.08 (m, 2H), 6.30 (s, 1H), 3.54 (d, J = 15.0 Hz, 1H), 3.39 (d, J = 15.0 Hz, 1H), 2.63 (t, J = 7.6 Hz, 2H), 2.37 (td, J = 12.5, 4.4 Hz, 1H), 2.20 (td, J = 12.6, 3.9 Hz, 1H), 1.70 – 1.56 (m, 1H), 1.44 – 1.29 (m, 1H). <sup>13</sup>C{<sup>1</sup>H} NMR (101 MHz, CDCl<sub>3</sub>) δ 196.6, 172.9, 166.1, 161.9, 143.8, 141.1, 132.6, 132.3, 132.1, 131.0, 129.2, 128.7, 128.6, 128.5, 128.4, 127.8, 126.8, 126.2, 125.3, 124.0, 120.5, 81.7, 62.2, 39.5, 36.0, 33.7, 25.6. **IR** 3339, 1793, 1725, 1658, 1599, 1522, 1485, 1455, 1426, 1317, 1266, 1224, 1158, 1135, 1063, 700 cm<sup>-1</sup>. **HRMS** (FTMS+c ESI) calcd for C<sub>33</sub>H<sub>27</sub>ClN<sub>2</sub>O<sub>4</sub> [(M+H<sup>+</sup>)] = 551.1732, 553.1703, Found 551.1725, 553.1694.

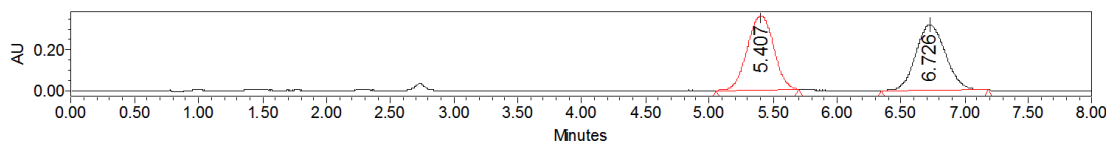

|   | Retention Time | Area    | % Area |
|---|----------------|---------|--------|
| 1 | 5.407          | 5182741 | 50.07  |
| 2 | 6.726          | 5169171 | 49.93  |

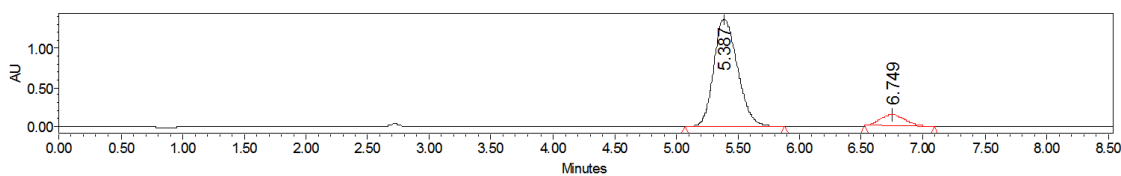

|   | Retention Time | Area     | % Area |
|---|----------------|----------|--------|
| 1 | 5.387          | 18311691 | 89.95  |
| 2 | 6.749          | 2045930  | 10.05  |

***N*-[(3*S*,3*aS*)-3-Benzyl-7-chloro-3*a*-cyclopentyl-2,4-dioxo-2,3,3*a*,4-tetrahydroisoxazolo[2,3-*a*]indol-3-yl]benzamide**

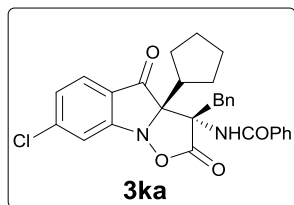

The compound **3ka** was purified by silica gel chromatography (petroleum ether/ethyl acetate = 10/1) to afford a yellow oil in 89% yield. **UPCC** (Daicel Chiralcel **OX**, scCO<sub>2</sub>/MeOH = 90/10, 1.5 mL/min, λ = 254nm), *t* (major) = 10.92 min, *t* (minor) = 13.01 min, ee = 59%. dr >19:1 (by <sup>1</sup>H NMR). [α]<sub>D</sub><sup>19</sup> = +244.6 (*c*: 0.86, in CH<sub>2</sub>Cl<sub>2</sub>). <sup>1</sup>H NMR (400 MHz, CDCl<sub>3</sub>) δ 7.67 – 7.55 (m, 3H), 7.49 – 7.42 (m, 2H), 7.41 – 7.32 (m, 2H), 7.31 – 7.26 (m, 1H), 7.17 (t, *J* = 7.7 Hz, 2H), 7.09 – 7.01 (m, 1H), 6.97 – 6.88 (m, 2H), 5.93 (d, *J* = 3.7 Hz, 1H), 3.65 (d, *J* = 15.1 Hz, 1H), 3.56 (d, *J* = 15.1 Hz, 1H), 3.07 – 2.86 (m, 1H), 2.04 – 1.91 (m, 1H), 1.85 – 1.65 (m, 5H), 1.56 – 1.46 (m, 1H), 1.26 – 1.12 (m, 1H). <sup>13</sup>C{<sup>1</sup>H} NMR (101 MHz, CDCl<sub>3</sub>) δ 196.0, 174.0, 164.9, 162.3, 143.7, 132.8, 132.0, 131.2, 129.3, 128.5, 128.3, 126.6, 126.4, 124.0, 123.8, 119.4, 85.6, 61.3, 42.9, 40.2, 28.7, 28.2, 26.2, 25.3. **IR** 3348, 1796, 1721, 1672, 1600, 1514, 1483, 1316, 1063, 1288, 1141 cm<sup>-1</sup>. **HRMS** (FTMS+c ESI) calcd for C<sub>29</sub>H<sub>25</sub>ClN<sub>2</sub>O<sub>4</sub> [(*M*+*H*<sup>+</sup>)] = 501.1576, 503.1546, Found 501.1558, 503.1546.

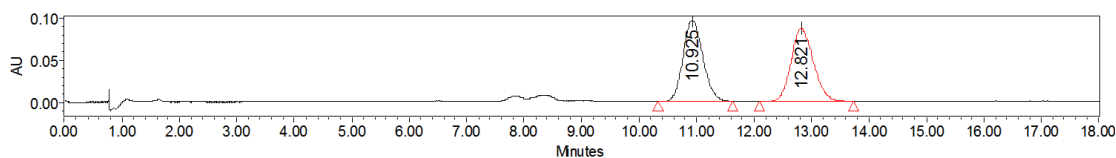

|   | RetentionTime | Area    | % Area |
|---|---------------|---------|--------|
| 1 | 10.925        | 2330844 | 49.86  |
| 2 | 12.821        | 2343992 | 50.14  |

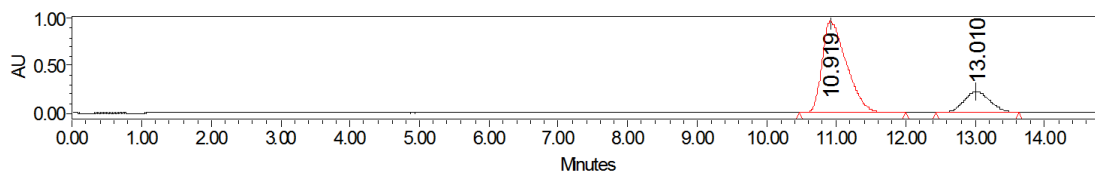

|   | RetentionTime | Area     | % Area |
|---|---------------|----------|--------|
| 1 | 10.919        | 23520009 | 79.73  |
| 2 | 13.010        | 5978033  | 20.27  |

***N*-[(3*S*,3*aS*)-3-Benzyl-7-chloro-2,4-dioxo-3*a*-phenyl-2,3,3*a*,4-tetrahydroisoxazolo[2,3-*a*]indol-3-yl]benzamide**

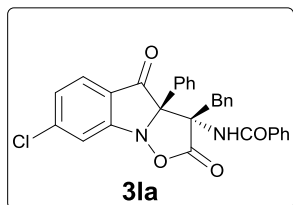

The compound **3la** was purified by silica gel chromatography (petroleum ether/ethyl acetate = 5/1) to afford a pale yellow solid in 18% yield. **UPCC** (Daicel Chiralcel **OX**, scCO<sub>2</sub>/MeOH = 80/20, 1.5 mL/min, λ = 254 nm), t (major) = 5.26 min, t (minor) = 4.40 min, ee = 15%. dr >19:1 (by <sup>1</sup>H NMR). <sup>1</sup>H NMR (400 MHz, CDCl<sub>3</sub>) δ 7.92 – 7.83 (m, 2H), 7.74 (d, J = 1.6 Hz, 1H), 7.61 – 7.46 (m, 4H), 7.43 – 7.32 (m, 6H), 7.28 – 7.19 (m, 4H), 6.97 – 6.87 (m, 2H), 6.75 (s, 1H), 3.05 (d, J = 14.5 Hz, 1H), 2.96 (d, J = 14.5 Hz, 1H). <sup>13</sup>C{<sup>1</sup>H} NMR (101 MHz, CDCl<sub>3</sub>) δ 195.1, 171.2, 167.8, 159.5, 143.0, 134.2, 132.4, 132.1, 130.6, 129.3, 129.0, 128.9, 128.7, 128.5, 128.1, 127.3, 127.1, 125.7, 125.3, 122.3, 79.4, 64.6, 42.2, 0.0. **IR** 3343, 1785, 1730, 1651, 1597, 1523, 1485, 1447, 1313, 1262, 1224, 1153, 1063, 731, 701 cm<sup>-1</sup>. **HRMS** (FTMS+c ESI) calcd for C<sub>30</sub>H<sub>21</sub>ClN<sub>2</sub>O<sub>4</sub> [(M+H)<sup>+</sup>] = 509.1263, 511.1233, Found 509.1269, 511.1251.

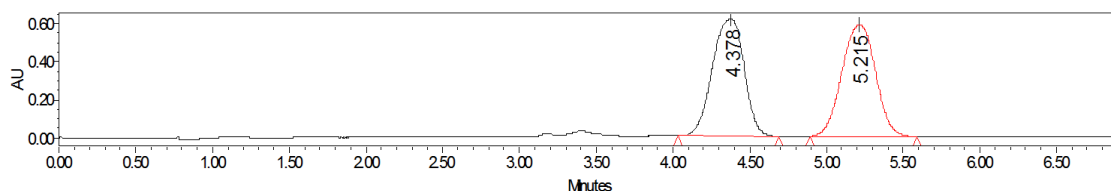

|   | Retention Time | Area    | % Area |
|---|----------------|---------|--------|
| 1 | 4.378          | 8883316 | 49.62  |
| 2 | 5.215          | 9018663 | 50.38  |

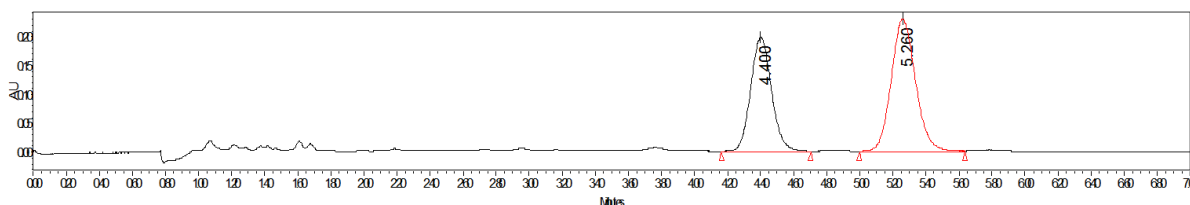

|   | Retention Time | Area    | % Area |
|---|----------------|---------|--------|
| 1 | 4.400          | 1725896 | 42.45  |
| 2 | 5.260          | 2339484 | 57.55  |

***N*-[(3*S*,3*aS*)-3-Benzyl-7-chloro-2,4-dioxo-3*a*-(thiophen-2-yl)-2,3,3*a*,4-tetrahydroisoxazolo[2,3-*a*]indol-3-yl]benzamide**

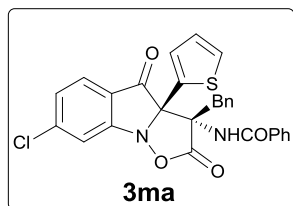

The compound **3ma** was purified by silica gel chromatography (petroleum ether/ethyl acetate = 5/1) to afford a pale yellow solid in 52% yield. **UPCC** (Daicel Chiralcel **OX**, scCO<sub>2</sub>/MeOH = 80/20, 1.5 mL/min, λ = 254 nm), *t* (major) = 4.96 min, *t* (minor) = 5.81 min, ee = 13%. dr >19:1 (by <sup>1</sup>H NMR). <sup>1</sup>H NMR (400 MHz, CDCl<sub>3</sub>) δ 7.86 – 7.63 (m, 2H), 7.62 – 7.45 (m, 5H), 7.44 – 7.32 (m, 4H), 7.32 – 7.26 (m, 3H), 7.11 – 6.90 (m, 2H), 6.69 (s, 1H), 3.05 (d, *J* = 2.4 Hz, 2H). <sup>13</sup>C{<sup>1</sup>H} NMR (101 MHz, CDCl<sub>3</sub>) δ 194.5, 171.4, 167.7, 159.8, 143.1, 134.6, 132.4, 132.3, 132.3, 130.6, 129.2, 128.7, 128.7, 128.1, 127.2, 127.1, 126.8, 125.4, 125.2, 124.9, 122.2, 79.6, 64.1, 41.7. **IR** 3367, 1788, 1733, 1654, 1608, 1521, 1486, 1315, 1263, 1224, 1149, 1063, 779, 701 cm<sup>-1</sup>. **HRMS** (FTMS+c ESI) calcd for C<sub>28</sub>H<sub>19</sub>SCIN<sub>2</sub>O<sub>4</sub> [(*M*+H<sup>+</sup>)] = 515.0827, 517.0797. Found 515.0823, 517.0807.

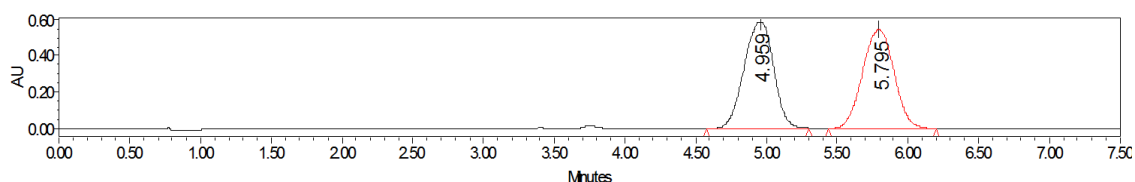

|   | Retention Time | Area    | % Area |
|---|----------------|---------|--------|
| 1 | 4.959          | 8440981 | 50.12  |
| 2 | 5.795          | 8401847 | 49.88  |

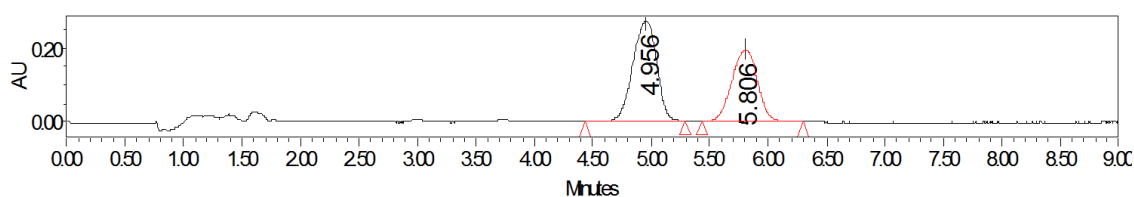

|   | Retention Time | Area    | % Area |
|---|----------------|---------|--------|
| 1 | 4.956          | 3864797 | 56.58  |
| 2 | 5.806          | 2966263 | 43.42  |

## Chiral guanidine G-6

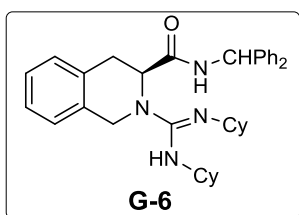

**<sup>1</sup>H NMR** (400 MHz, CDCl<sub>3</sub>) δ 10.51 (d, *J* = 8.4 Hz, 1H), 7.32 – 7.04 (m, 14H), 6.96 (d, *J* = 7.4 Hz, 1H), 6.17 (d, *J* = 7.9 Hz, 1H), 4.80 (d, *J* = 6.3 Hz, 1H), 4.34 (d, *J* = 16.5 Hz, 1H), 4.13 (d, *J* = 16.5 Hz, 1H), 3.51 – 3.28 (m, 2H), 3.03 – 2.84 (m, 3H), 1.91 (d, *J* = 11.4 Hz, 1H), 1.80 (d, *J* = 12.5 Hz, 1H), 1.71 – 1.42 (m, 9H), 1.28 – 0.85 (m, 10H). **<sup>13</sup>C{<sup>1</sup>H} NMR** (101 MHz, CDCl<sub>3</sub>) δ 171.7, 155.7, 142.6, 142.5, 134.4, 132.6, 129.0, 128.3, 128.2, 127.8, 127.7, 126.9, 126.8, 126.5, 125.7, 125.4, 56.9, 55.8, 55.4, 53.7, 47.3, 35.5, 35.2, 34.6, 33.8, 29.6, 25.7, 25.5, 25.2, 25.1, 24.8. [α]<sub>D</sub><sup>27</sup> = –23.5 (*c*: 0.31, in CH<sub>2</sub>Cl<sub>2</sub>). mp 72.0–79.3 °C. **IR** 2926, 2851, 2360, 1668, 1616, 1450, 1402, 1226, 740, 698 cm<sup>-1</sup>. **HRMS** (FTMS+c ESI) calcd for C<sub>36</sub>H<sub>44</sub>N<sub>4</sub>O [(M+H<sup>+</sup>)] = 549.3588. Found 549.3591.

## (S)-2-(4-bromobenzamido)-2-[(S)-2-cyclopropyl-3-oxoindolin-2-yl]-3-phenylpropanoic acid

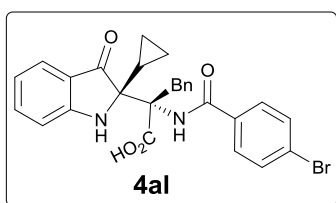

The **3al** (0.2 mmol, 103.2mg) in aqueous dioxane (10% v/v) was added to a suspension of 10% palladium on carbon in aqueous dioxane (10% v/v). The sample was placed in H<sub>2</sub> gas under the ambient pressure, and stirred at room temperature for 12 h. The solution was filtered through celite (solvent: DCM), and concentrated under reduced pressure. And then the mixture was purified by silica gel chromatography (ethyl acetate/MeOH = 10/1) to afford the compound **4al** (yellow solid, 84% yield). **UPCC** (Daicel Chiralcel **AD**, scCO<sub>2</sub>/MeOH = 80/20, 1.5 mL/min, λ = 254 nm), *t* (major) = 10.33 min, *t* (minor) = 12.65 min, ee = 91%. dr >19:1 (by <sup>1</sup>H NMR). **<sup>1</sup>H NMR** (400 MHz, DMSO-d<sub>6</sub>) δ 8.38 (s, 1H), 7.55 (d, *J* = 8.0 Hz, 2H), 7.44 – 7.19 (m, 6H), 7.11 – 6.85 (m, 5H), 6.66 (t, *J* = 7.3 Hz, 1H), 3.94 (d, *J* = 13.0 Hz, 1H), 3.36 (d, *J* = 13.1 Hz, 1H), 1.64 – 1.51 (m, 1H), 0.53 – 0.28 (m, 2H), 0.12 – -0.03 (m, 1H), -0.24 – -0.41 (m, 1H). **<sup>13</sup>C{<sup>1</sup>H} NMR** δ 201.4, 169.6, 165.8, 161.1, 138.3, 136.4, 135.3, 131.4, 130.5, 128.4, 127.2, 125.6, 124.5, 123.9, 121.8, 117.5, 112.1, 73.0, 70.3, 33.1, 13.6, 2.6, -1.6. [α]<sub>D</sub><sup>22</sup> = –24.3 (*c*: 0.50, in CH<sub>2</sub>Cl<sub>2</sub>). **IR** 3333, 1615, 1475, 1382, 1297, 1224, 1167, 1115, 1075, 1027, 881, 755, 703, 666, 630, 576, 516 cm<sup>-1</sup>. **HRMS** (FTMS+c ESI) calcd for C<sub>27</sub>H<sub>23</sub>BrN<sub>2</sub>O<sub>4</sub> [(M+H<sup>+</sup>)] = 519.0914, 521.0893. Found 519.0920, 521.0901.

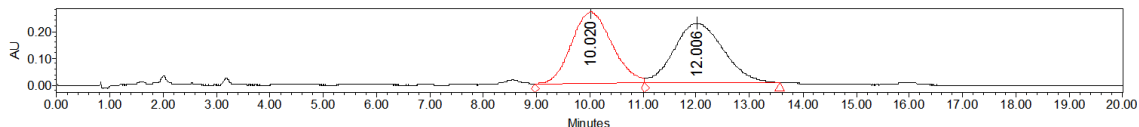

|   | Retention Time | Area     | % Area |
|---|----------------|----------|--------|
| 1 | 10.020         | 14202375 | 49.74  |
| 2 | 12.006         | 14351080 | 50.26  |



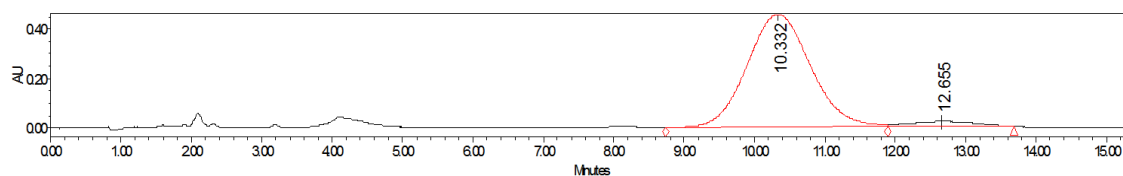

|   | Retention Time | Area     | % Area |
|---|----------------|----------|--------|
| 1 | 10.332         | 28654756 | 95.40  |
| 2 | 12.655         | 1380520  | 4.60   |

## 7. Crystallographic data and analysis results of 2D NMR spectra for **3ca**.

CCDC 1972984

**3ca** was recrystallized from mixed solvents of Et<sub>2</sub>O, *n*-hexane, isopropanol at  $-20\text{ }^{\circ}\text{C}$ . The absolute configuration of the product **3ca** was determined to be (3*S*, 3*aS*) according to X-ray crystal structural analysis.

---

|                                             |                                                                  |
|---------------------------------------------|------------------------------------------------------------------|
| Formula                                     | C <sub>27</sub> H <sub>21</sub> Cl N <sub>2</sub> O <sub>4</sub> |
| Formula mass (amu)                          | 472.91                                                           |
| Space group                                 | <i>P</i> 2 <sub>1</sub> / <i>n</i>                               |
| <i>a</i> (Å)                                | 11.6645(7)                                                       |
| <i>b</i> (Å)                                | 10.8473(7)                                                       |
| <i>c</i> (Å)                                | 18.3820(11)                                                      |
| $\alpha$ (deg)                              | 90                                                               |
| $\beta$ (deg)                               | 97.004(4)                                                        |
| $\gamma$ (deg)                              | 90                                                               |
| <i>V</i> (Å <sup>3</sup> )                  | 2308.5(2)                                                        |
| <i>Z</i>                                    | 4                                                                |
| $\lambda$ (Å)                               | 1.54178                                                          |
| <i>T</i> (K)                                | 203 (2)                                                          |
| $\rho_{\text{calcd}}$ (g cm <sup>-3</sup> ) | 1.361                                                            |
| $\mu$ (mm <sup>-1</sup> )                   | 1.775                                                            |
| Transmission factors                        | 0.739,0.956                                                      |

|                                                   |        |
|---------------------------------------------------|--------|
| $2\theta_{\max}$ (deg)                            | 69.066 |
| No. of unique data, including $F_o^2 < 0$         | 4243   |
| No. of unique data, with $F_o^2 > 2\sigma(F_o^2)$ | 2177   |
| No. of variables                                  | 311    |
| $R(F)$ for $F_o^2 > 2\sigma(F_o^2)$ <sup>a</sup>  | 0.0844 |
| $R_w(F_o^2)$ <sup>b</sup>                         | 0.2974 |
| Goodness of fit                                   | 0.997  |

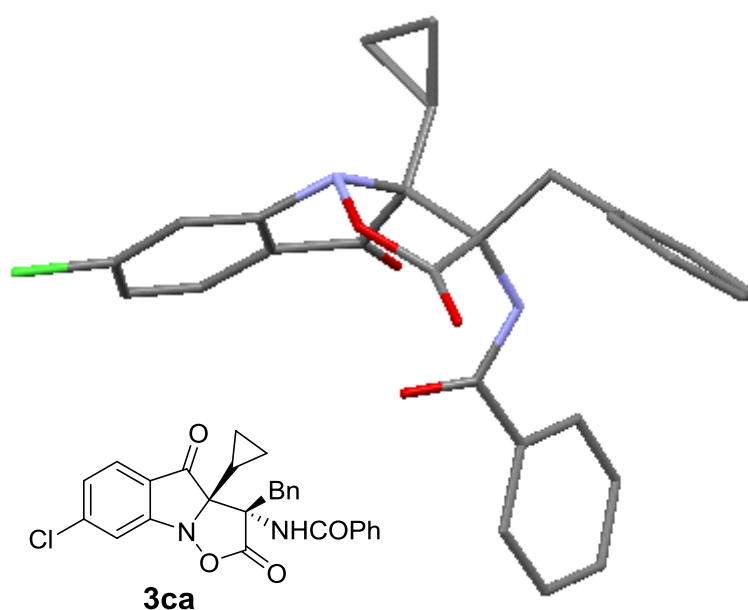

Analysis results of 2D NMR spectra of the product 3ja

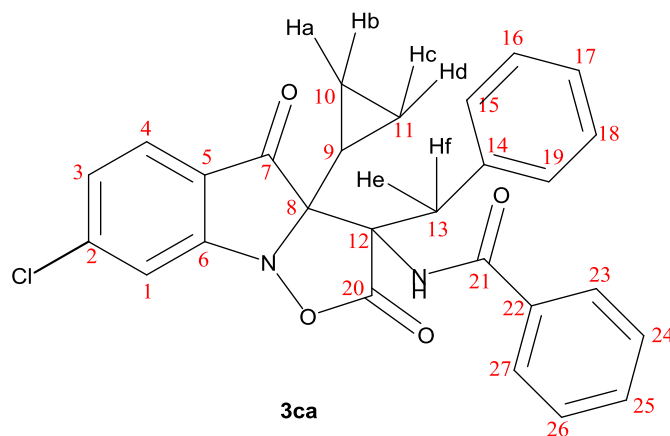

**HSQC**-Correlation Peak: (7.57, 120.31); (3.60, 39.96); (4.00, 39.79); (1.63, 13.80); (0.85, 3.52); (0.48, 0.77); (0.26, 0.76).

**HMBC**-Correlation Peak: (7.57, 143.53); (7.57, 161.13); (7.46, 196.40); (6.54, 166.34); (6.54, 62.43); (6.55, 40.02); (3.97, 173.12); (3.97, 62.36); (4.04, 78.92); (3.60, 173.09); (3.60, 80.11); (3.56, 62.33); (1.63, 79.83); (0.86, 79.74); (0.88, 13.58); (0.48, 80.00); (0.26, 79.71); (0.26, 13.89).

| Number of Atom         | H                                                         | C                     |
|------------------------|-----------------------------------------------------------|-----------------------|
| 1, 3, 4                | 7.59-7.51 (m,3H)                                          | 120.5, 143.53, 161.13 |
| 2, 5, 6                | --                                                        | can't be sure         |
| 7                      | --                                                        | 166.5                 |
| 8                      | --                                                        | 62.4                  |
| 10, 11                 | 0.95-0.75 (m, 2H), 0.55-0.43 (tt, 1H), 0.32-0.20 (dq, 1H) | 0.8, 3.7              |
| 9                      | 1.63 (tt, 1H)                                             | 13.9                  |
| 12                     | --                                                        | 79.9                  |
| 13                     | 4.04-3.53 (dd, 2H)                                        | 40.0                  |
| 14, 15, 16, 17, 18, 19 | 7.5.-7.35 (m, 5H)                                         | can't be sure         |
| 20                     | --                                                        | 173.3                 |
| 21                     | --                                                        | 196.5                 |
| 22, 23, 24, 25, 26, 27 | 7.30-7.20 (m, 5H)                                         | can't be sure         |
| NH                     | 6.51 (s, 1H)                                              | --                    |

## 8. NMR spectra

$^1\text{H}$  NMR (400 MHz) and  $^{13}\text{C}\{^1\text{H}\}$  NMR (101 MHz),  $\text{CDCl}_3$ , compound **3aa**

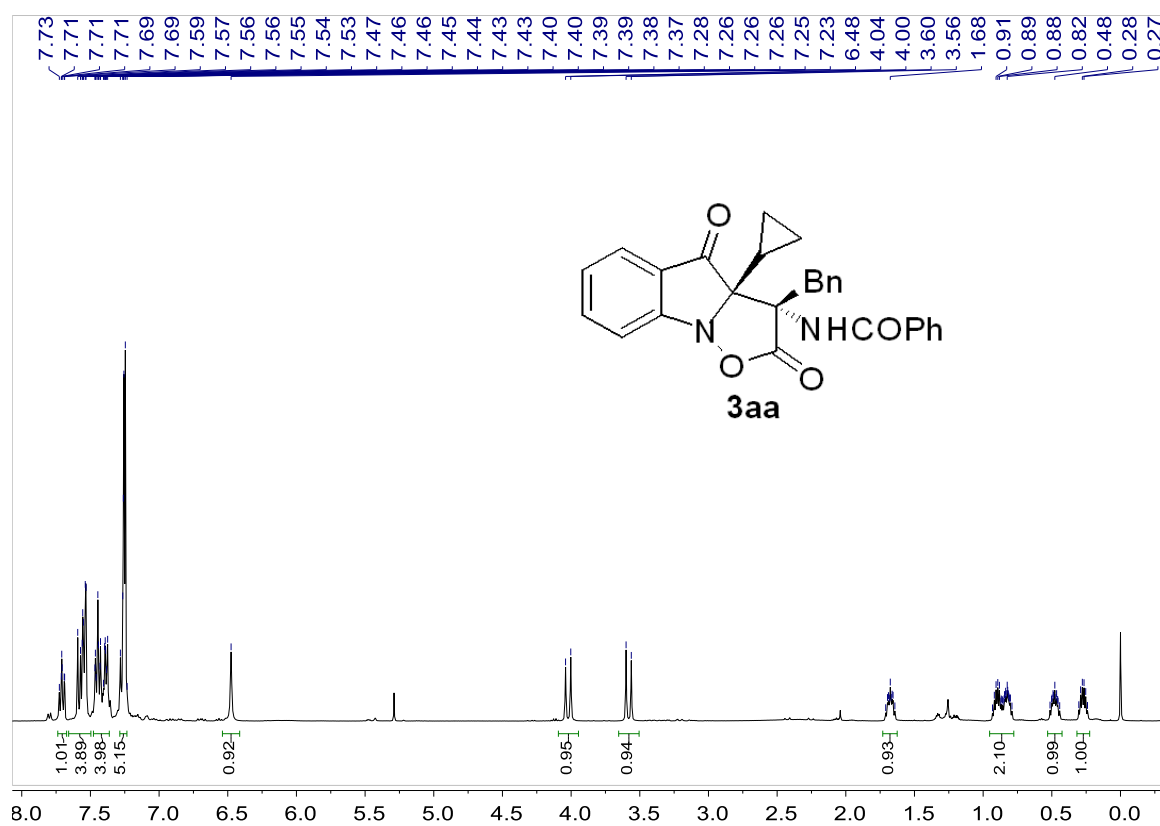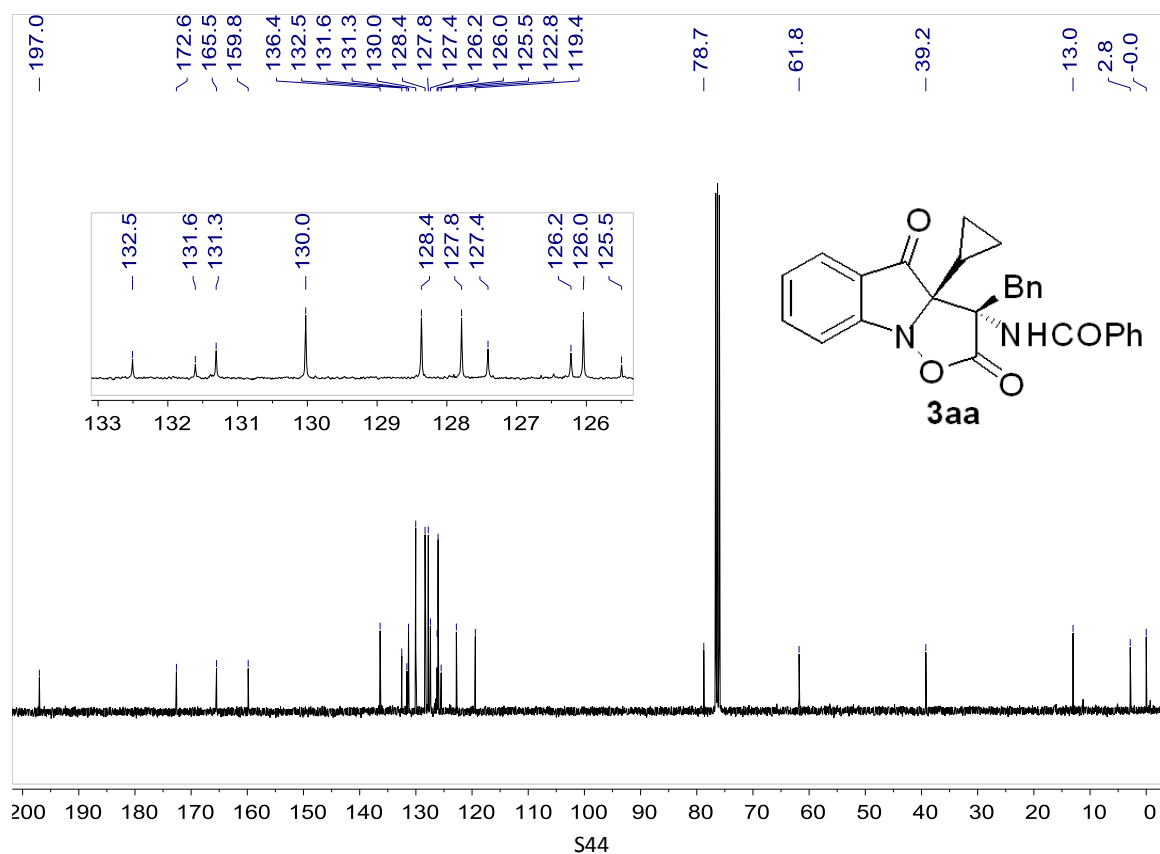

$^1\text{H}$  NMR (400 MHz) and  $^{13}\text{C}\{^1\text{H}\}$  NMR (101 MHz),  $\text{CDCl}_3$ , compound **3ab**

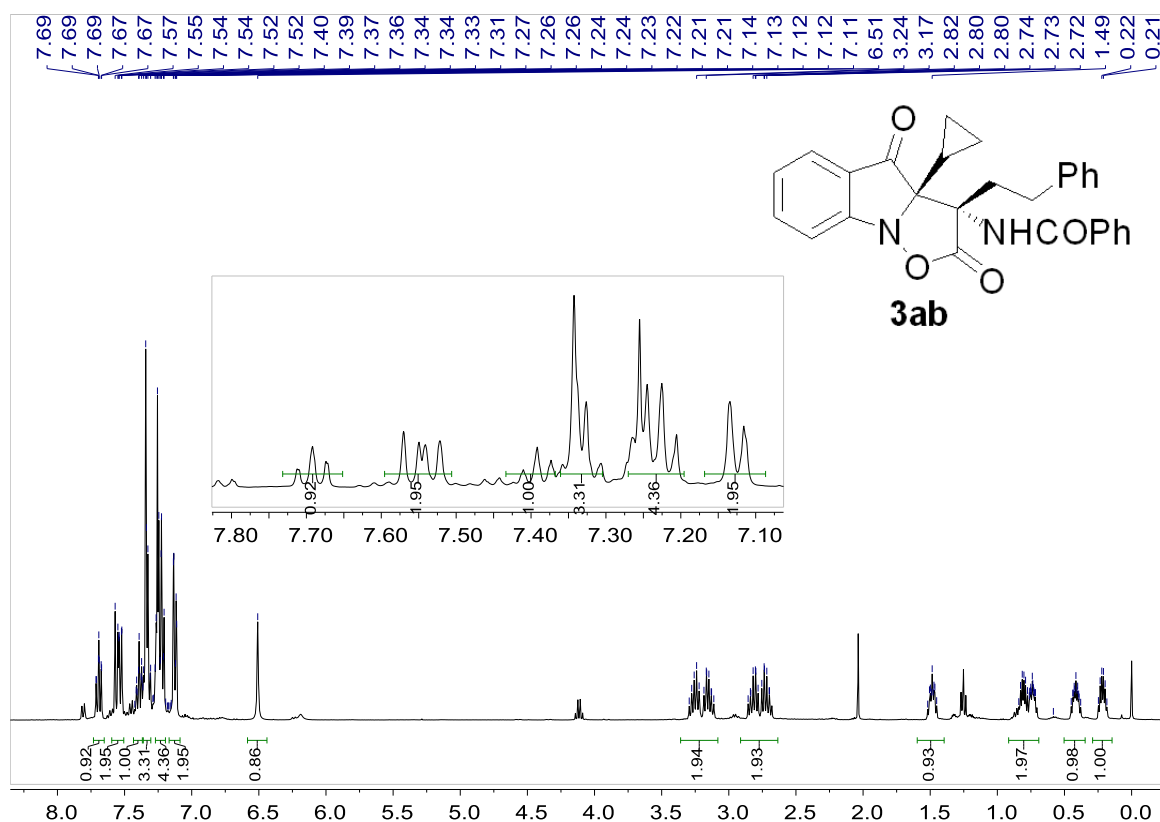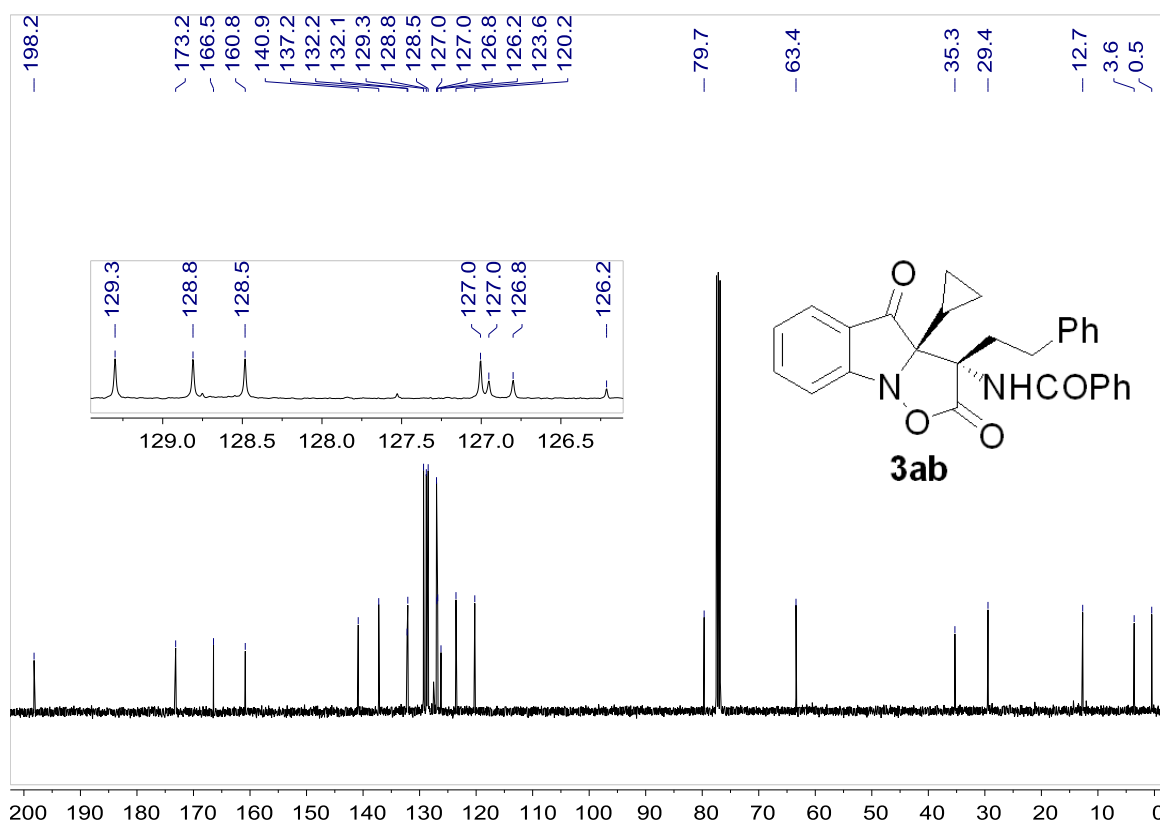

$^1\text{H}$  NMR (400 MHz) and  $^{13}\text{C}$ { $^1\text{H}$ } NMR (101 MHz), MeOD, compound **3ac**

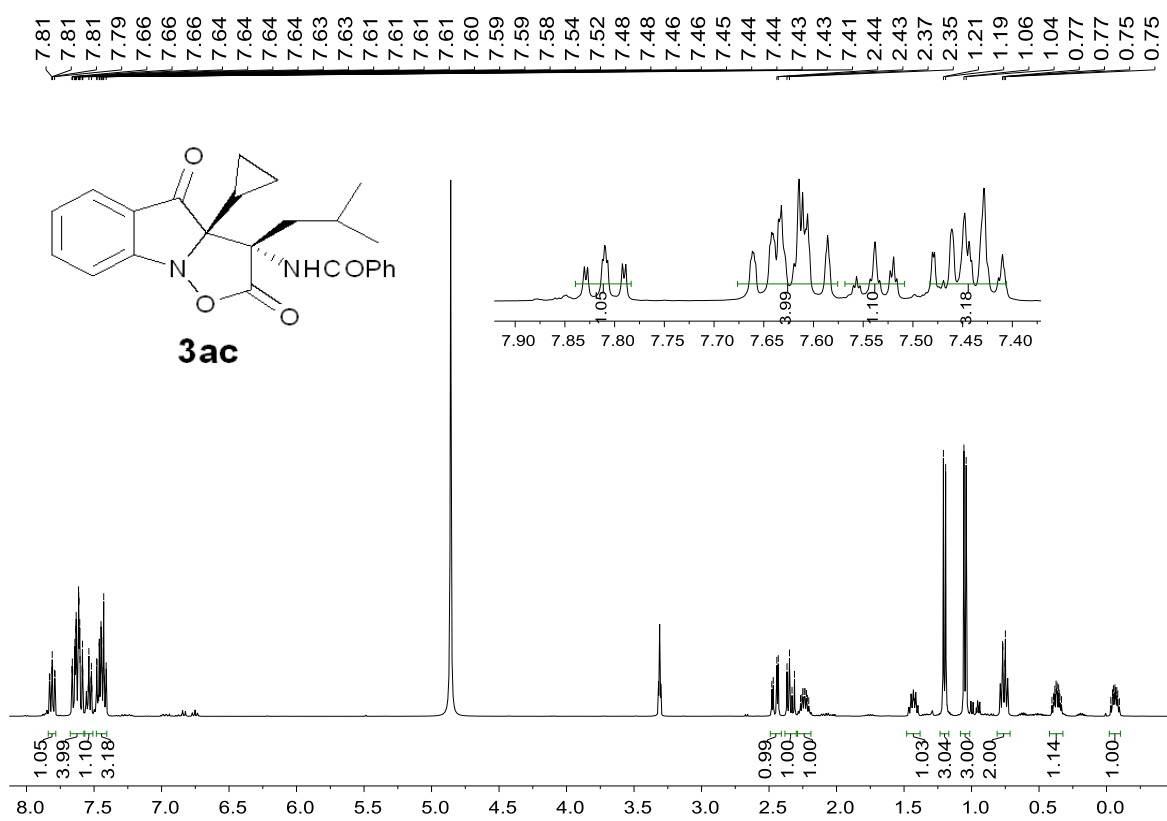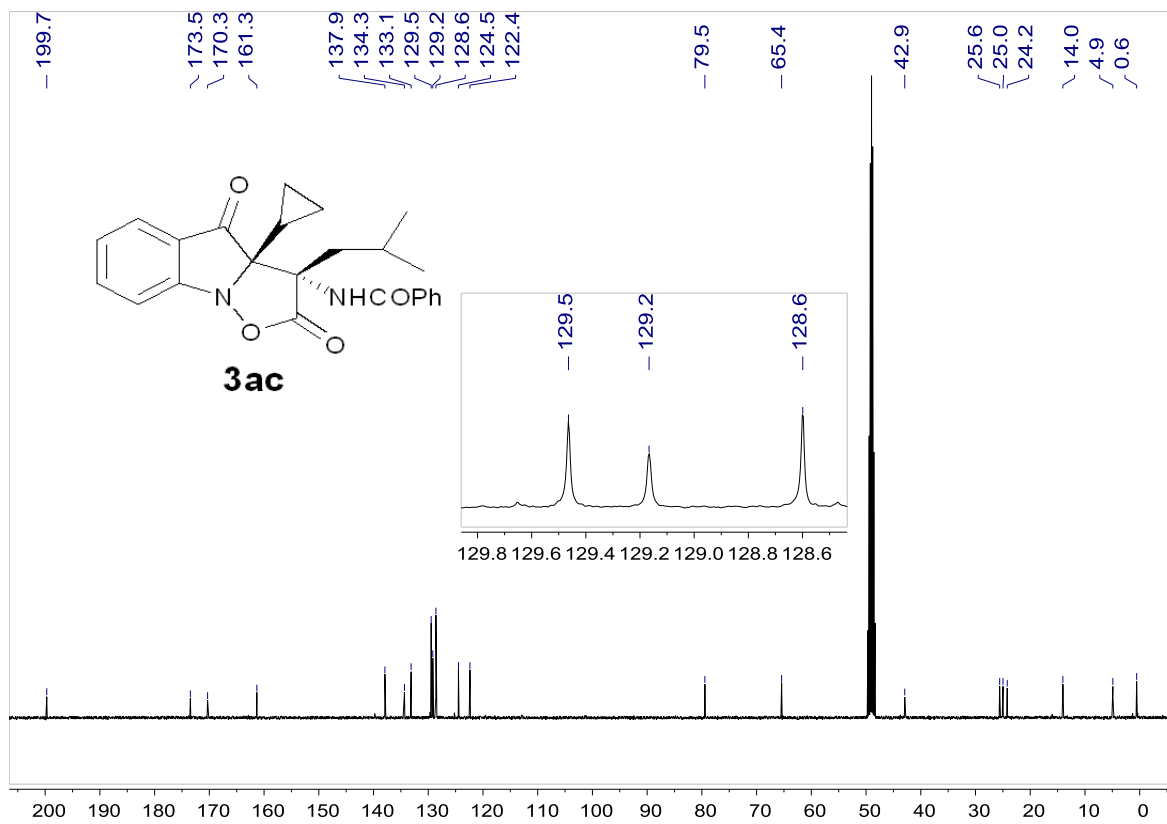

$^1\text{H}$  NMR (400 MHz) and  $^{13}\text{C}\{^1\text{H}\}$  NMR (101 MHz),  $\text{CDCl}_3$ , compound **3ad**

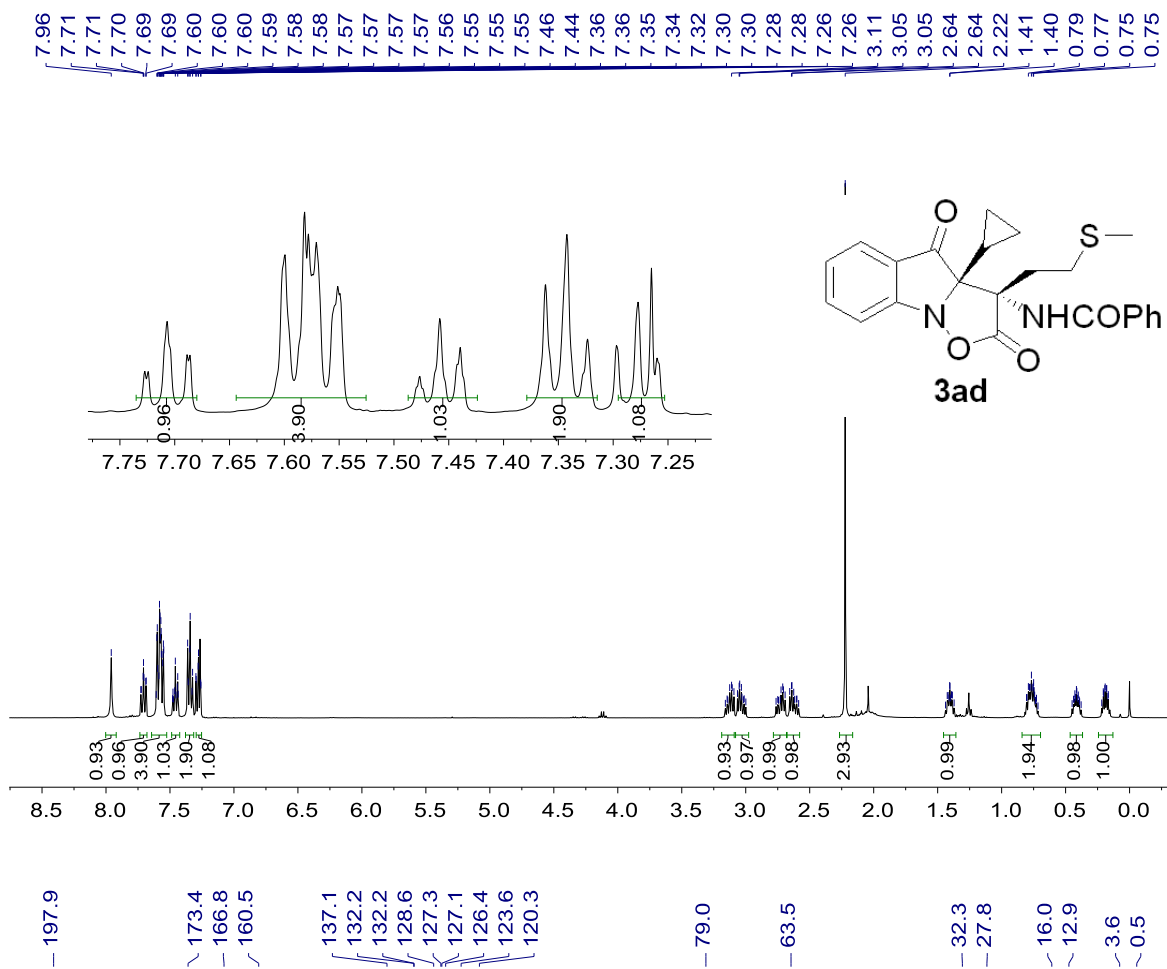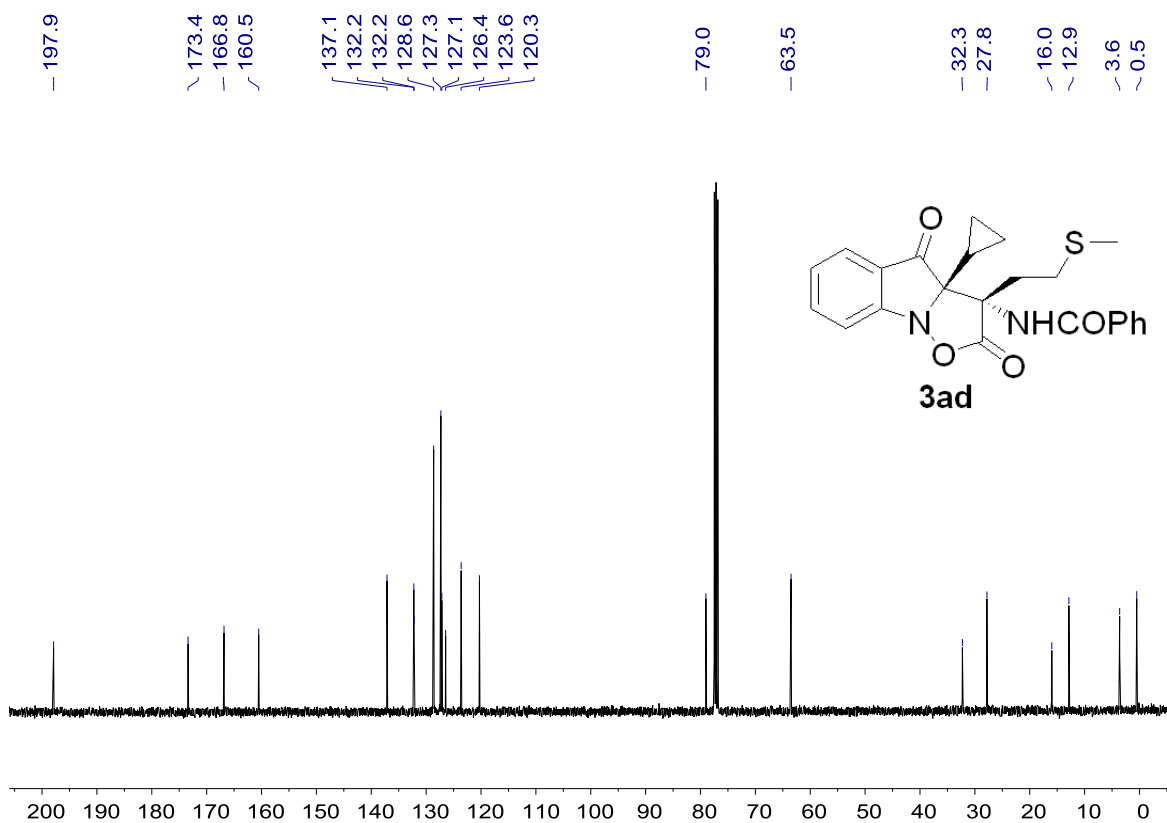

$^1\text{H}$  NMR (400 MHz) and  $^{13}\text{C}\{^1\text{H}\}$  NMR (101 MHz),  $(\text{CD}_3)_2\text{CO}$ , compound **3ae**

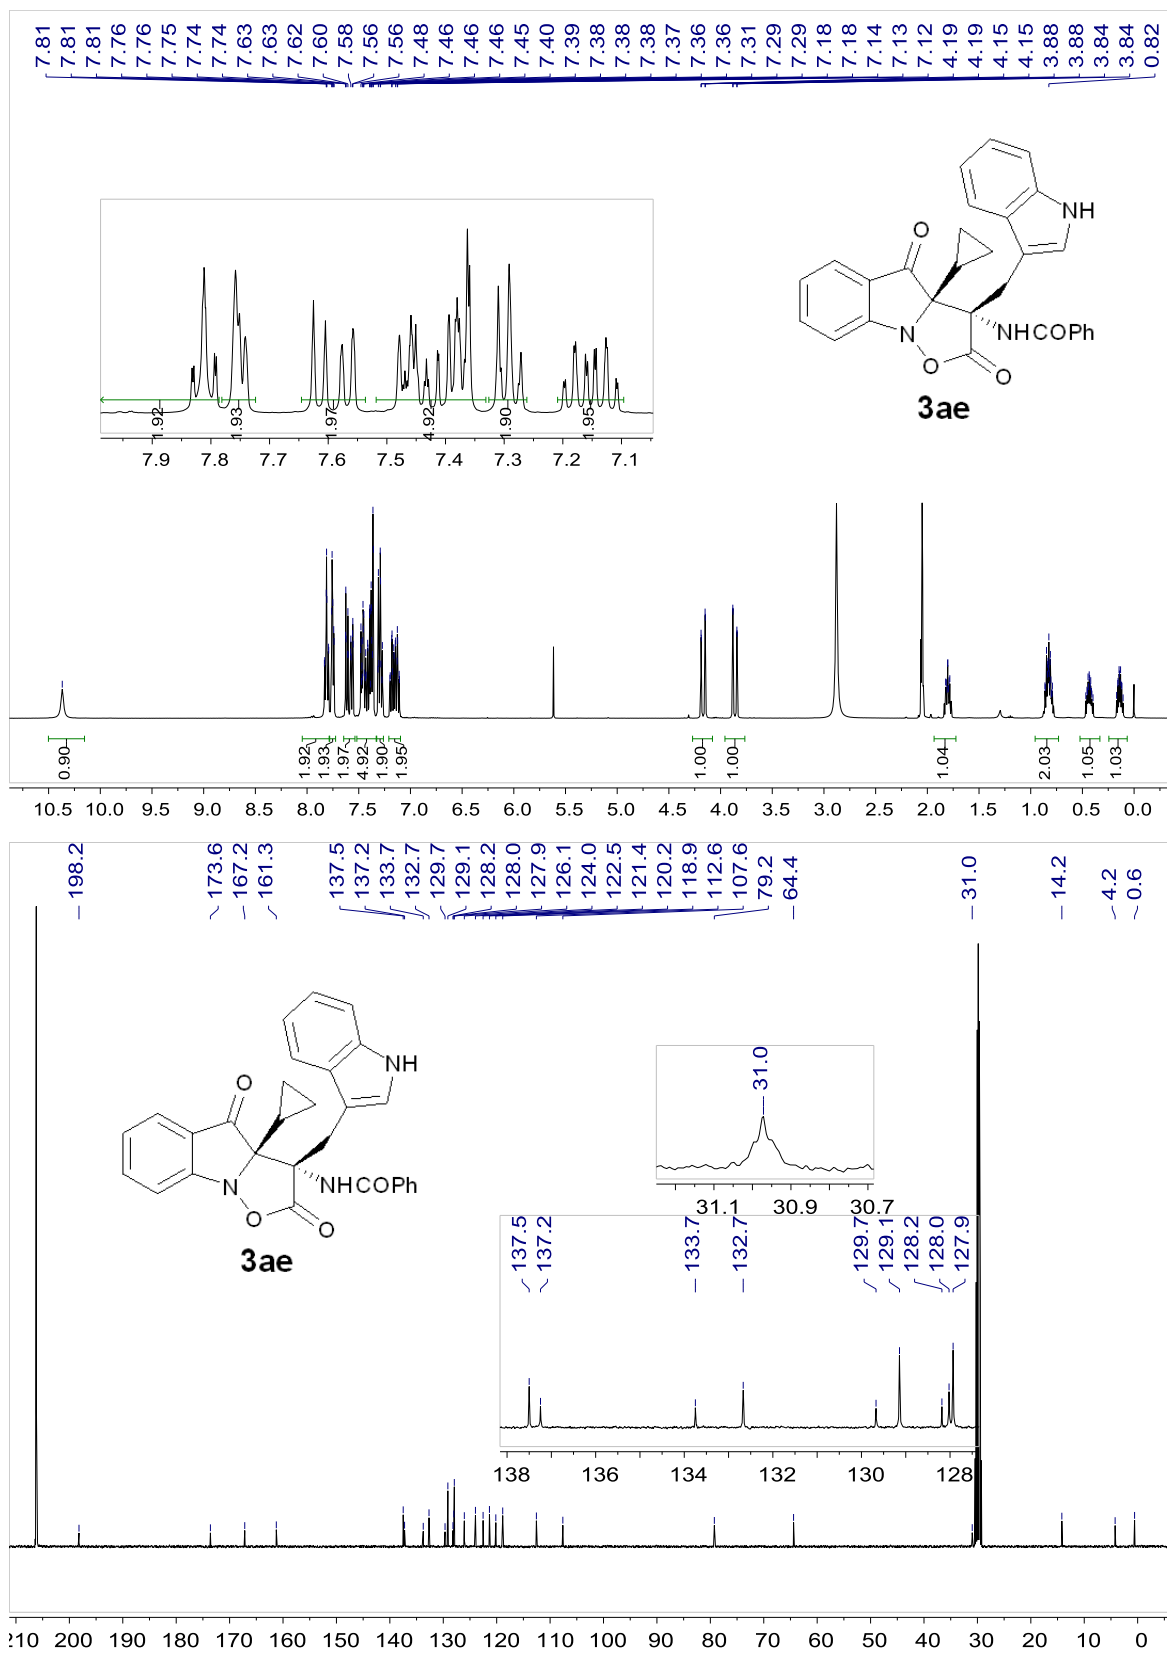



$^1\text{H}$  NMR (400 MHz) and  $^{13}\text{C}\{^1\text{H}\}$  NMR (101 MHz),  $\text{CDCl}_3$ , compound **3af**

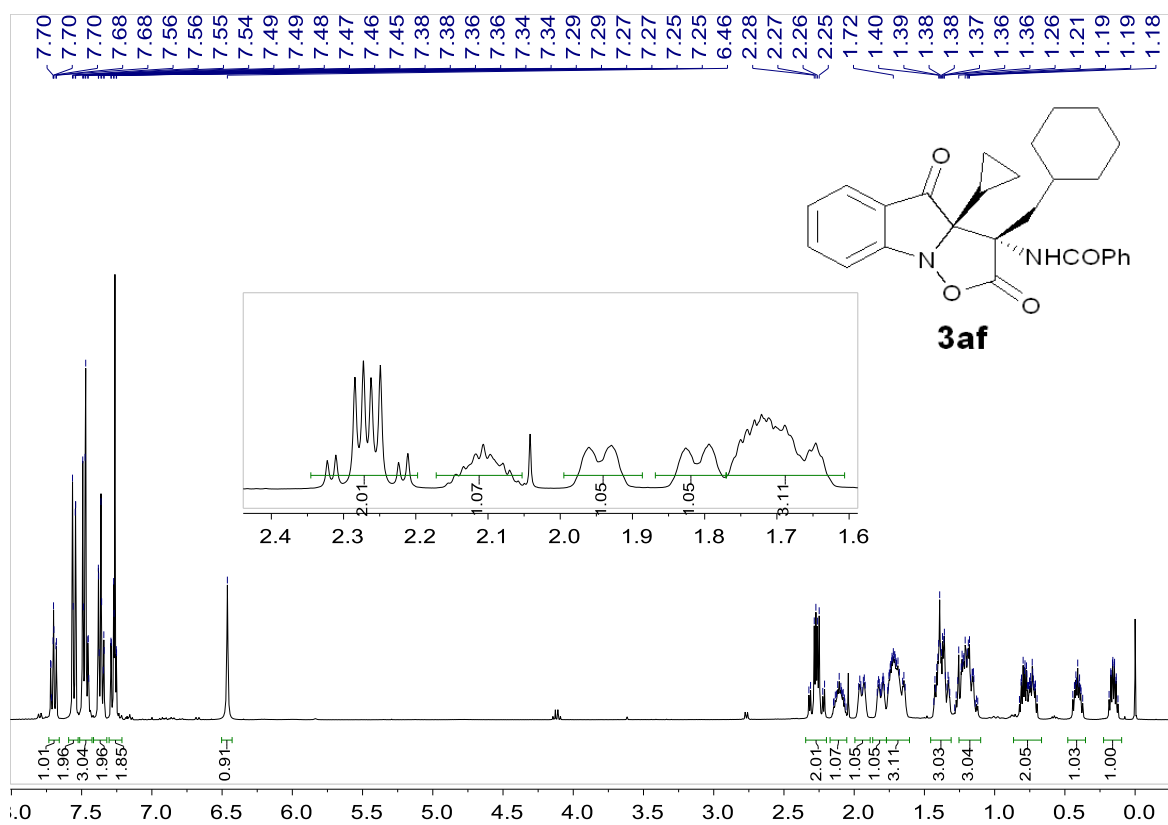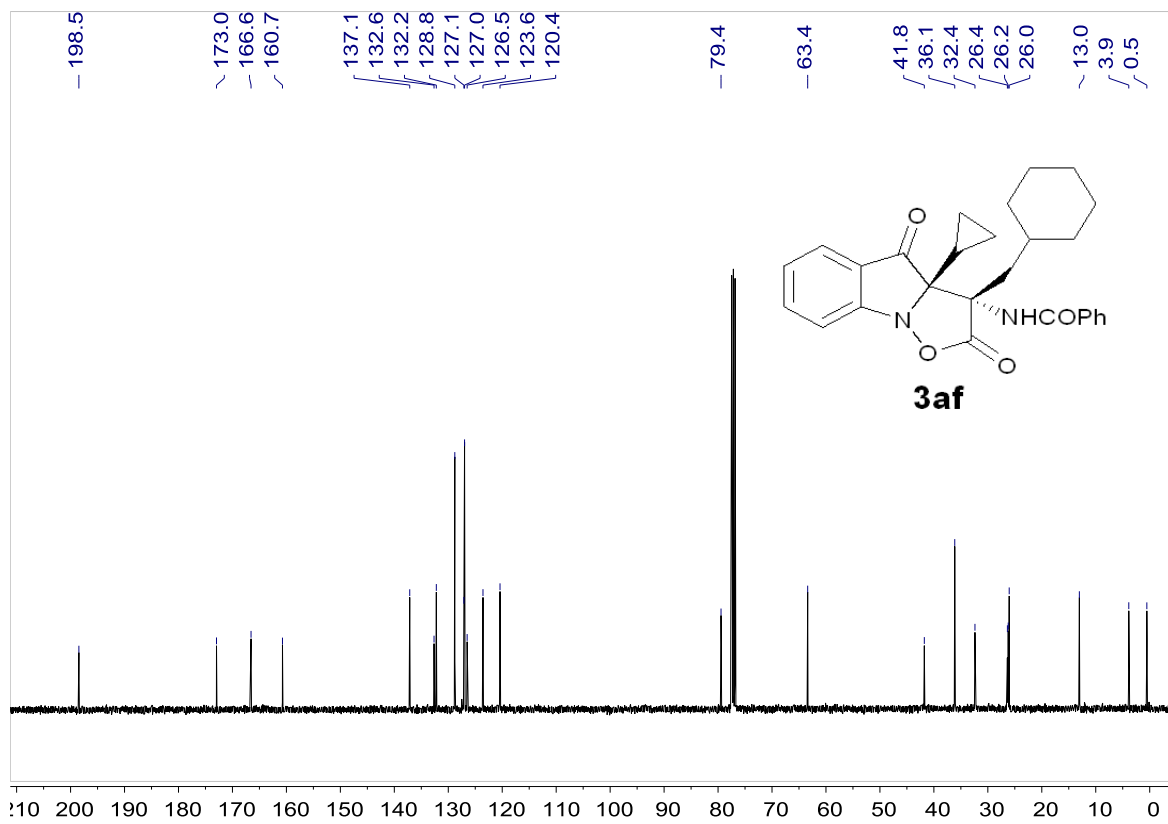

$^1\text{H}$  NMR (400 MHz) and  $^{13}\text{C}$ { $^1\text{H}$ } NMR (101 MHz),  $\text{CDCl}_3$ , compound **3ag**

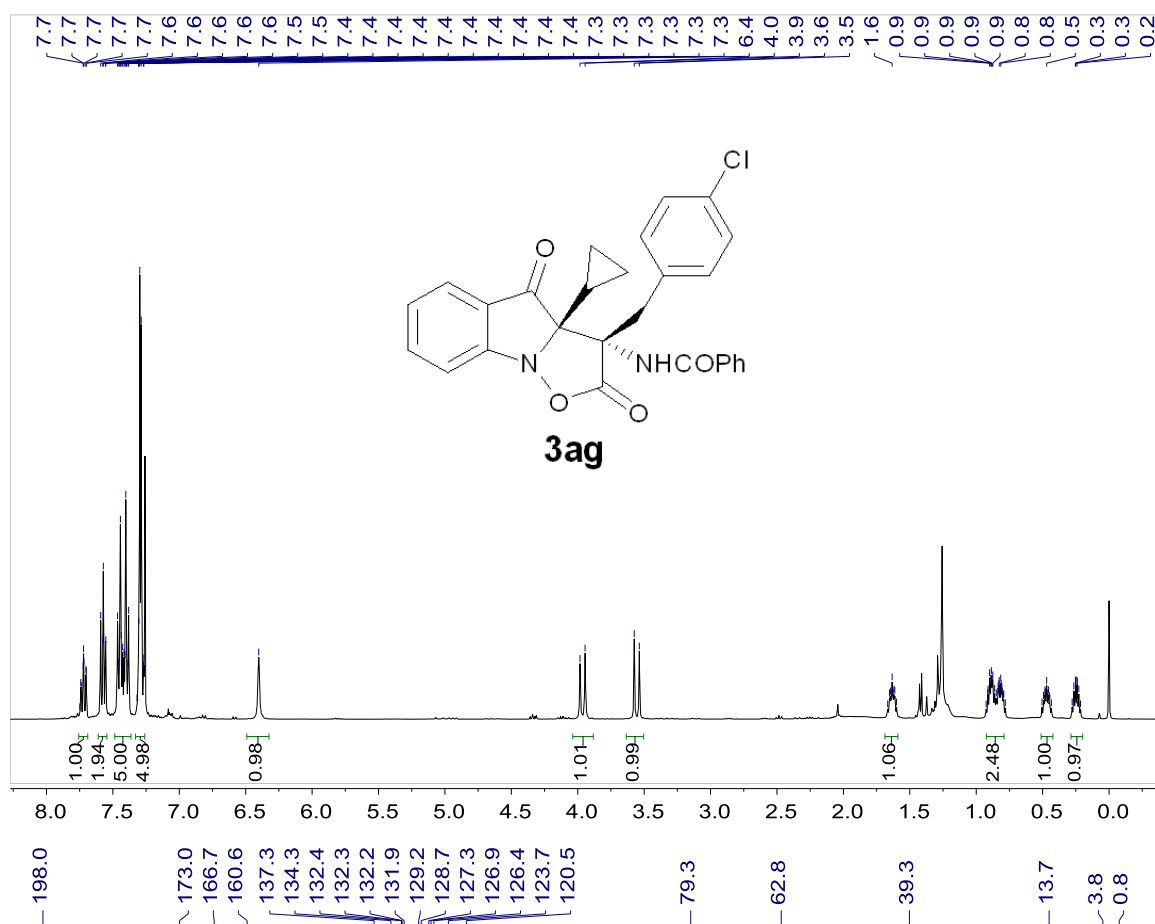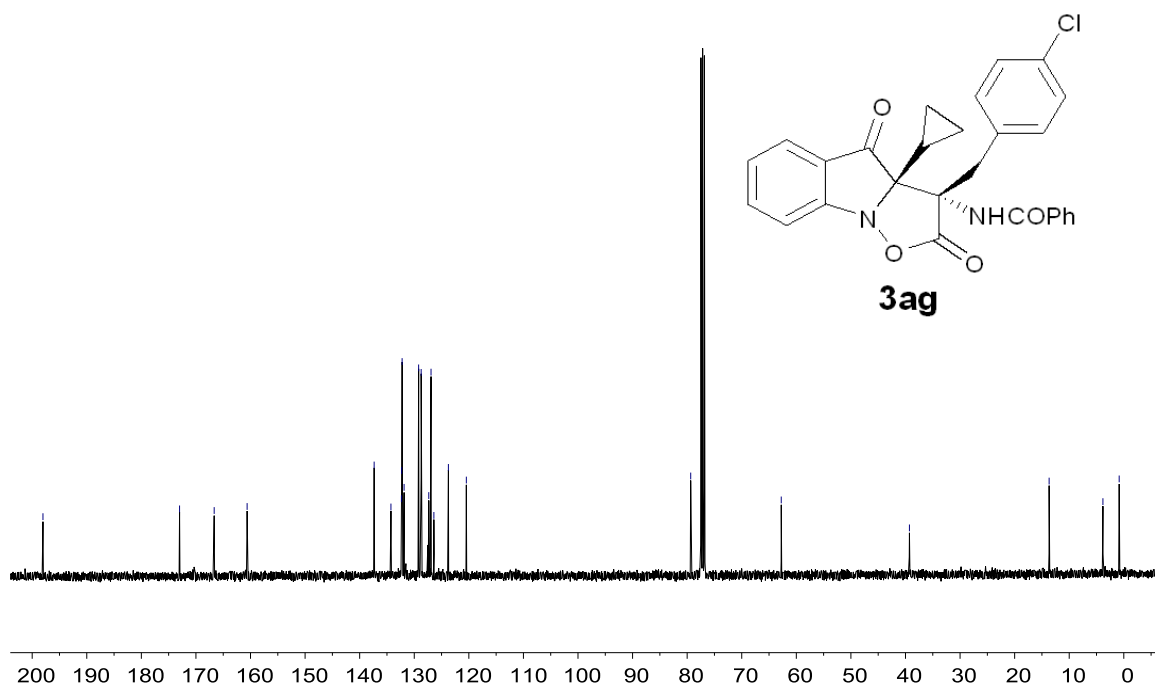

$^1\text{H}$  NMR (400 MHz) and  $^{13}\text{C}\{^1\text{H}\}$  NMR (101 MHz),  $\text{CDCl}_3$ , compound **3ah**

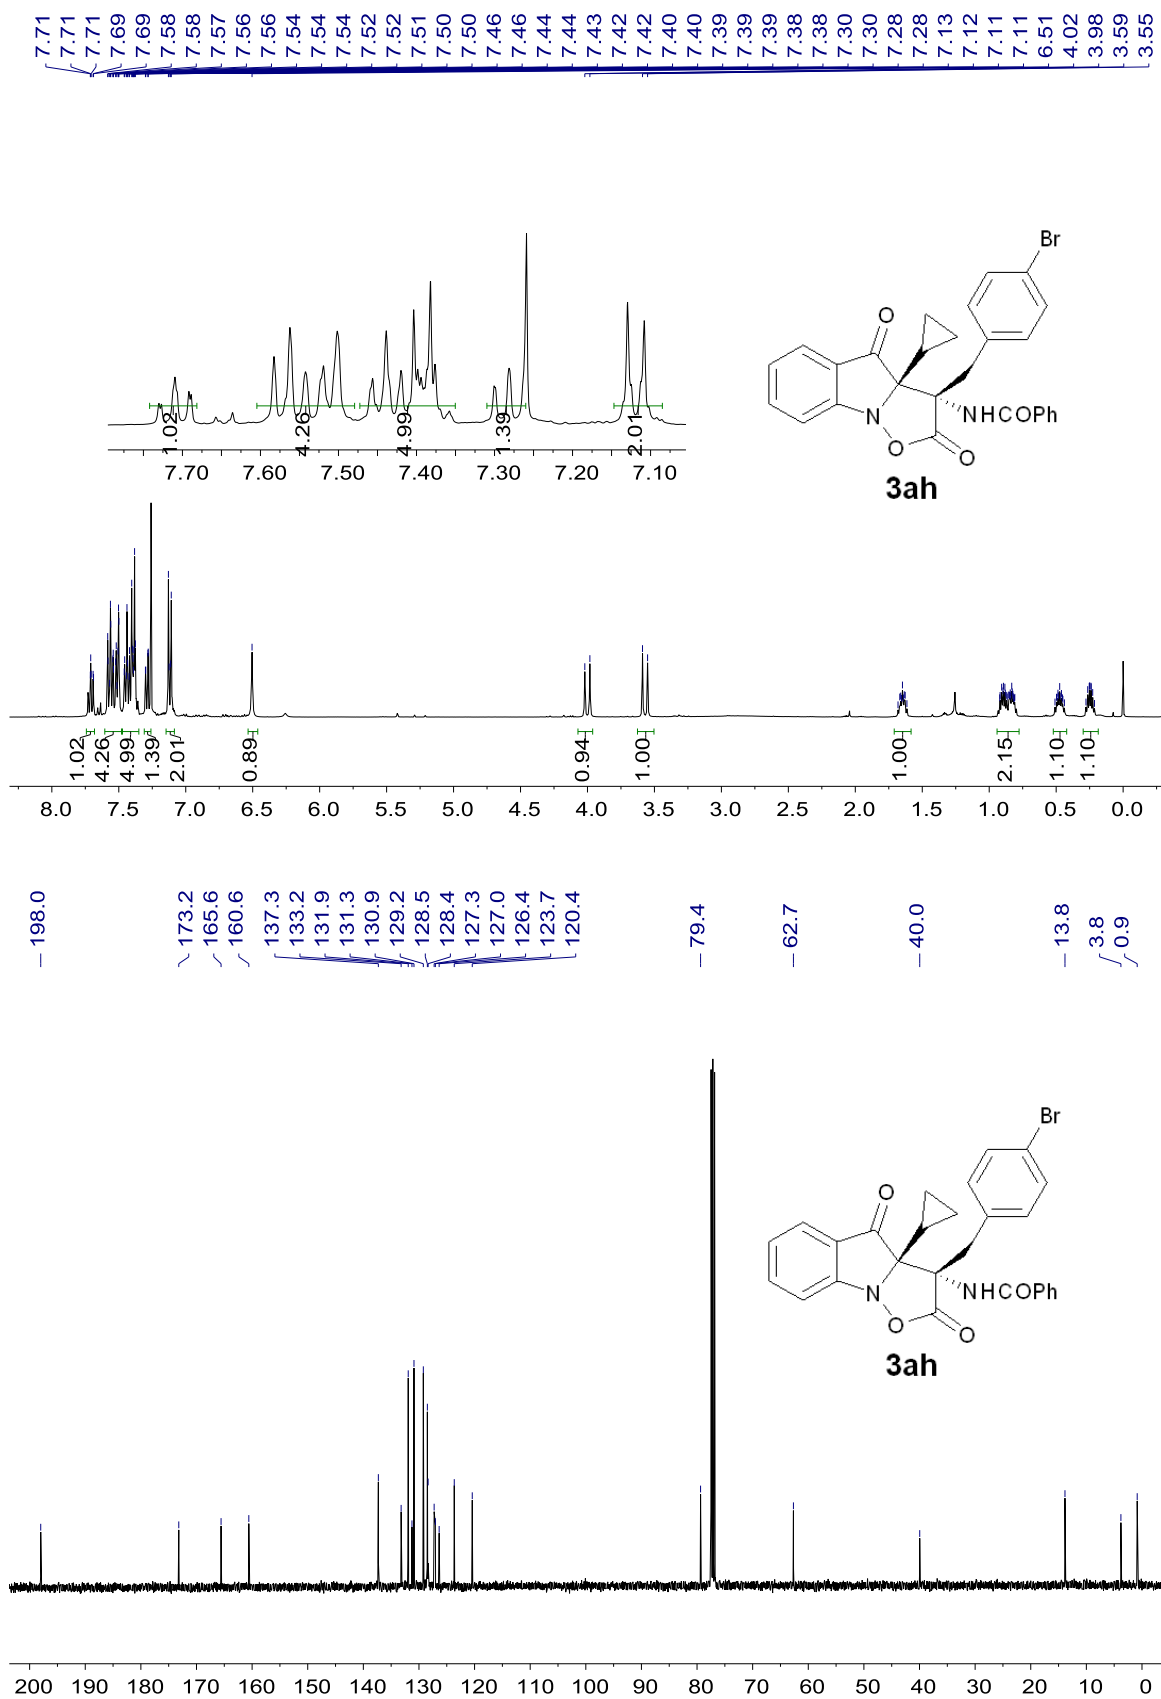

$^1\text{H}$  NMR (400 MHz) and  $^{13}\text{C}\{^1\text{H}\}$  NMR (101 MHz),  $\text{CDCl}_3$ , compound **3ai**

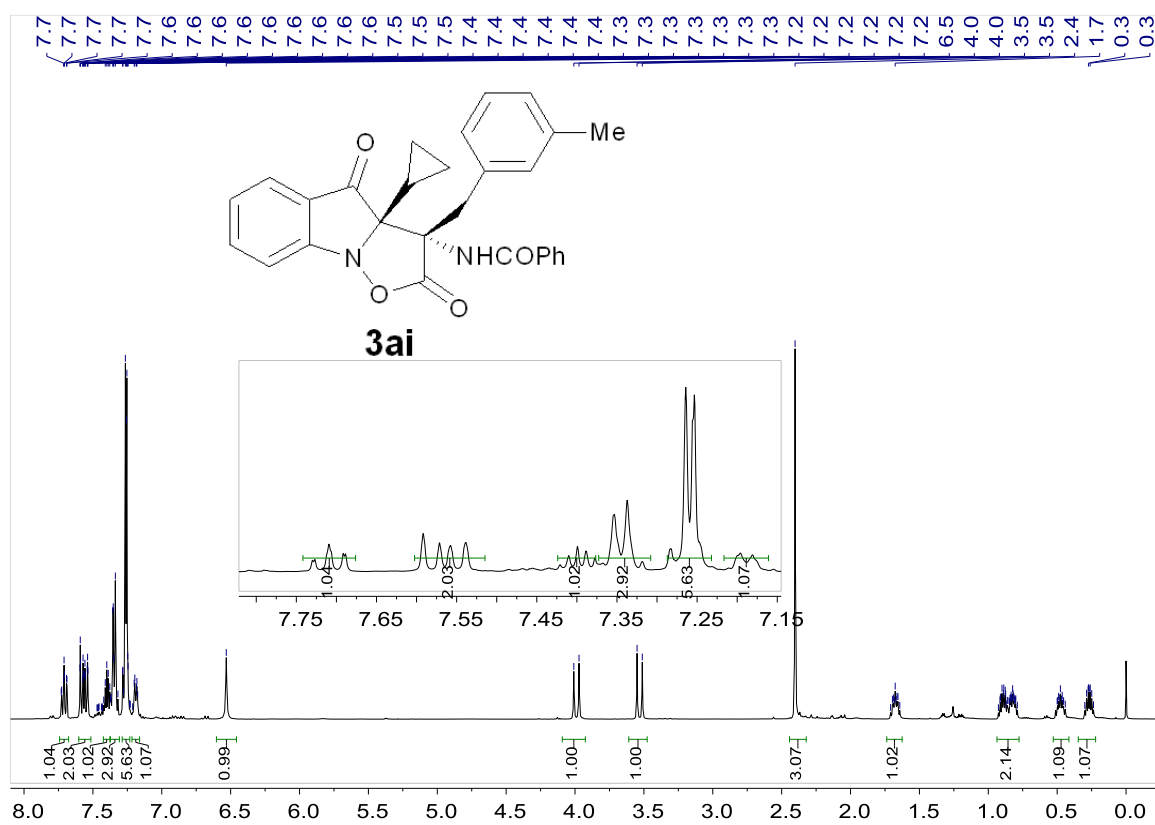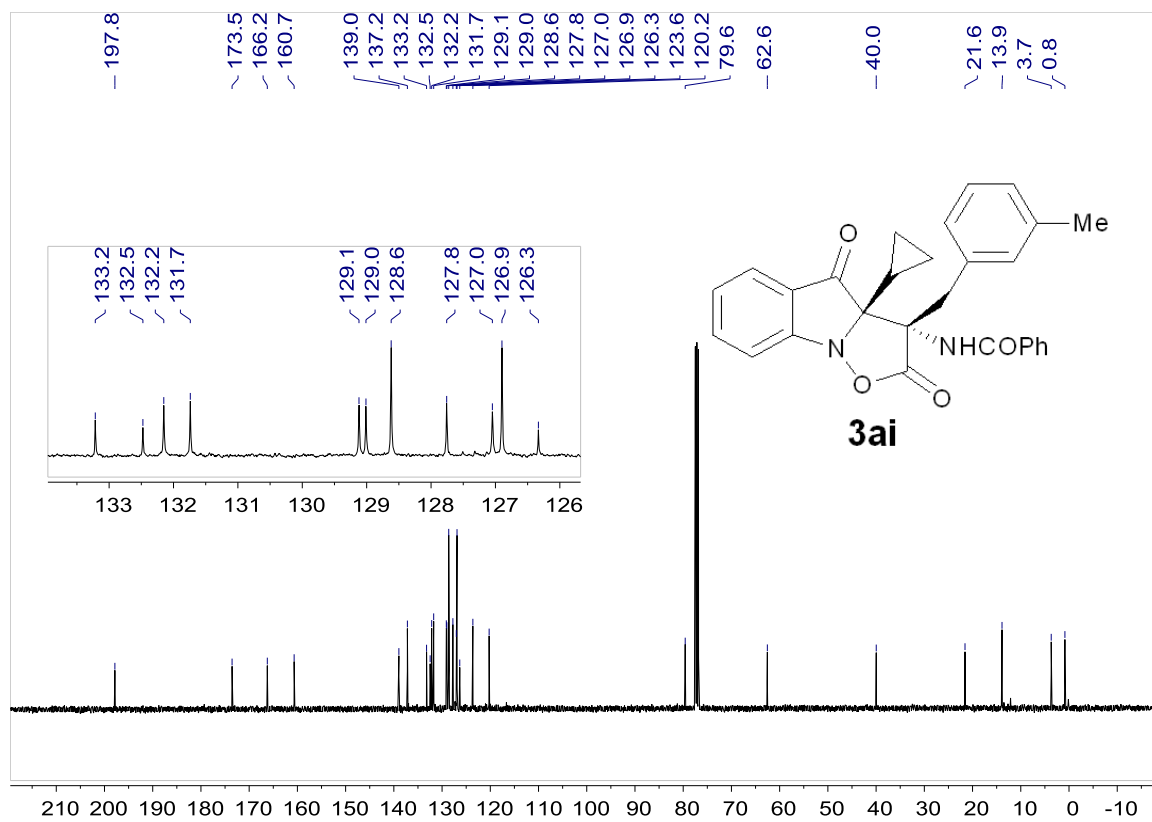

$^1\text{H}$  NMR (400 MHz) and  $^{13}\text{C}\{^1\text{H}\}$  NMR (101 MHz),  $\text{CDCl}_3$ , compound **3aj**

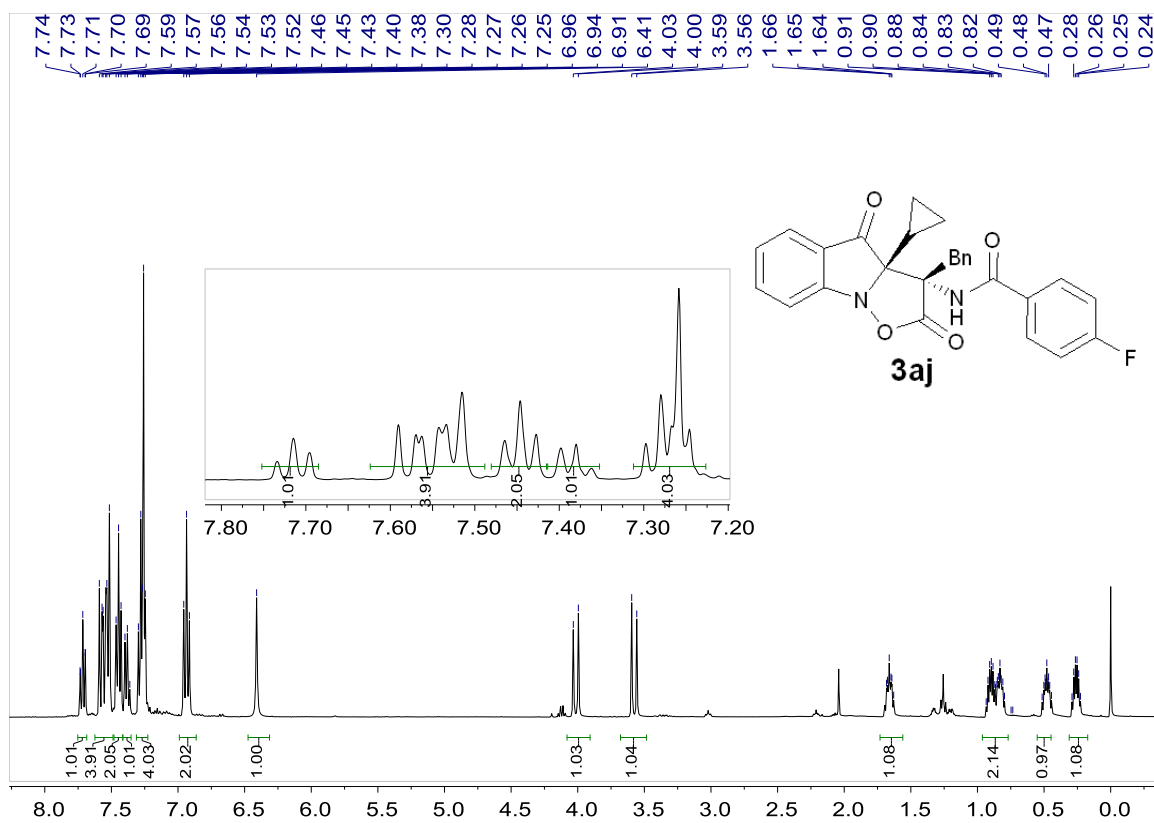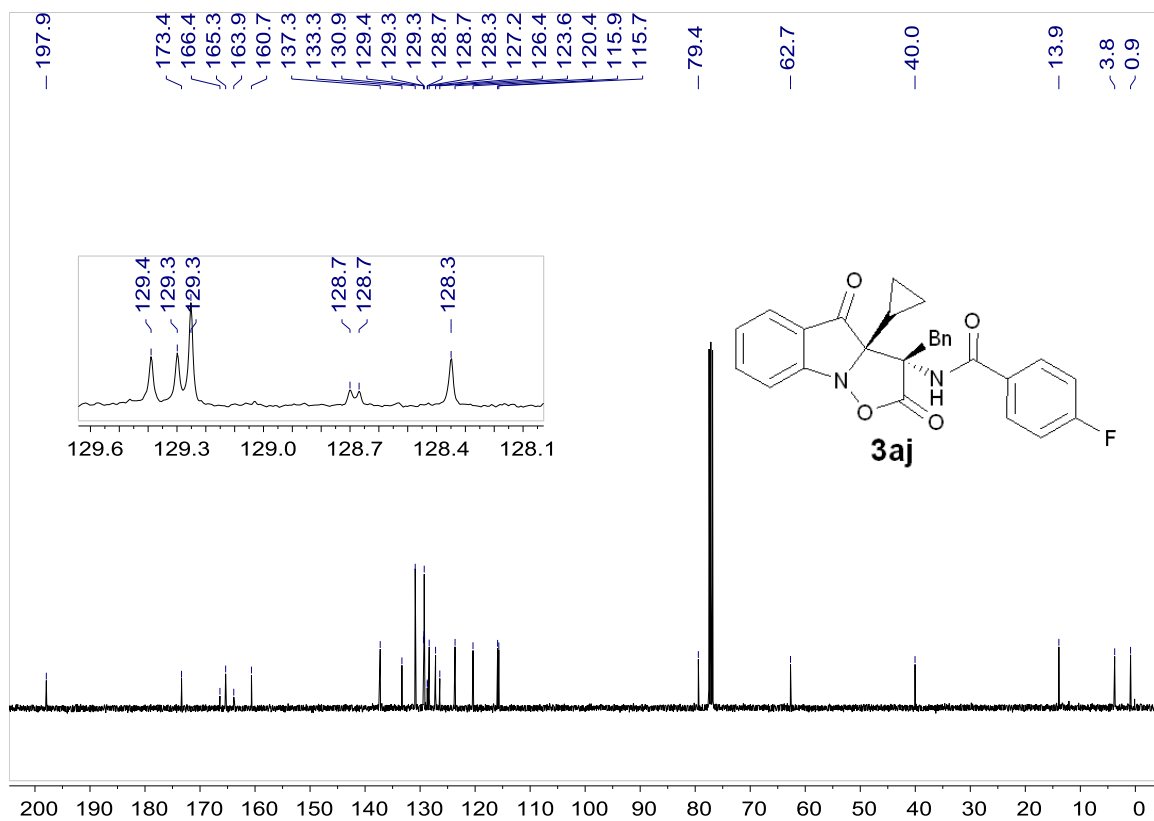

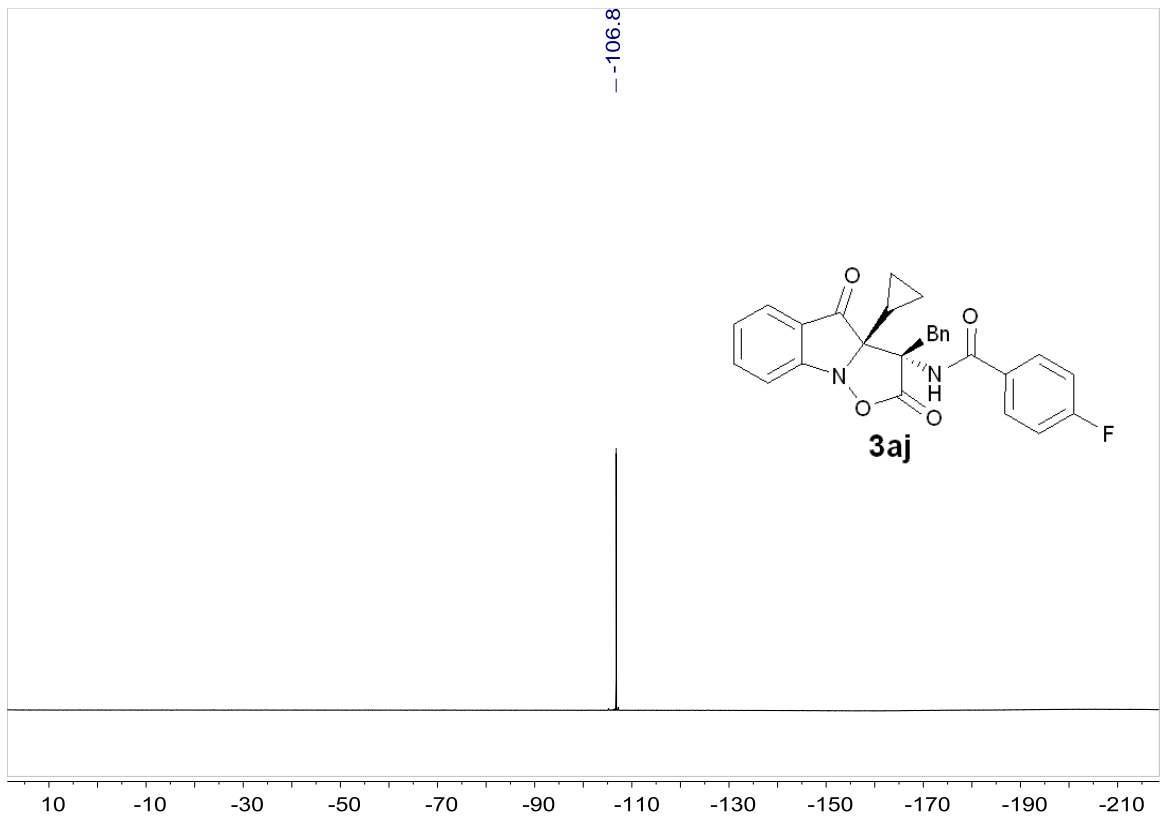

$^1\text{H}$  NMR (400 MHz) and  $^{13}\text{C}\{^1\text{H}\}$  NMR (101 MHz),  $\text{CDCl}_3$ , compound **3ak**

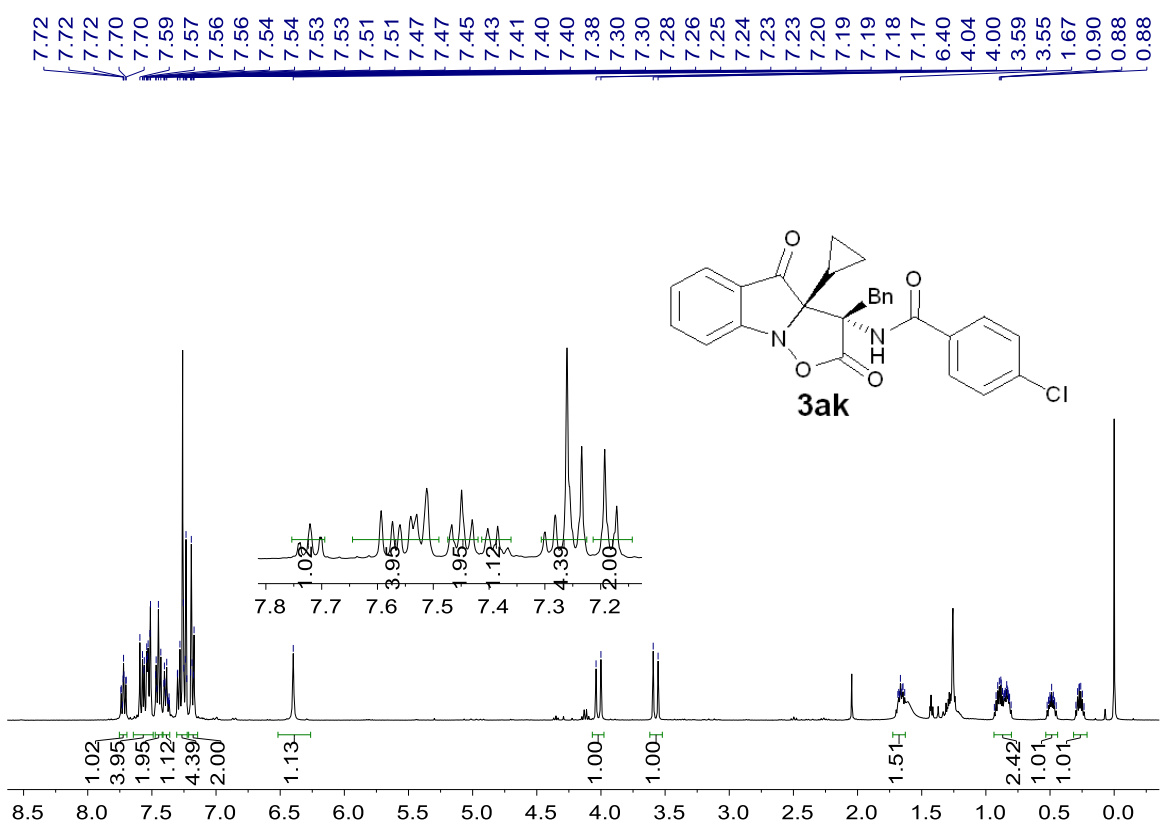

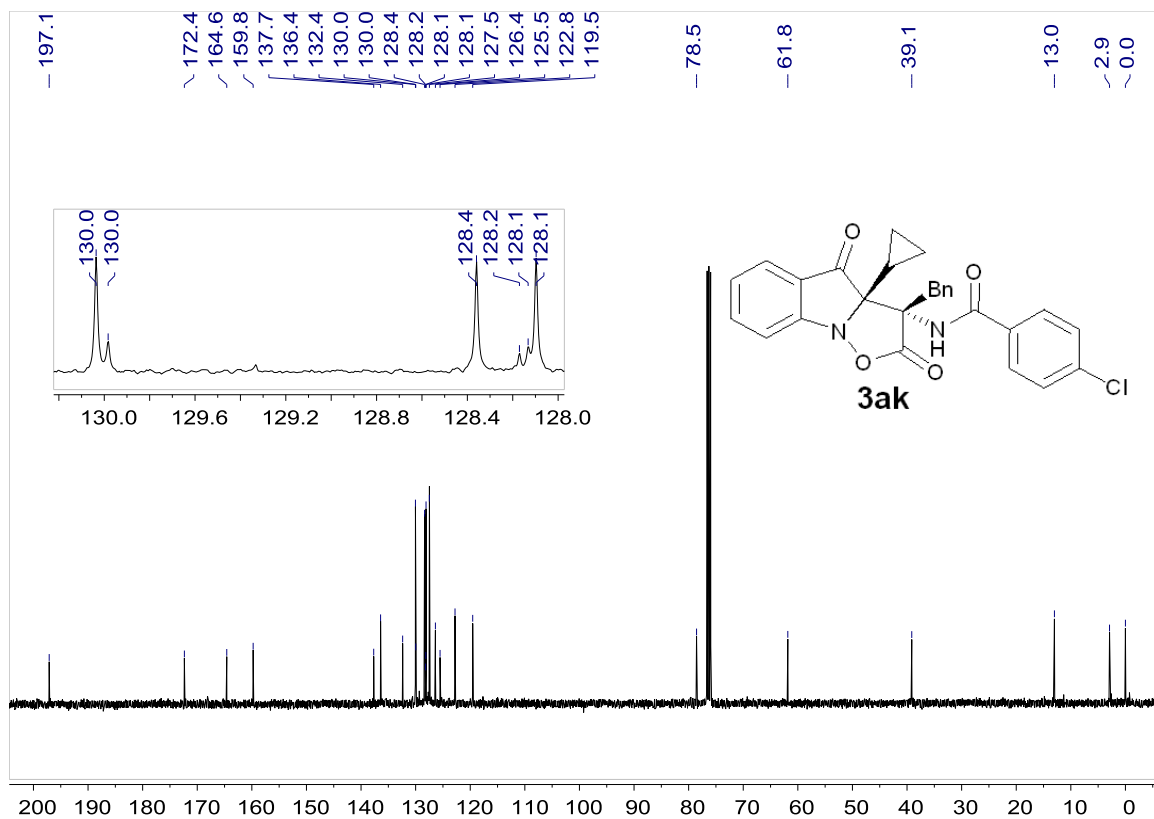

$^1\text{H}$  NMR (400 MHz) and  $^{13}\text{C}\{^1\text{H}\}$  NMR (101 MHz),  $\text{CDCl}_3$ , compound **3al**

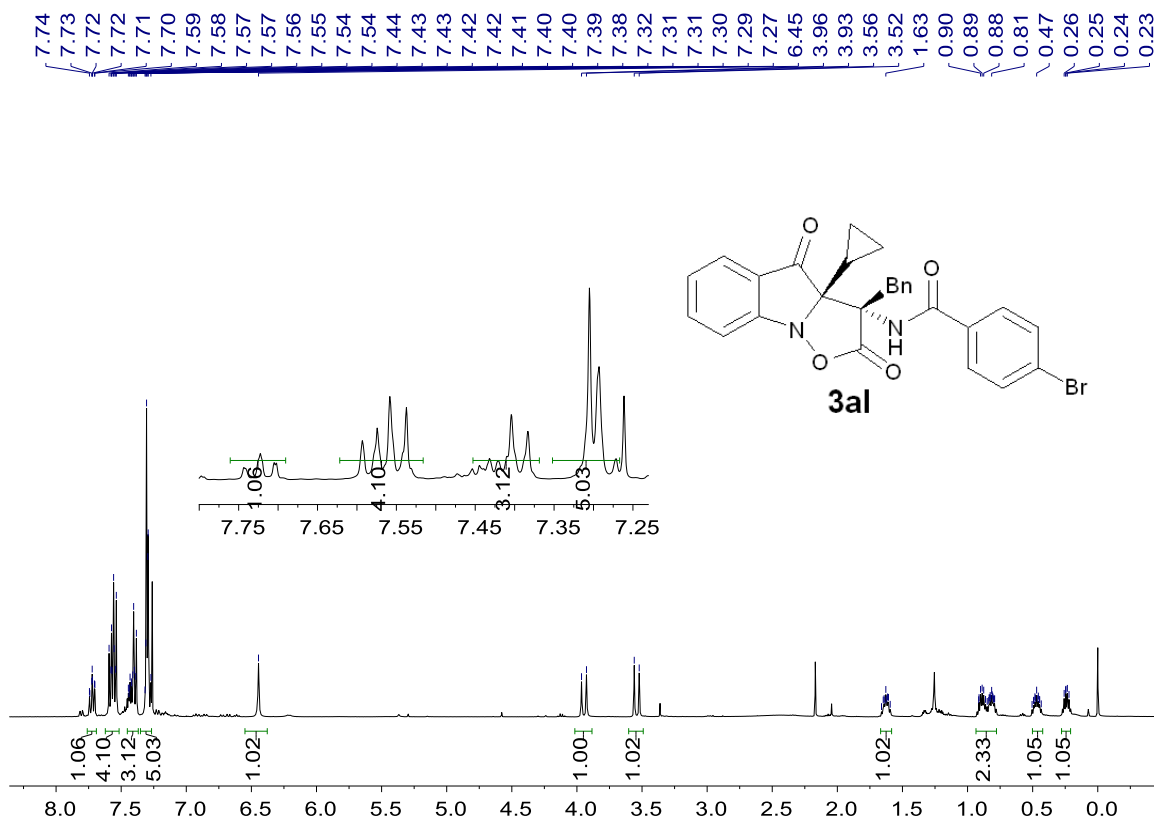

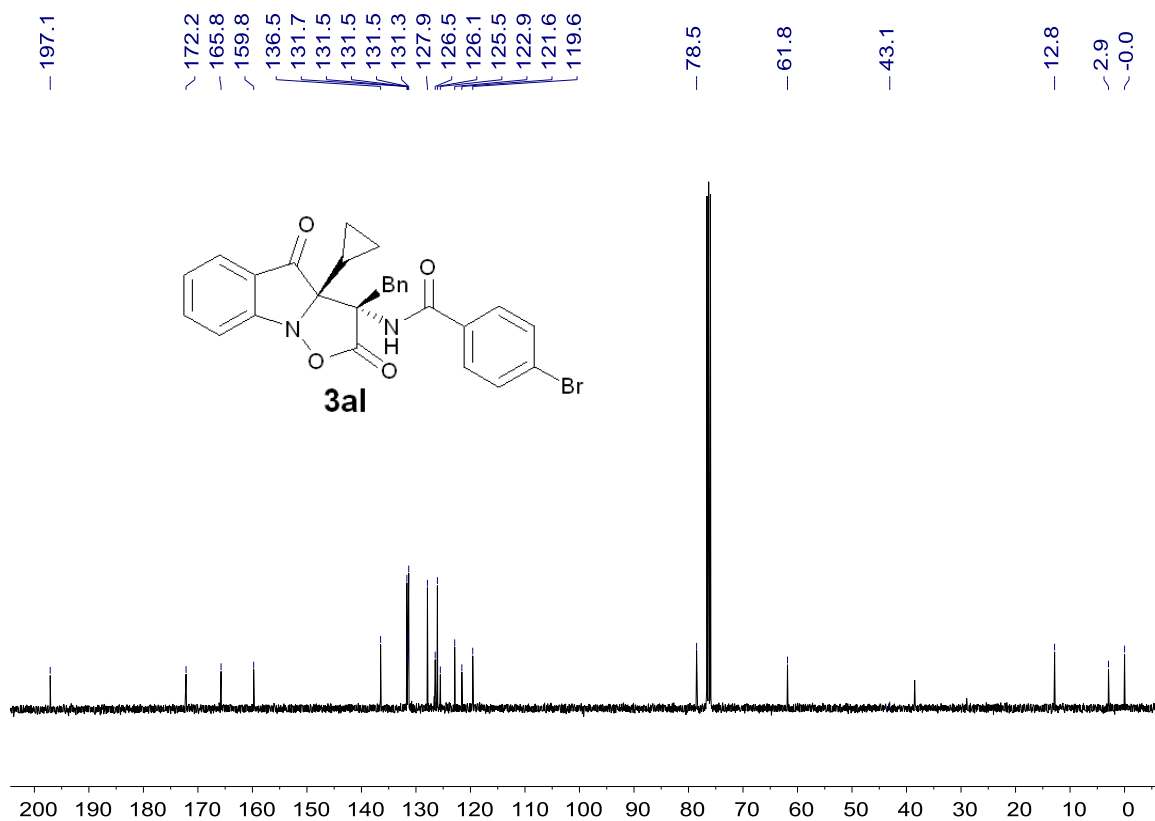

**<sup>1</sup>H NMR (400 MHz) and <sup>13</sup>C{<sup>1</sup>H} NMR (101 MHz), CDCl<sub>3</sub>, compound 3am**

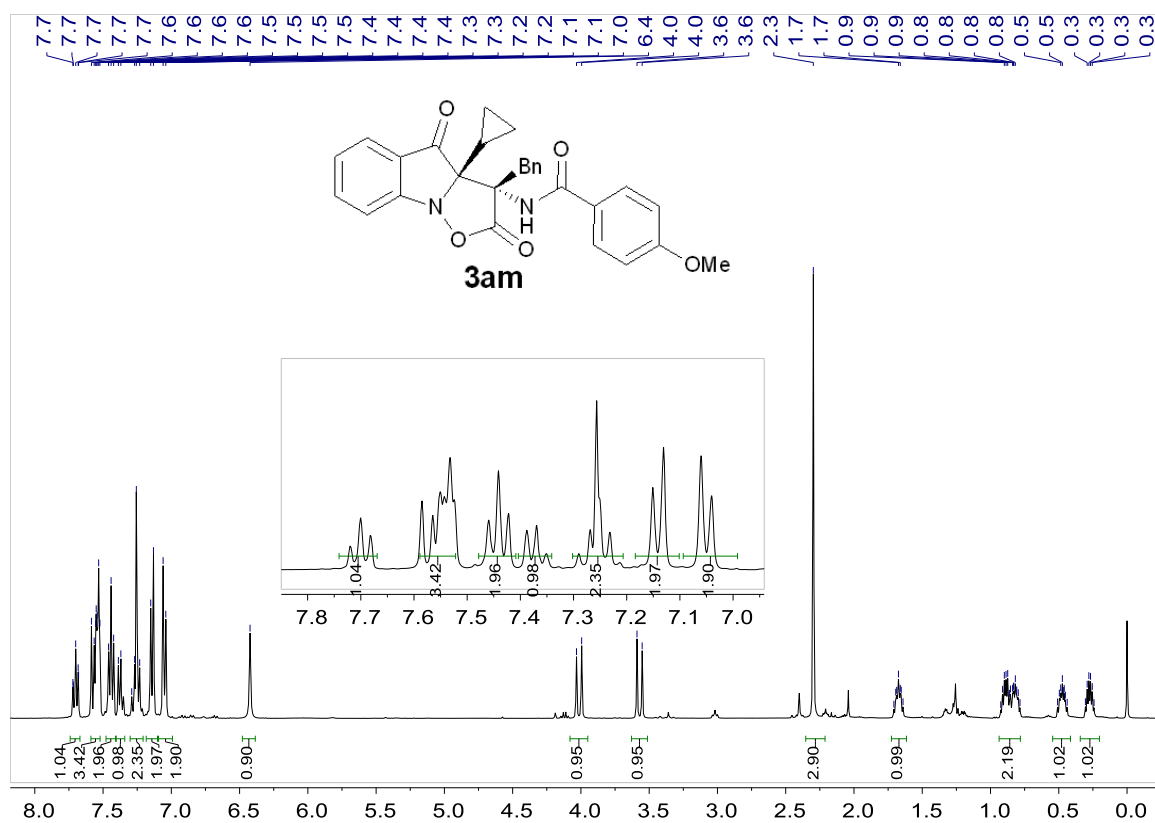



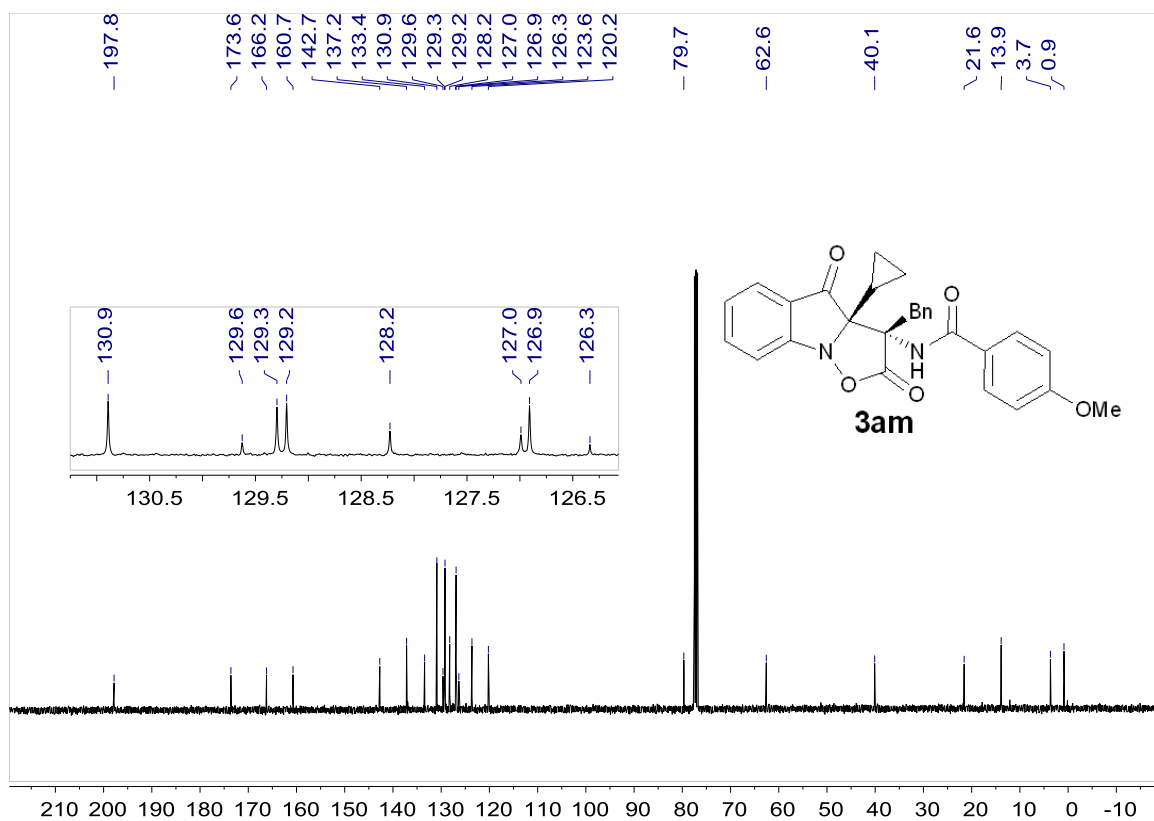

**<sup>1</sup>H NMR (400 MHz) and <sup>13</sup>C{<sup>1</sup>H} NMR (101 MHz), CDCl<sub>3</sub>, compound 3an**

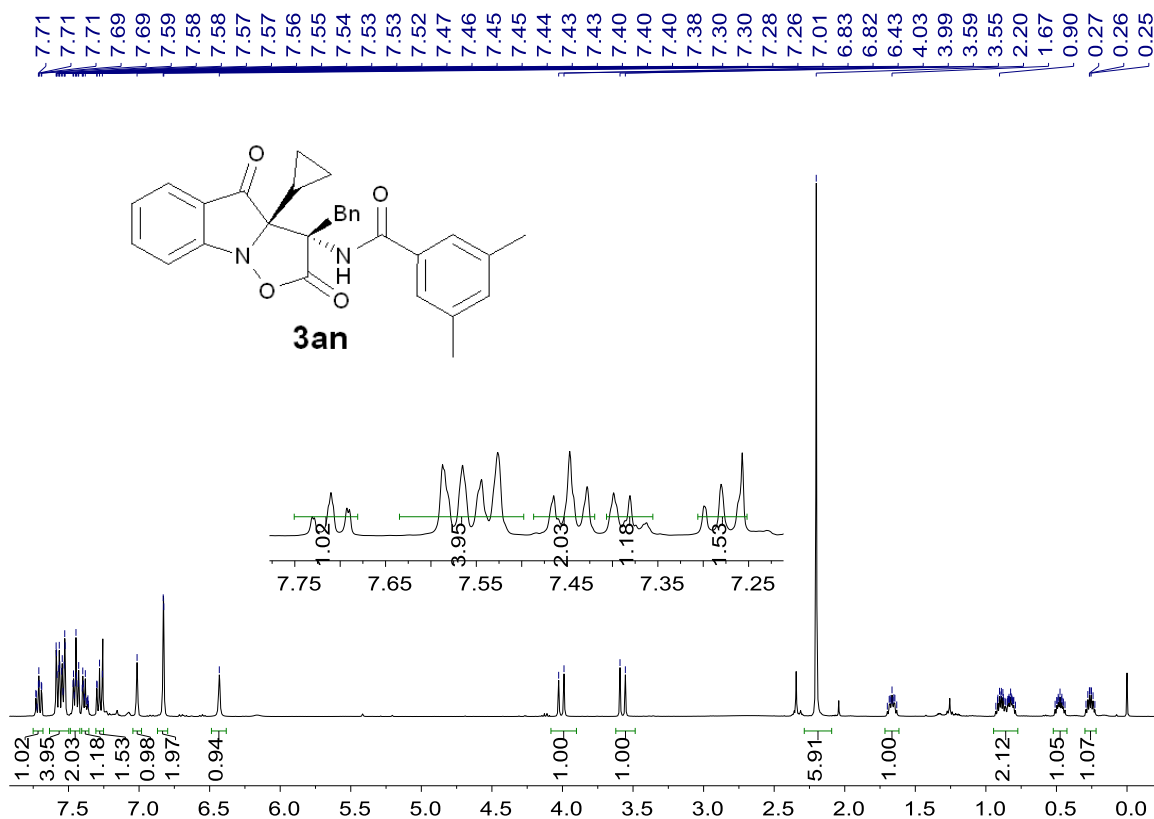

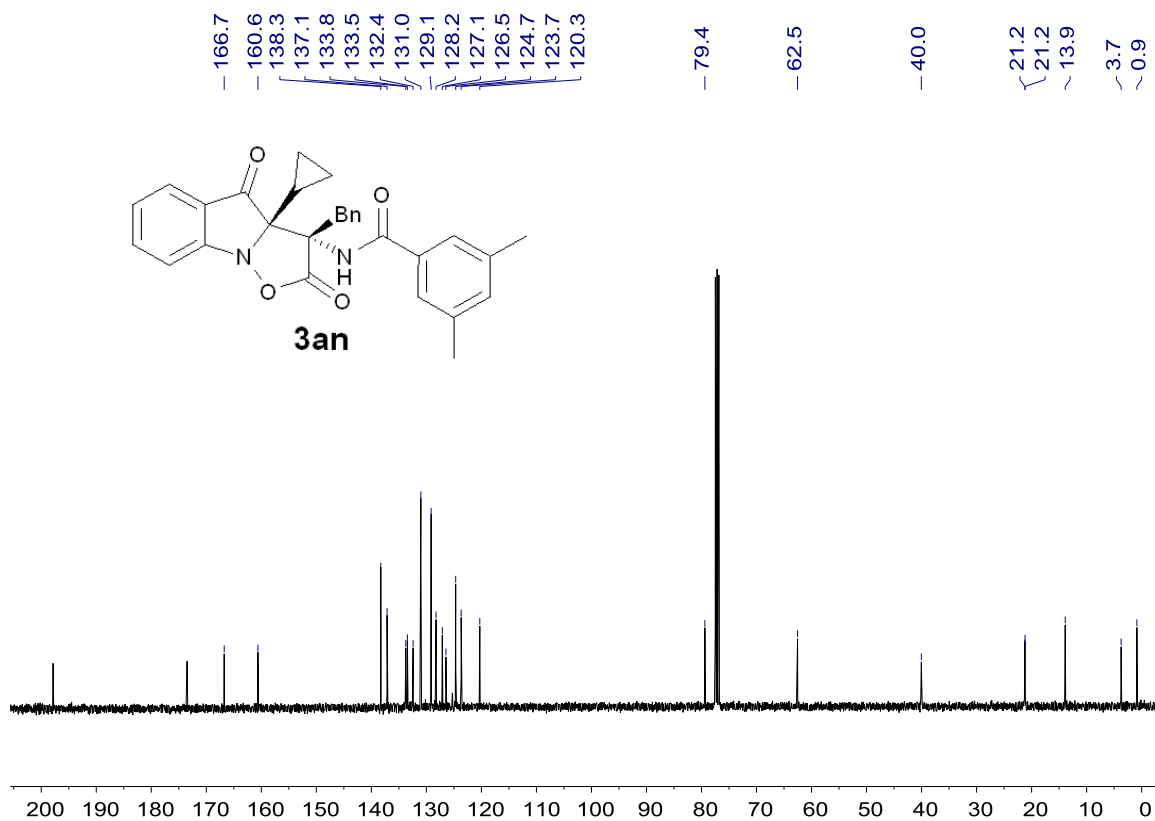

$^1\text{H}$  NMR (400 MHz) and  $^{13}\text{C}\{^1\text{H}\}$  NMR (101 MHz),  $\text{CDCl}_3$ , compound **3ao**

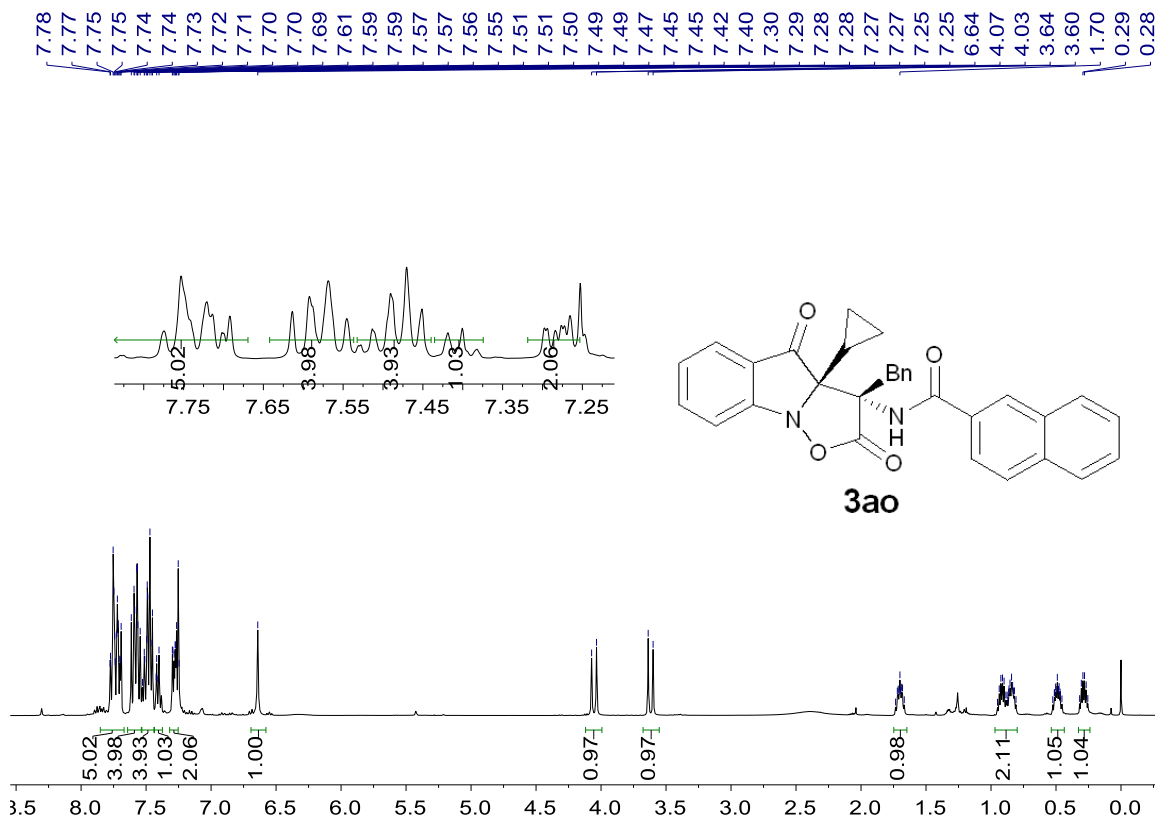

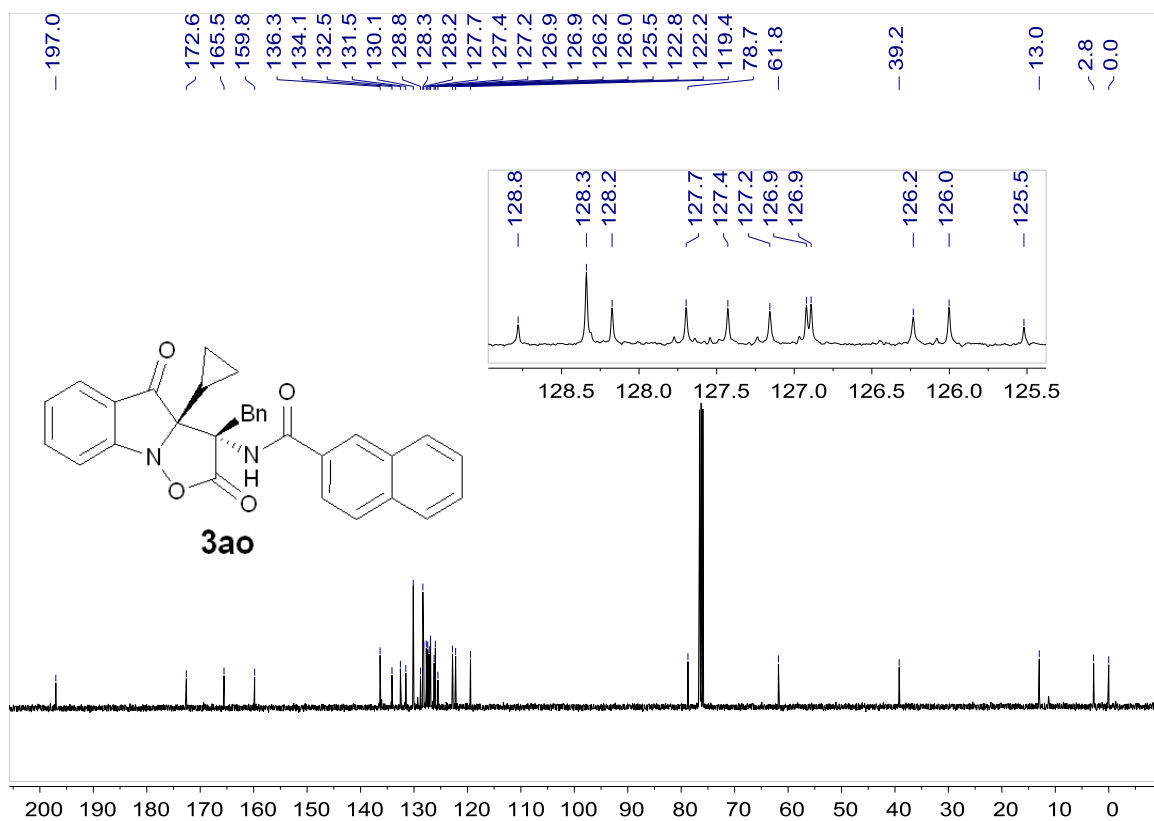

<sup>1</sup>H NMR (400 MHz) and <sup>13</sup>C{<sup>1</sup>H} NMR (101 MHz), CDCl<sub>3</sub>, compound **3ba**

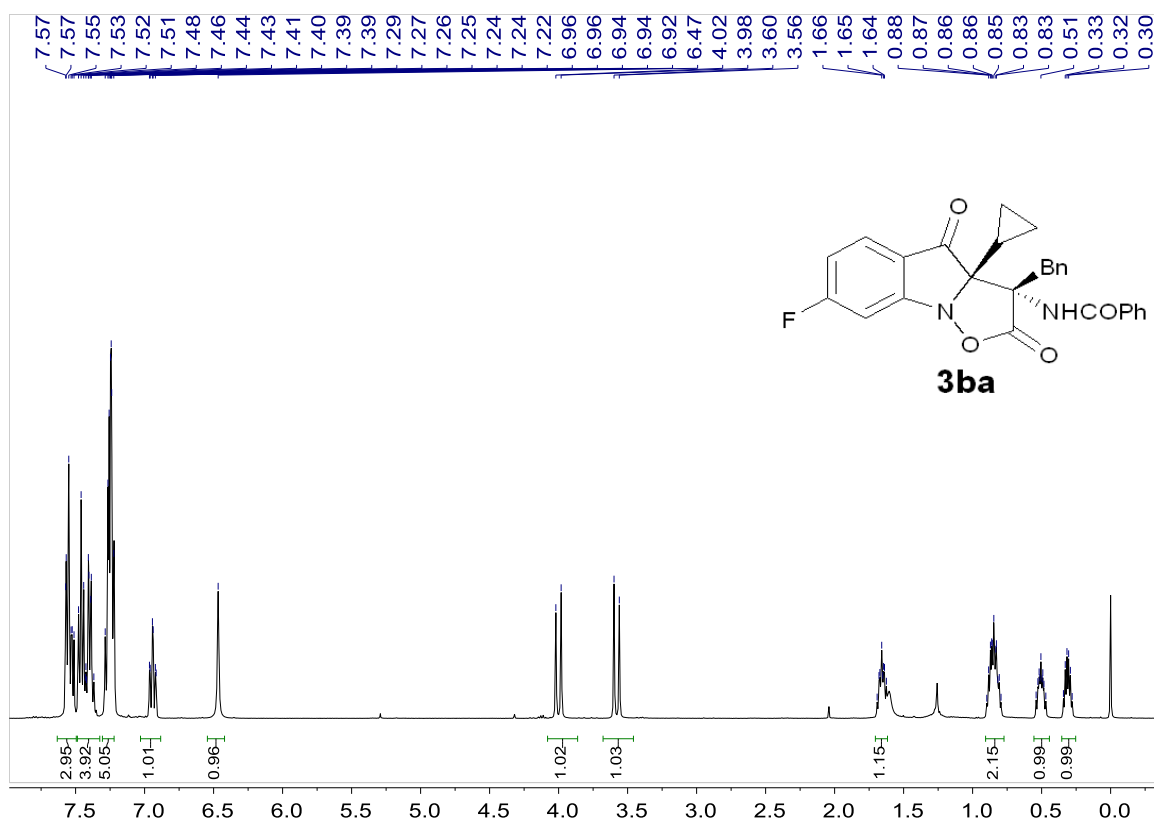

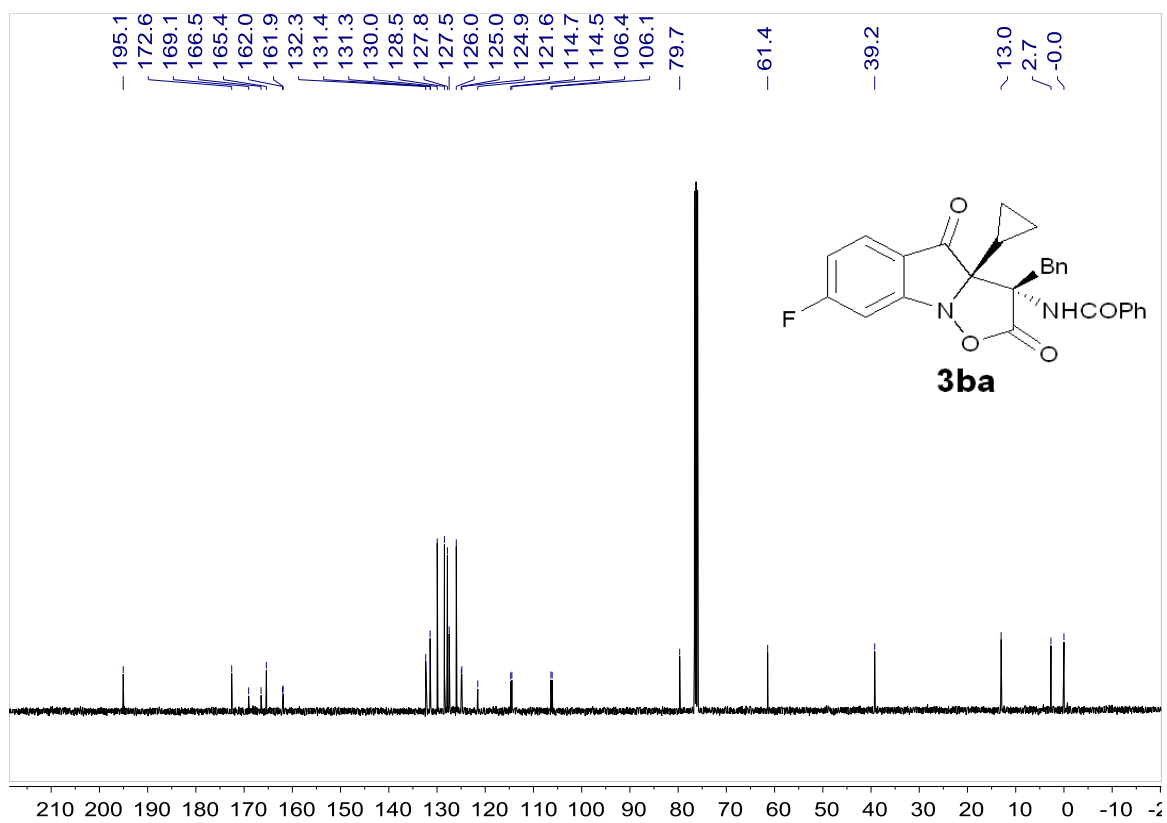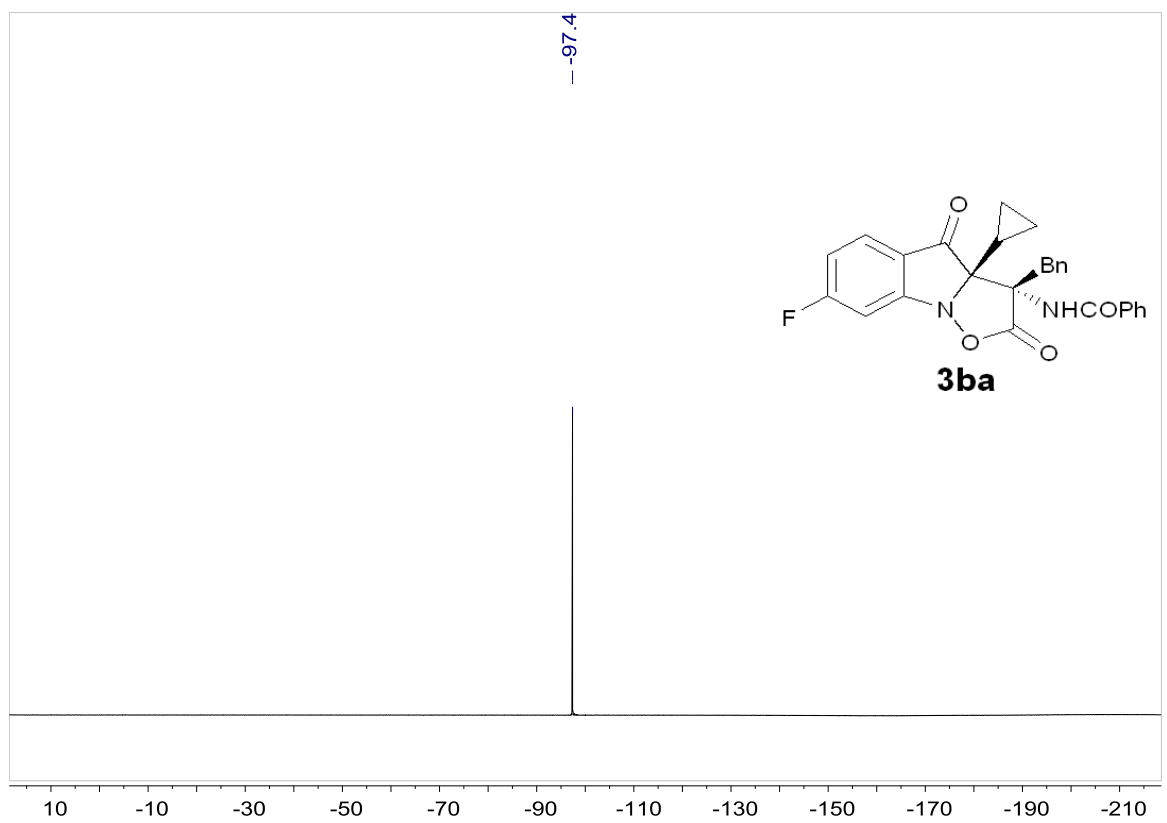

$^1\text{H}$  NMR (400 MHz) and  $^{13}\text{C}\{^1\text{H}\}$  NMR (101 MHz),  $\text{CDCl}_3$ , compound **3ca**

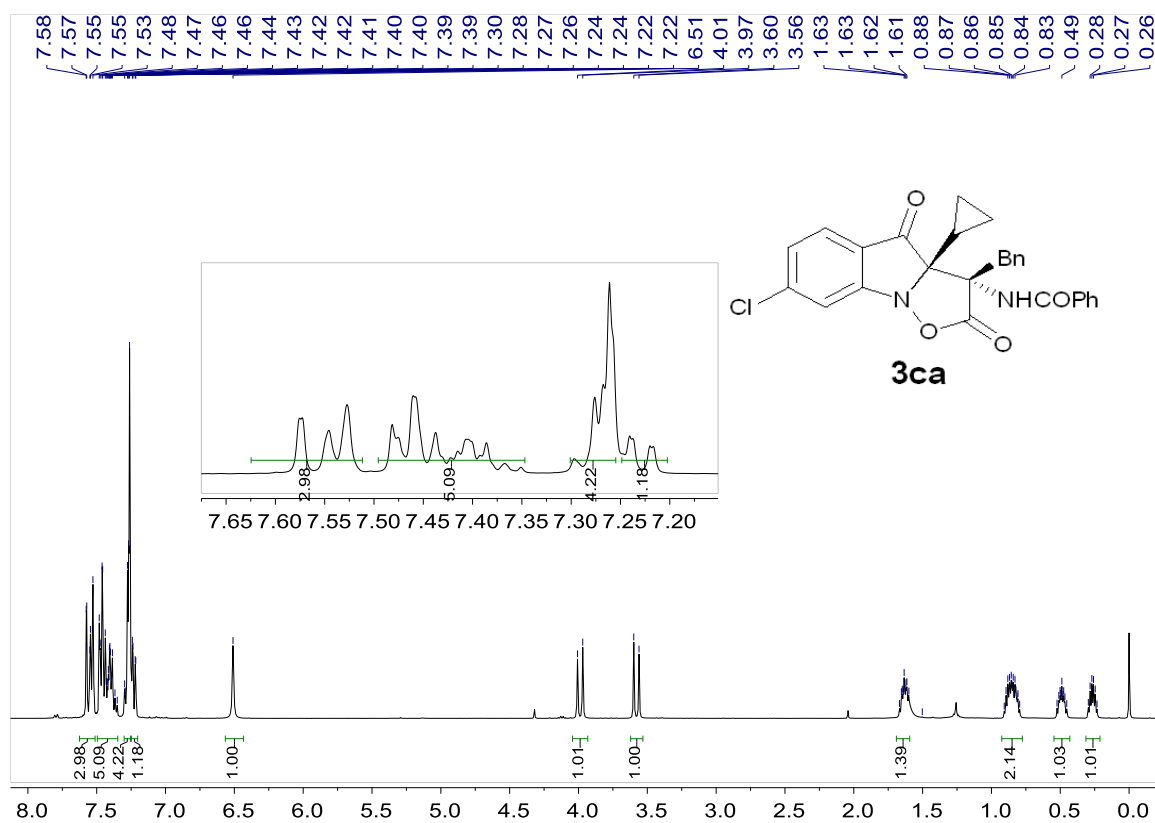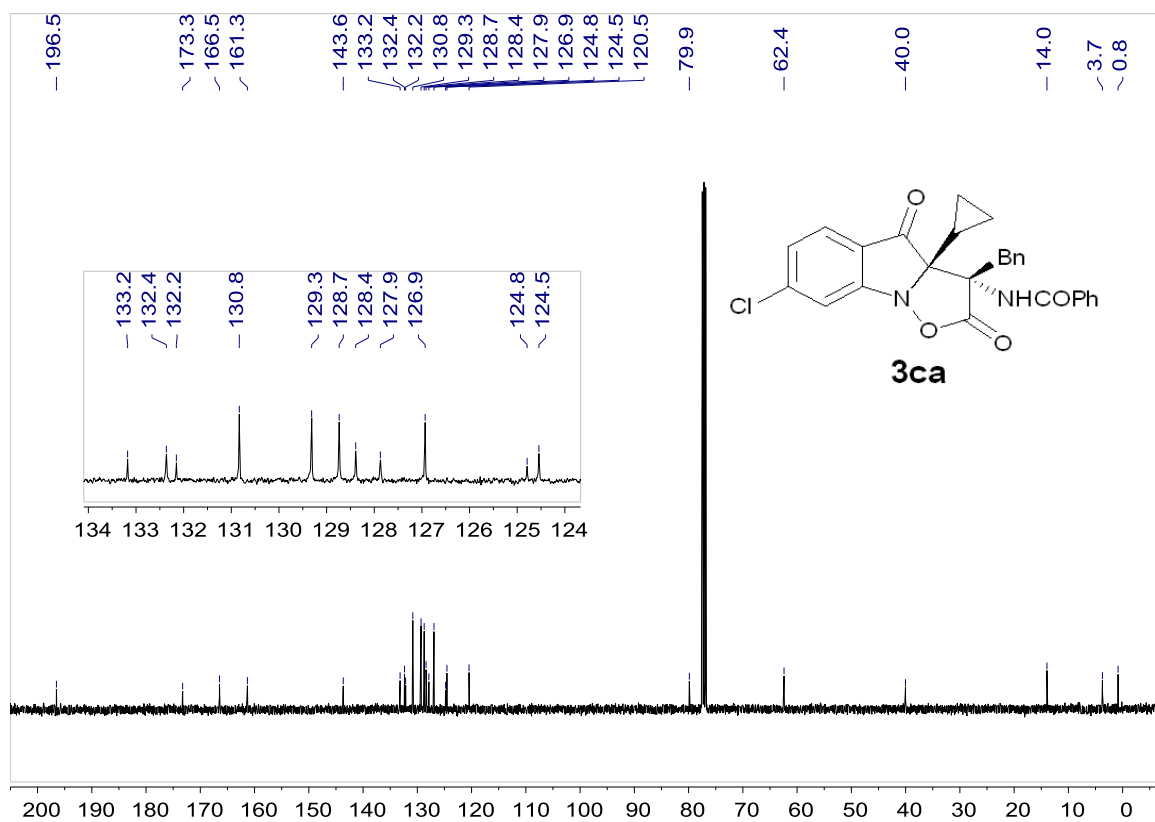

HSQC

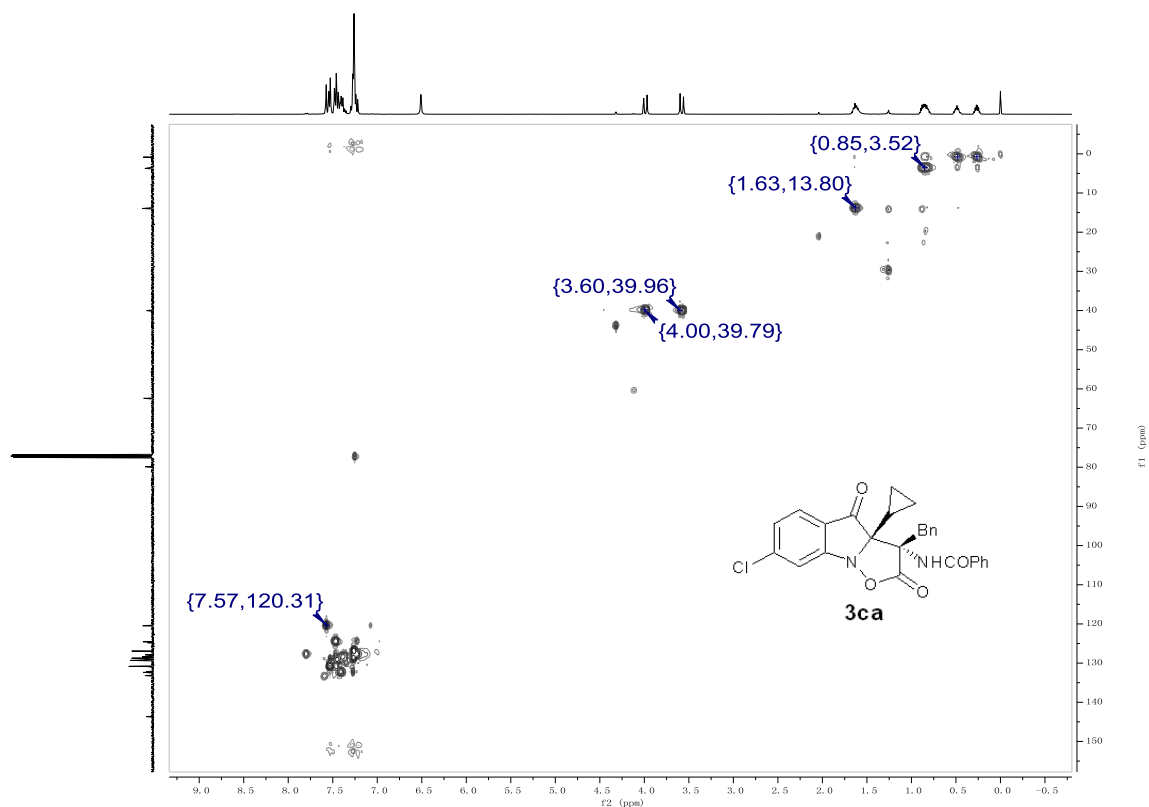

HMBC

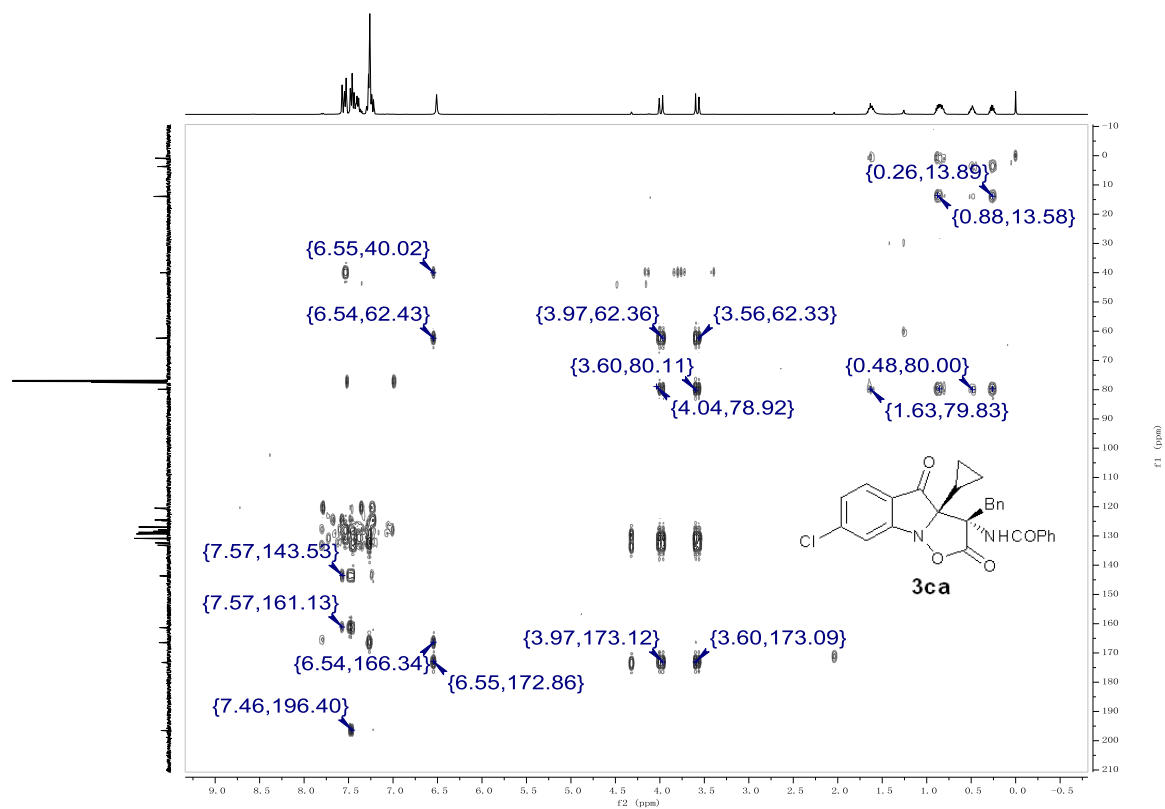

$^1\text{H}$  NMR (400 MHz) and  $^{13}\text{C}\{^1\text{H}\}$  NMR (101 MHz),  $\text{CDCl}_3$ , compound **3da**

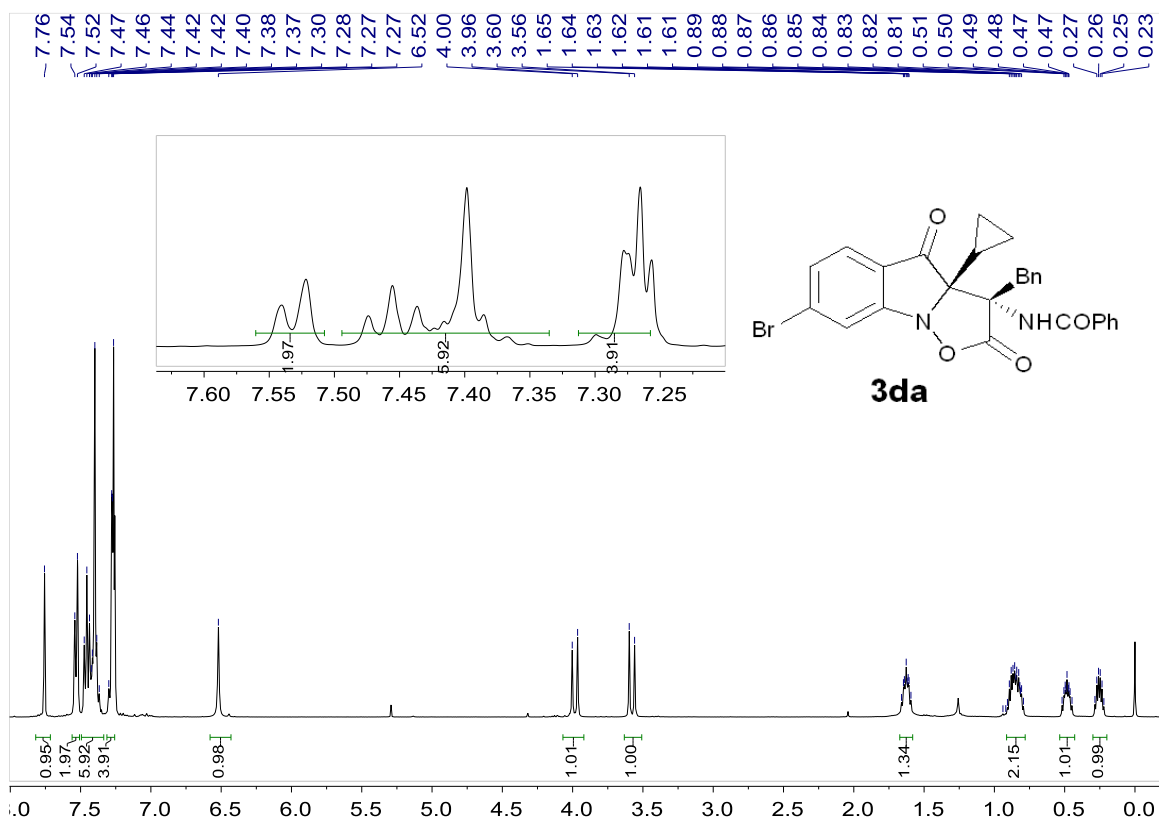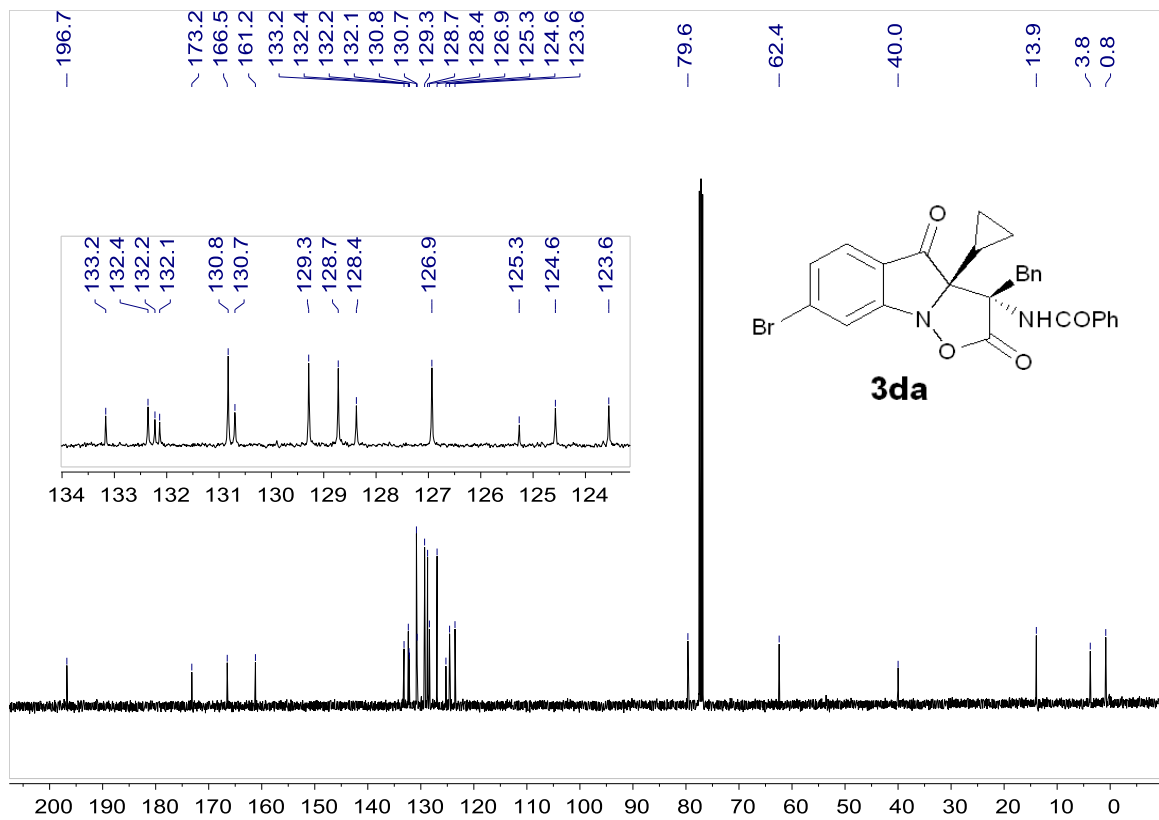

$^1\text{H}$  NMR (400 MHz) and  $^{13}\text{C}\{^1\text{H}\}$  NMR (101 MHz),  $\text{CDCl}_3$ , compound **3ea**

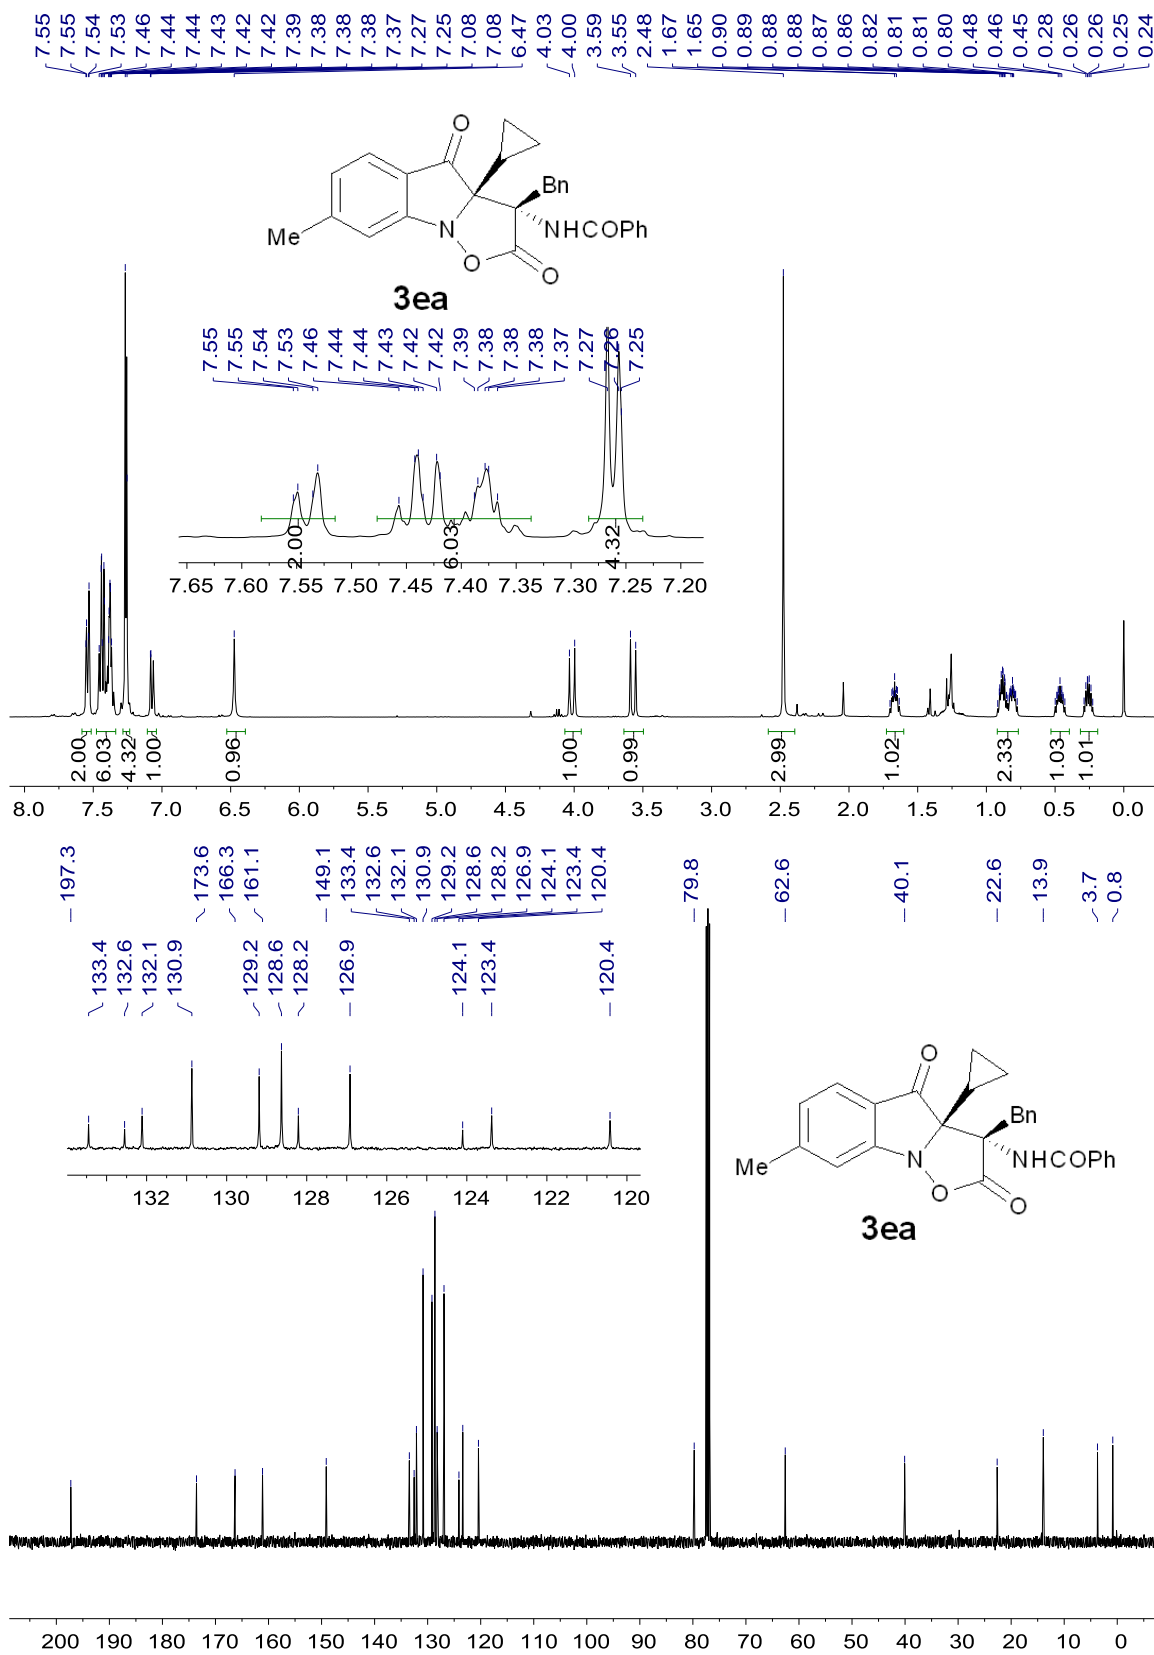



$^1\text{H}$  NMR (400 MHz) and  $^{13}\text{C}$ { $^1\text{H}$ } NMR (101 MHz),  $\text{CDCl}_3$ , compound **3fa**

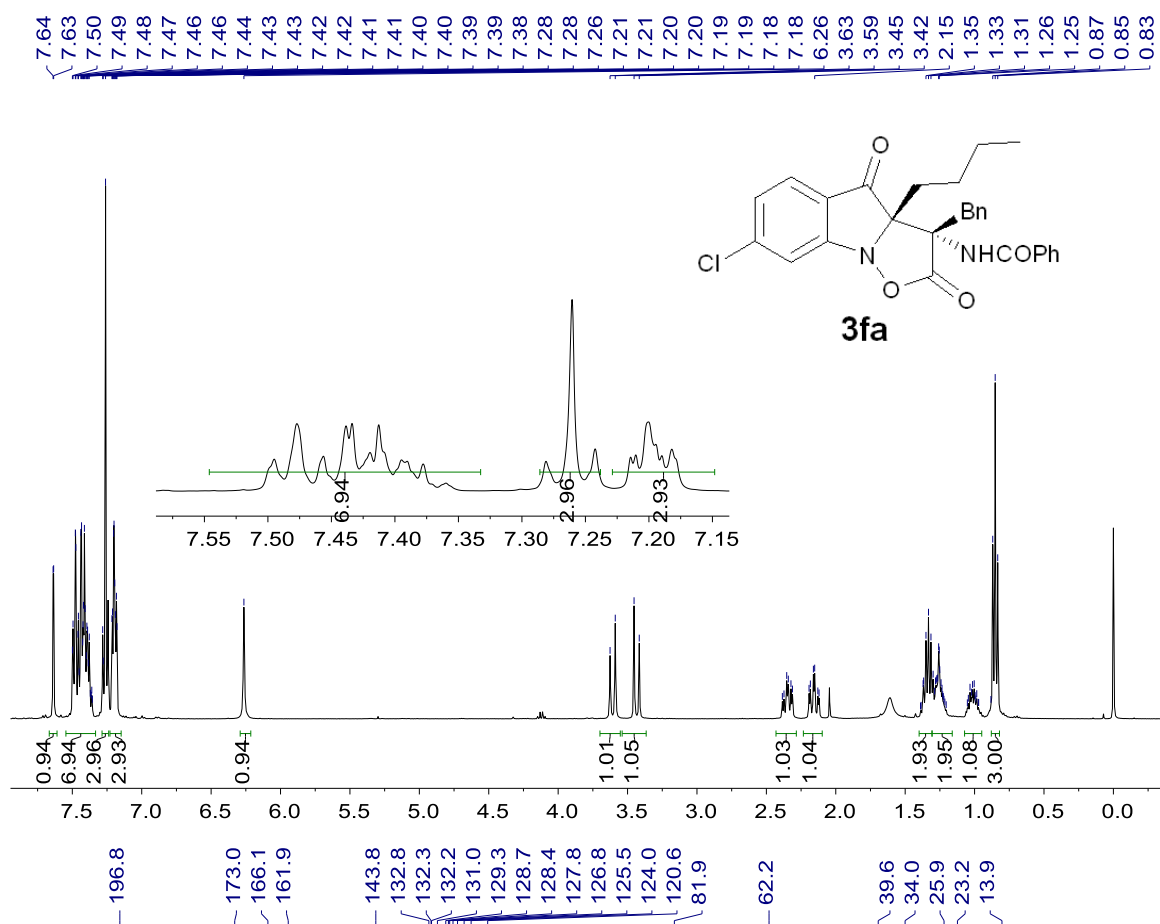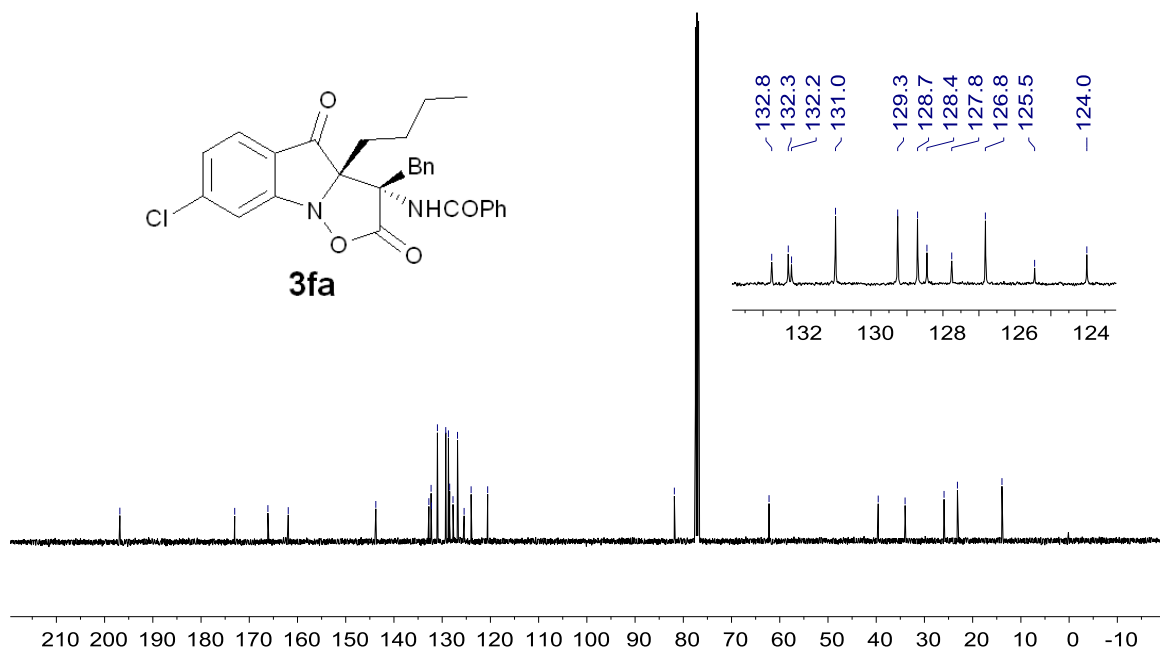

$^1\text{H}$  NMR (400 MHz) and  $^{13}\text{C}\{^1\text{H}\}$  NMR (101 MHz),  $\text{CDCl}_3$ , compound **3ga**

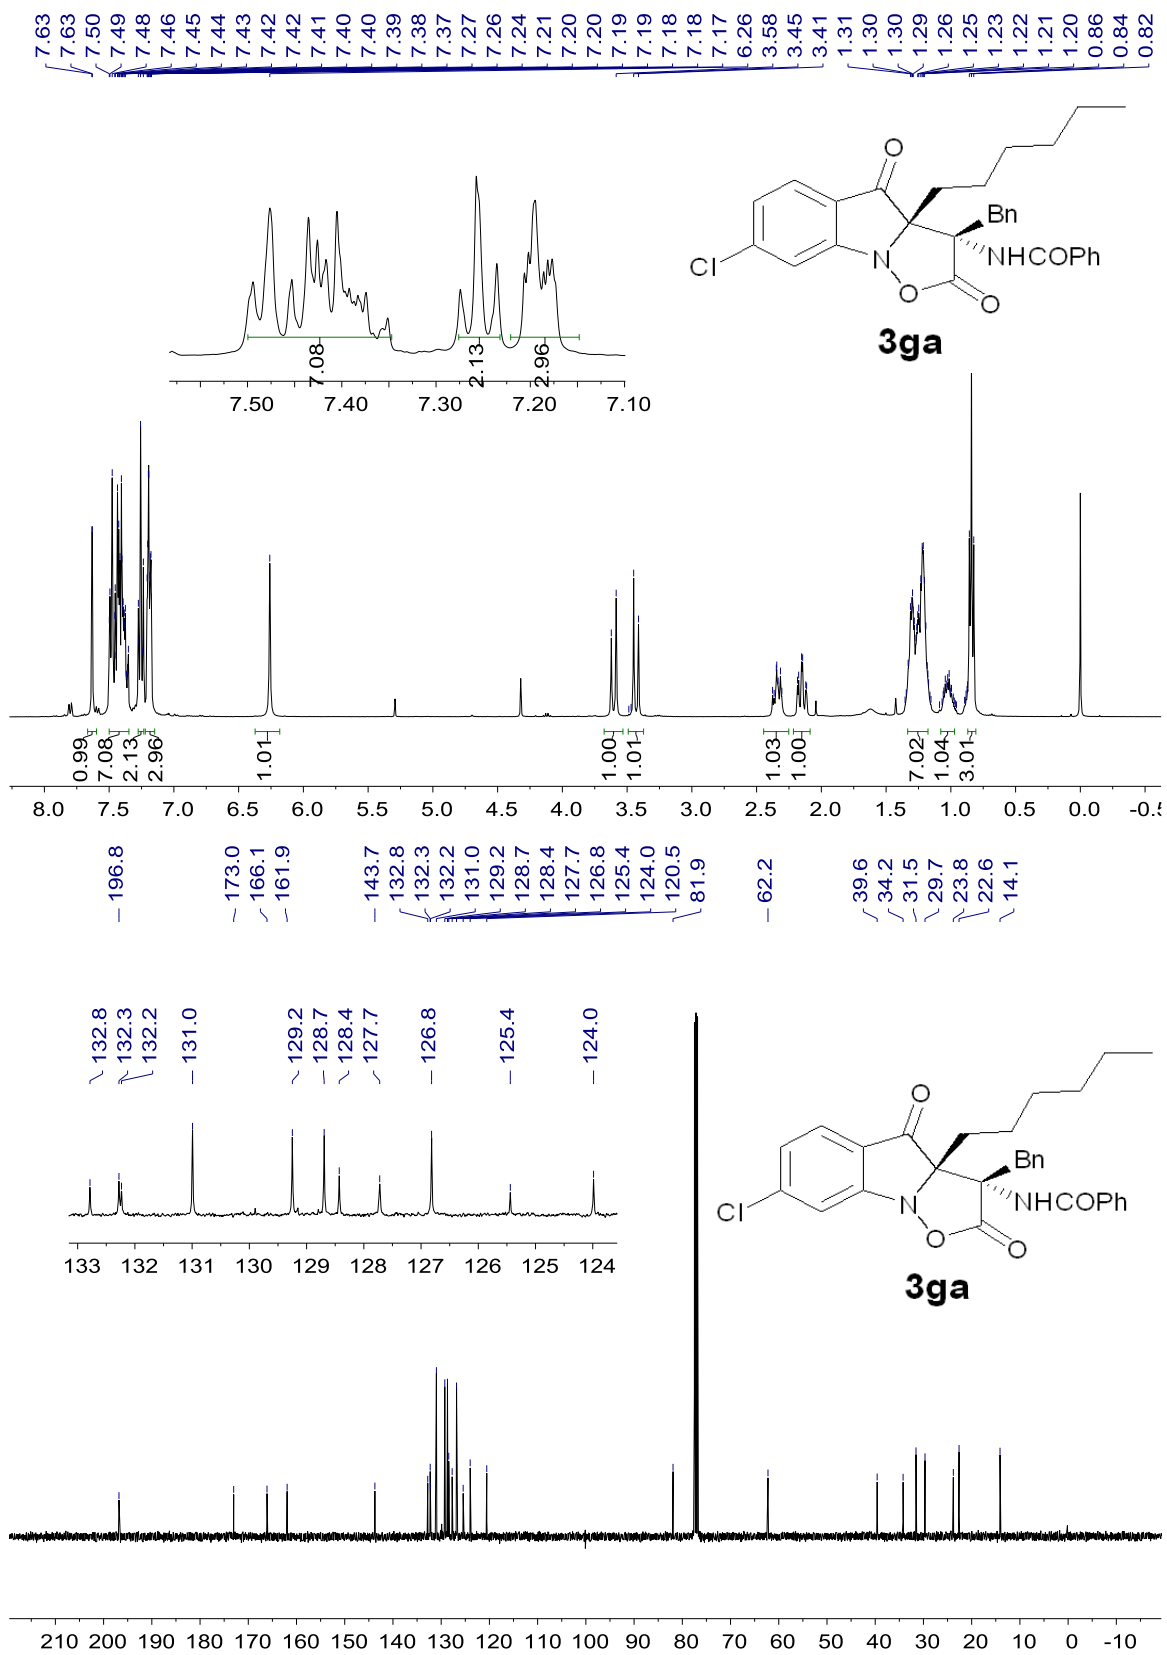

$^1\text{H}$  NMR (400 MHz) and  $^{13}\text{C}$ { $^1\text{H}$ } NMR (101 MHz),  $\text{CDCl}_3$ , compound **3ha**

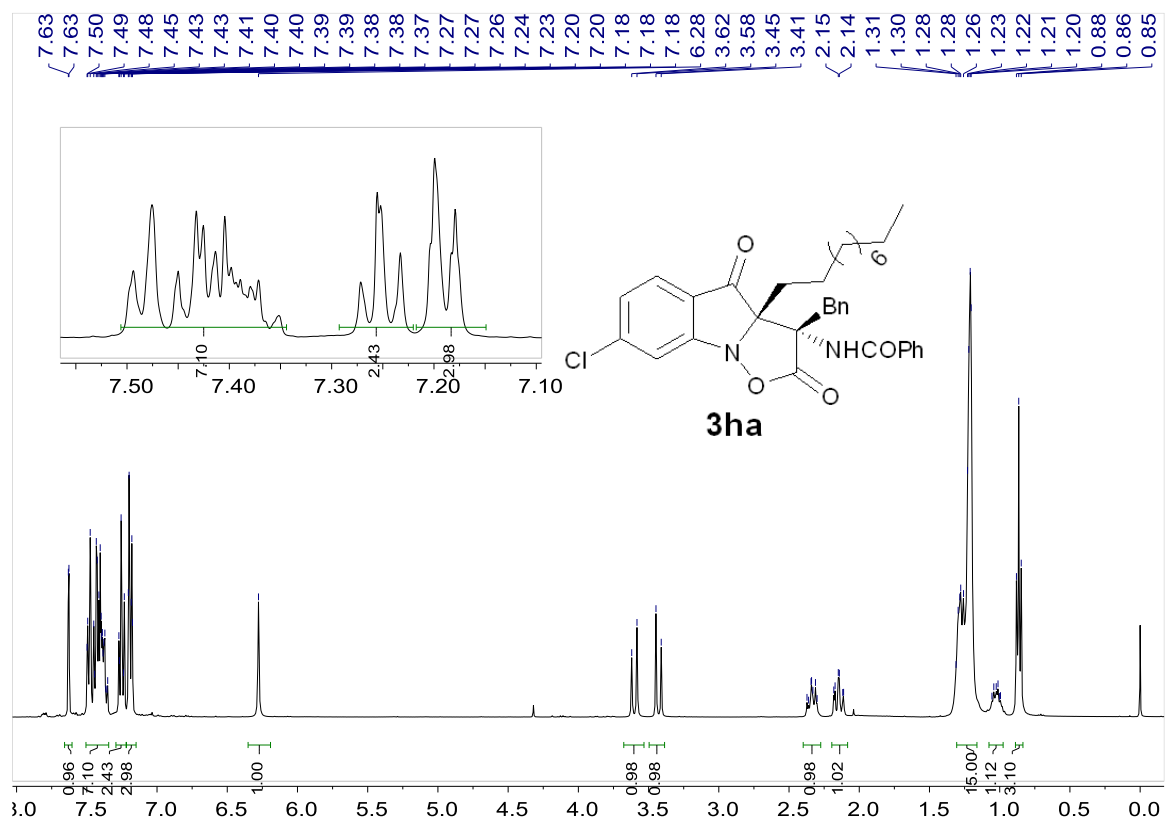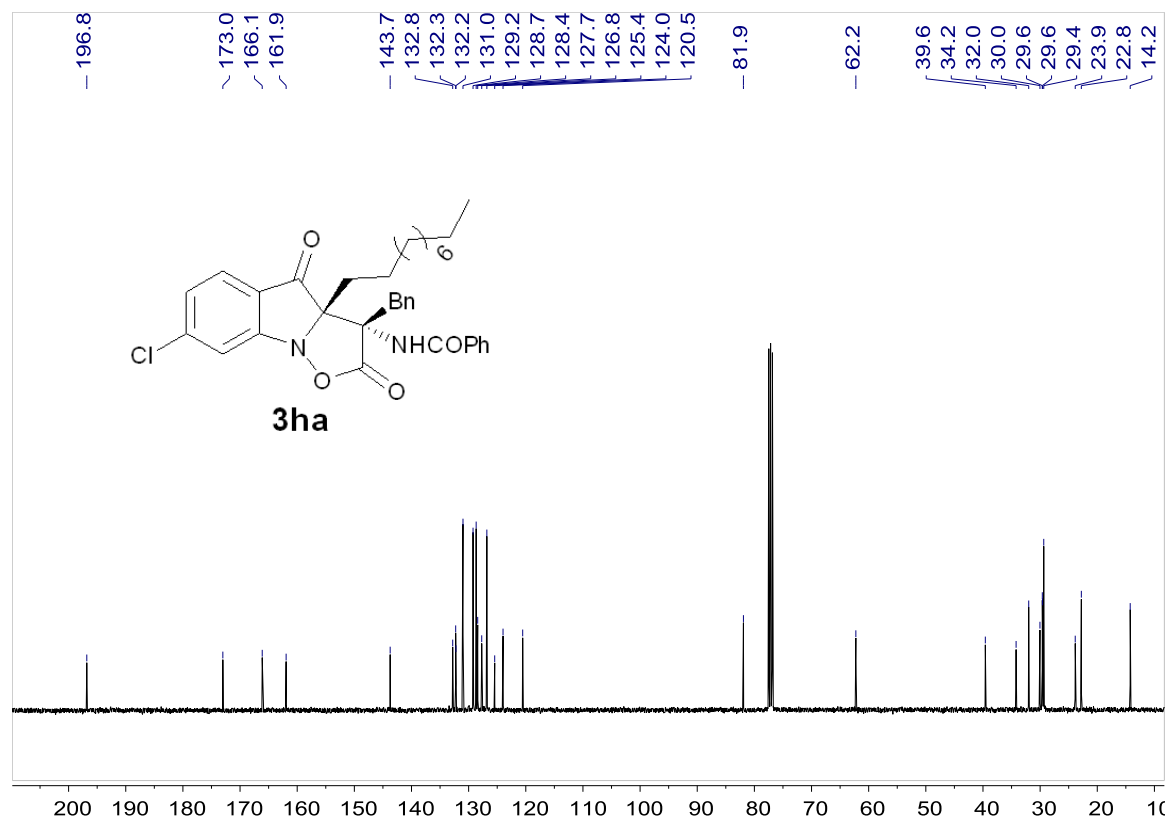

$^1\text{H}$  NMR (400 MHz) and  $^{13}\text{C}\{^1\text{H}\}$  NMR (101 MHz),  $\text{CDCl}_3$ , compound **3ia**

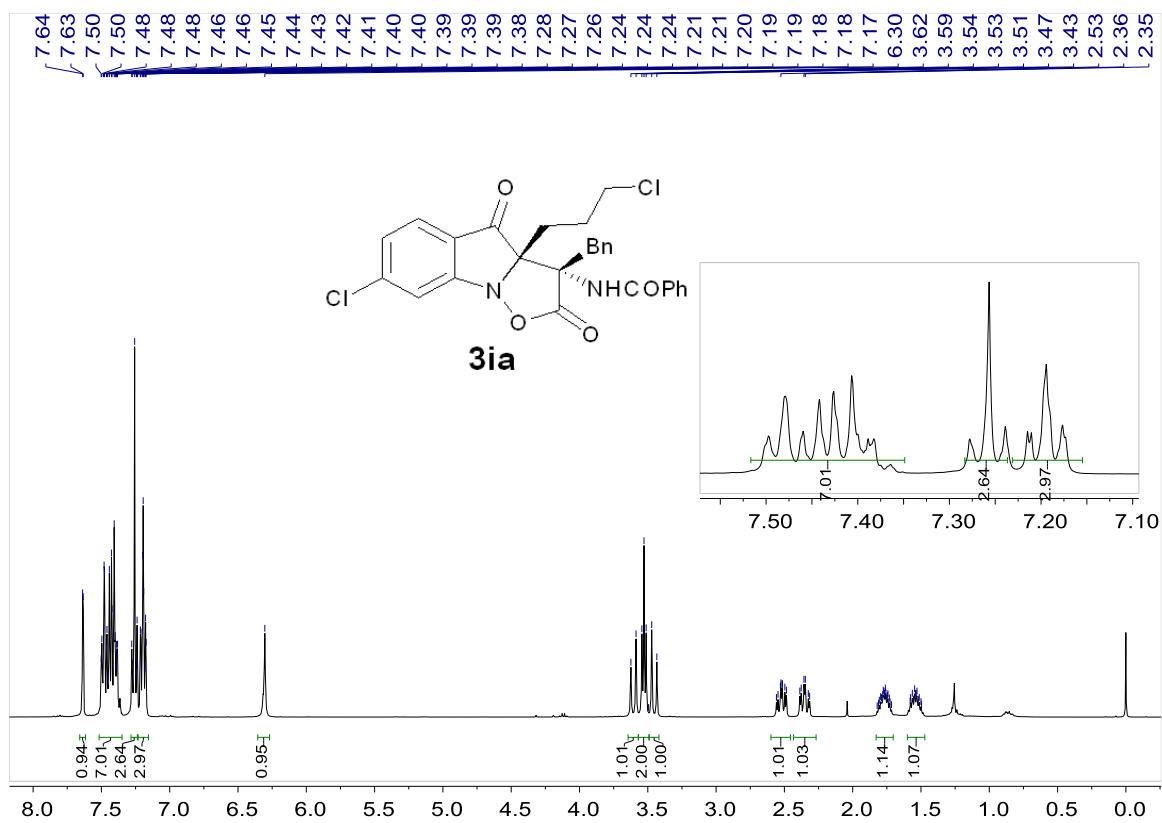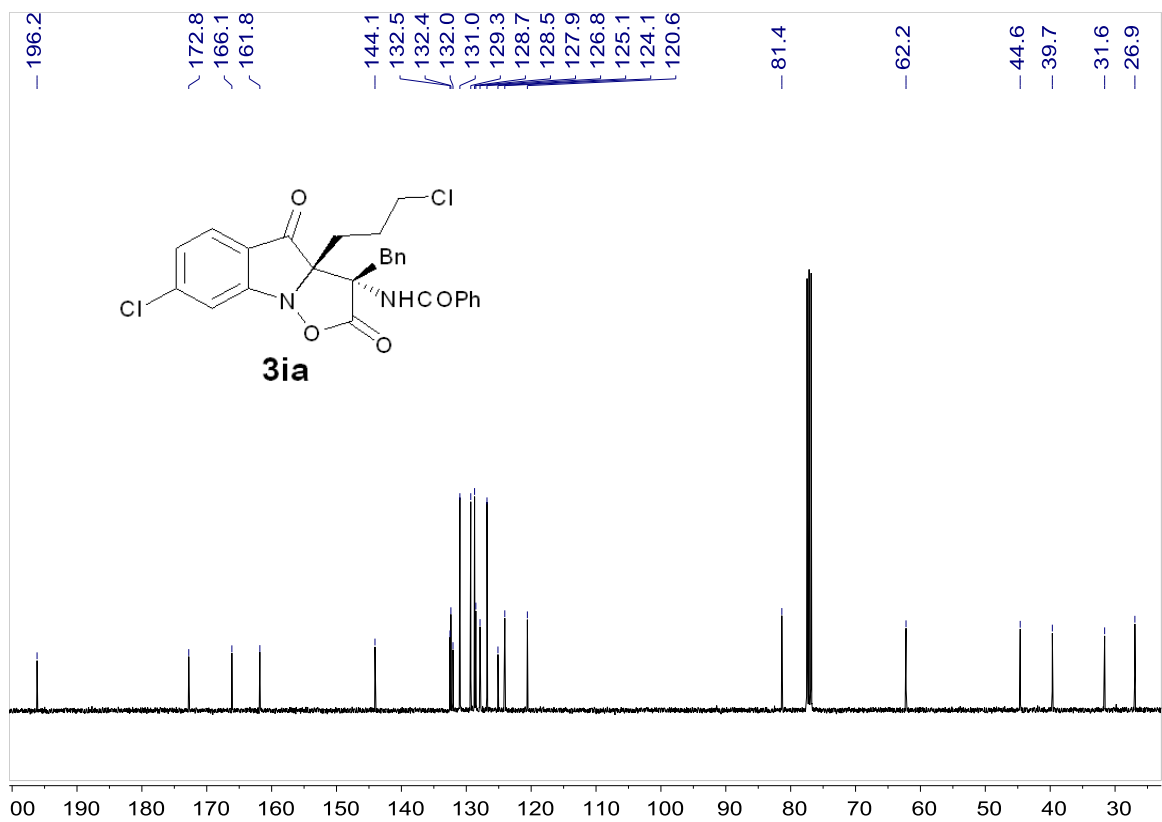

$^1\text{H}$  NMR (400 MHz) and  $^{13}\text{C}\{^1\text{H}\}$  NMR (101 MHz),  $\text{CDCl}_3$ , compound **3ja**

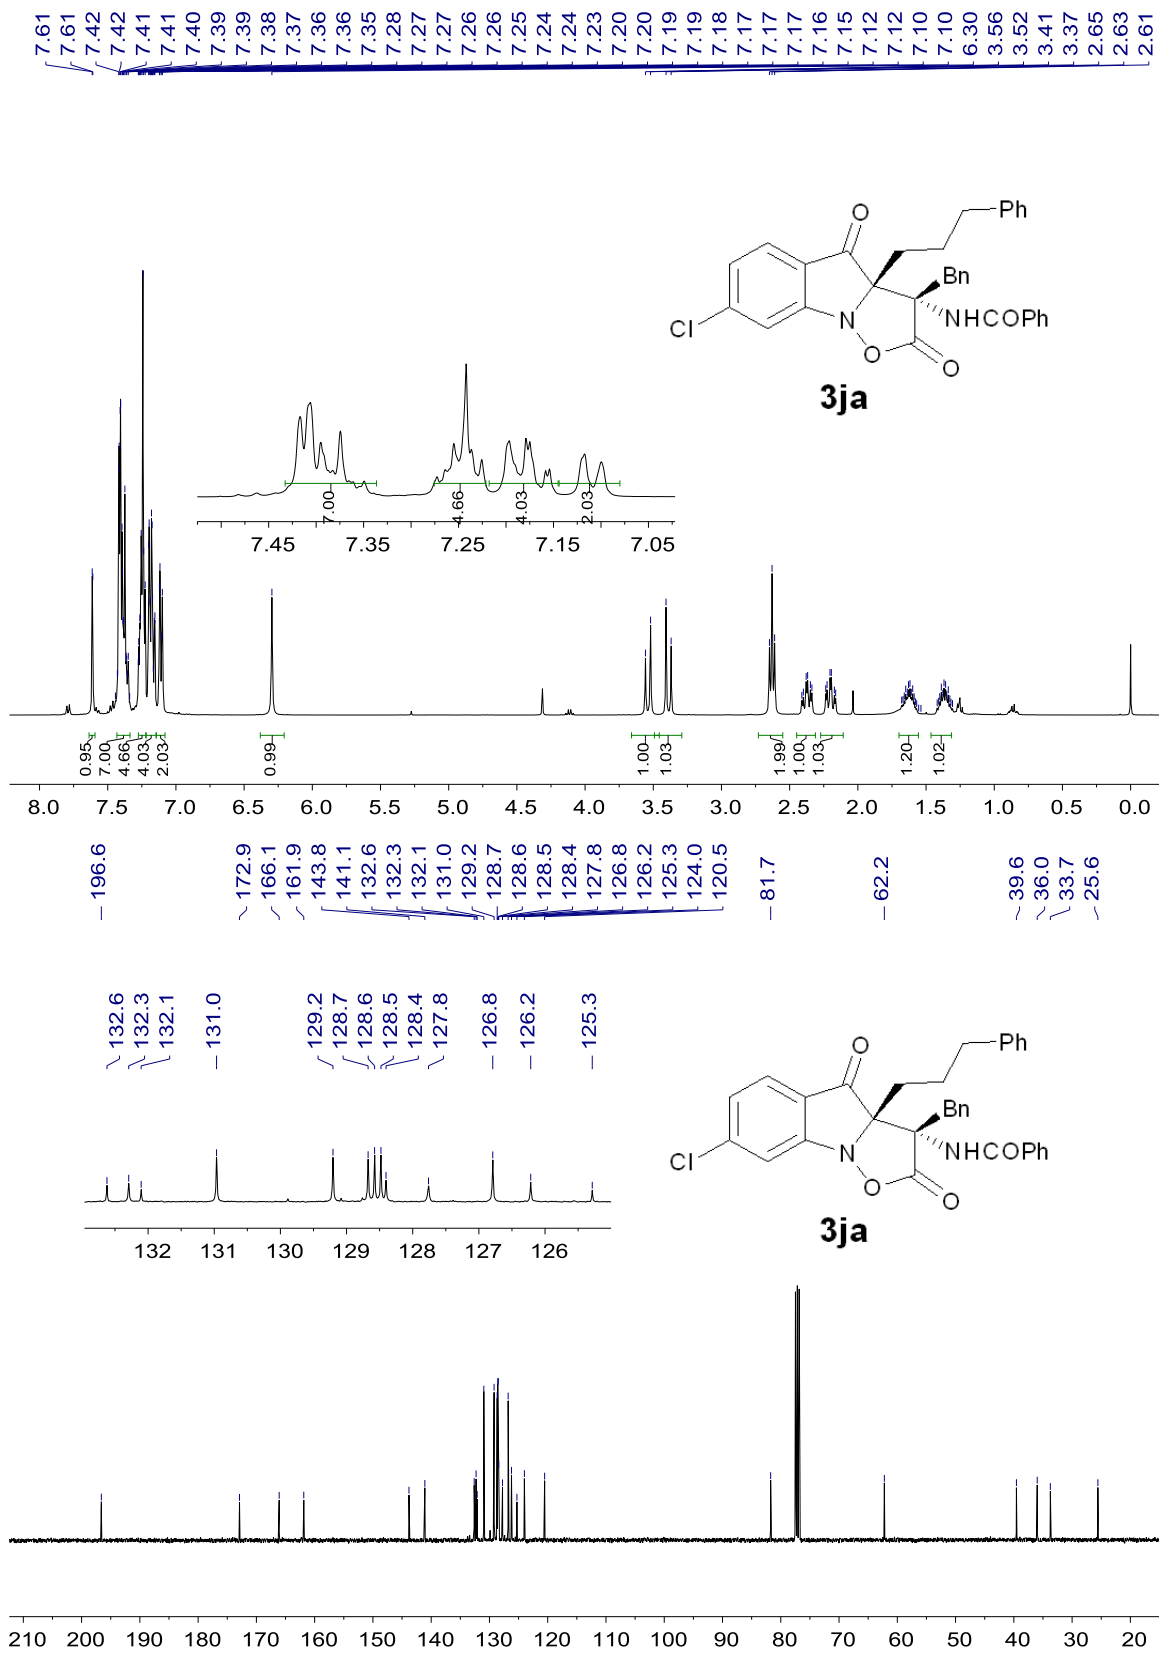

$^1\text{H}$  NMR (400 MHz) and  $^{13}\text{C}$ { $^1\text{H}$ } NMR (101 MHz),  $\text{CDCl}_3$ , compound **3ka**

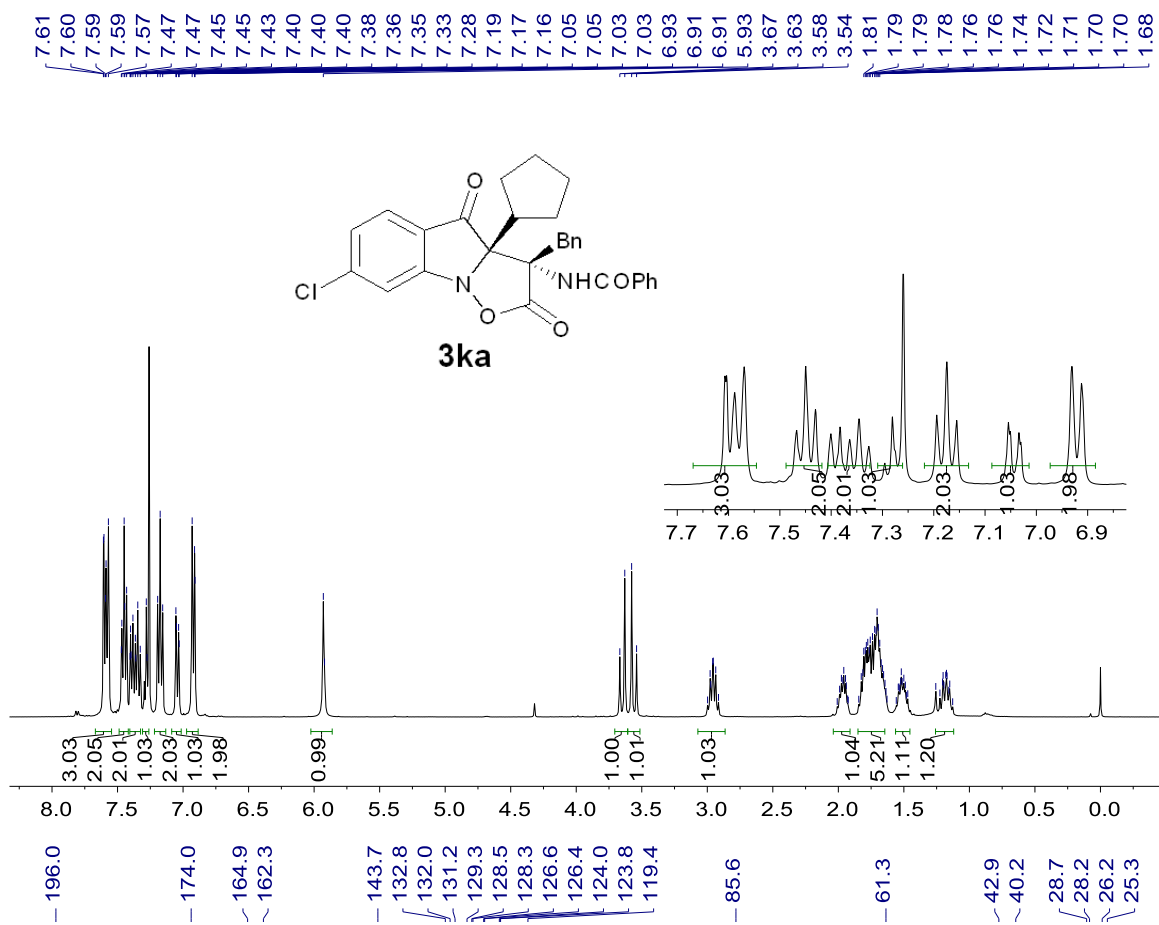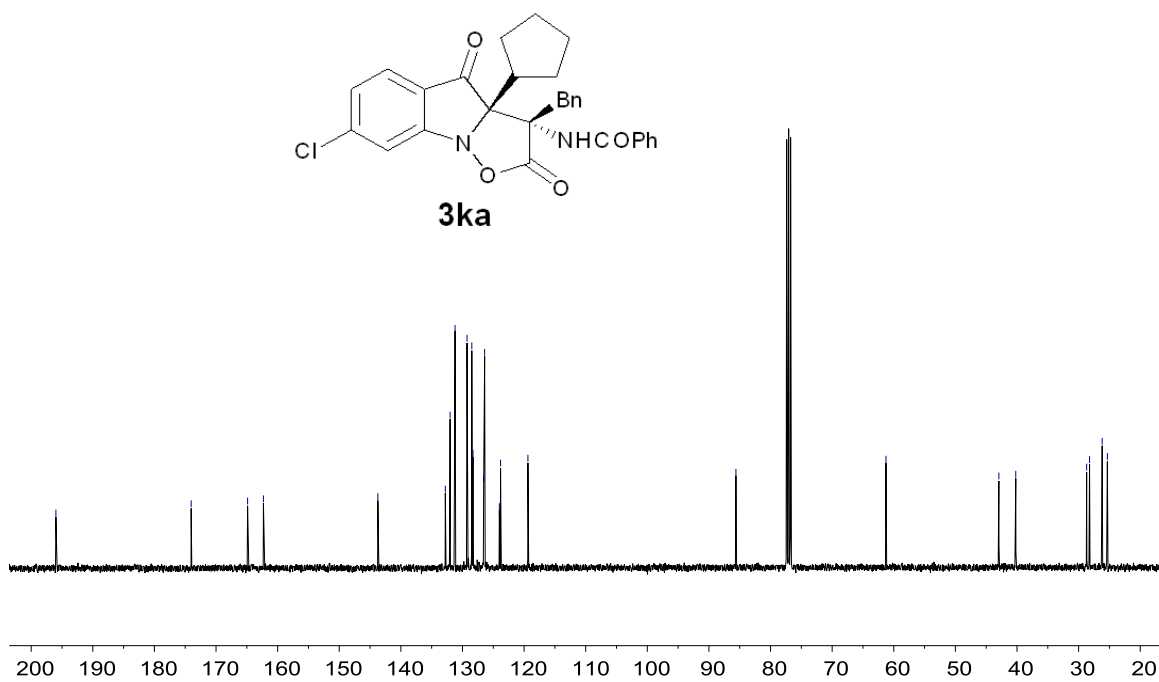

$^1\text{H}$  NMR (400 MHz) and  $^{13}\text{C}\{^1\text{H}\}$  NMR (101 MHz),  $\text{CDCl}_3$ , compound **3la**

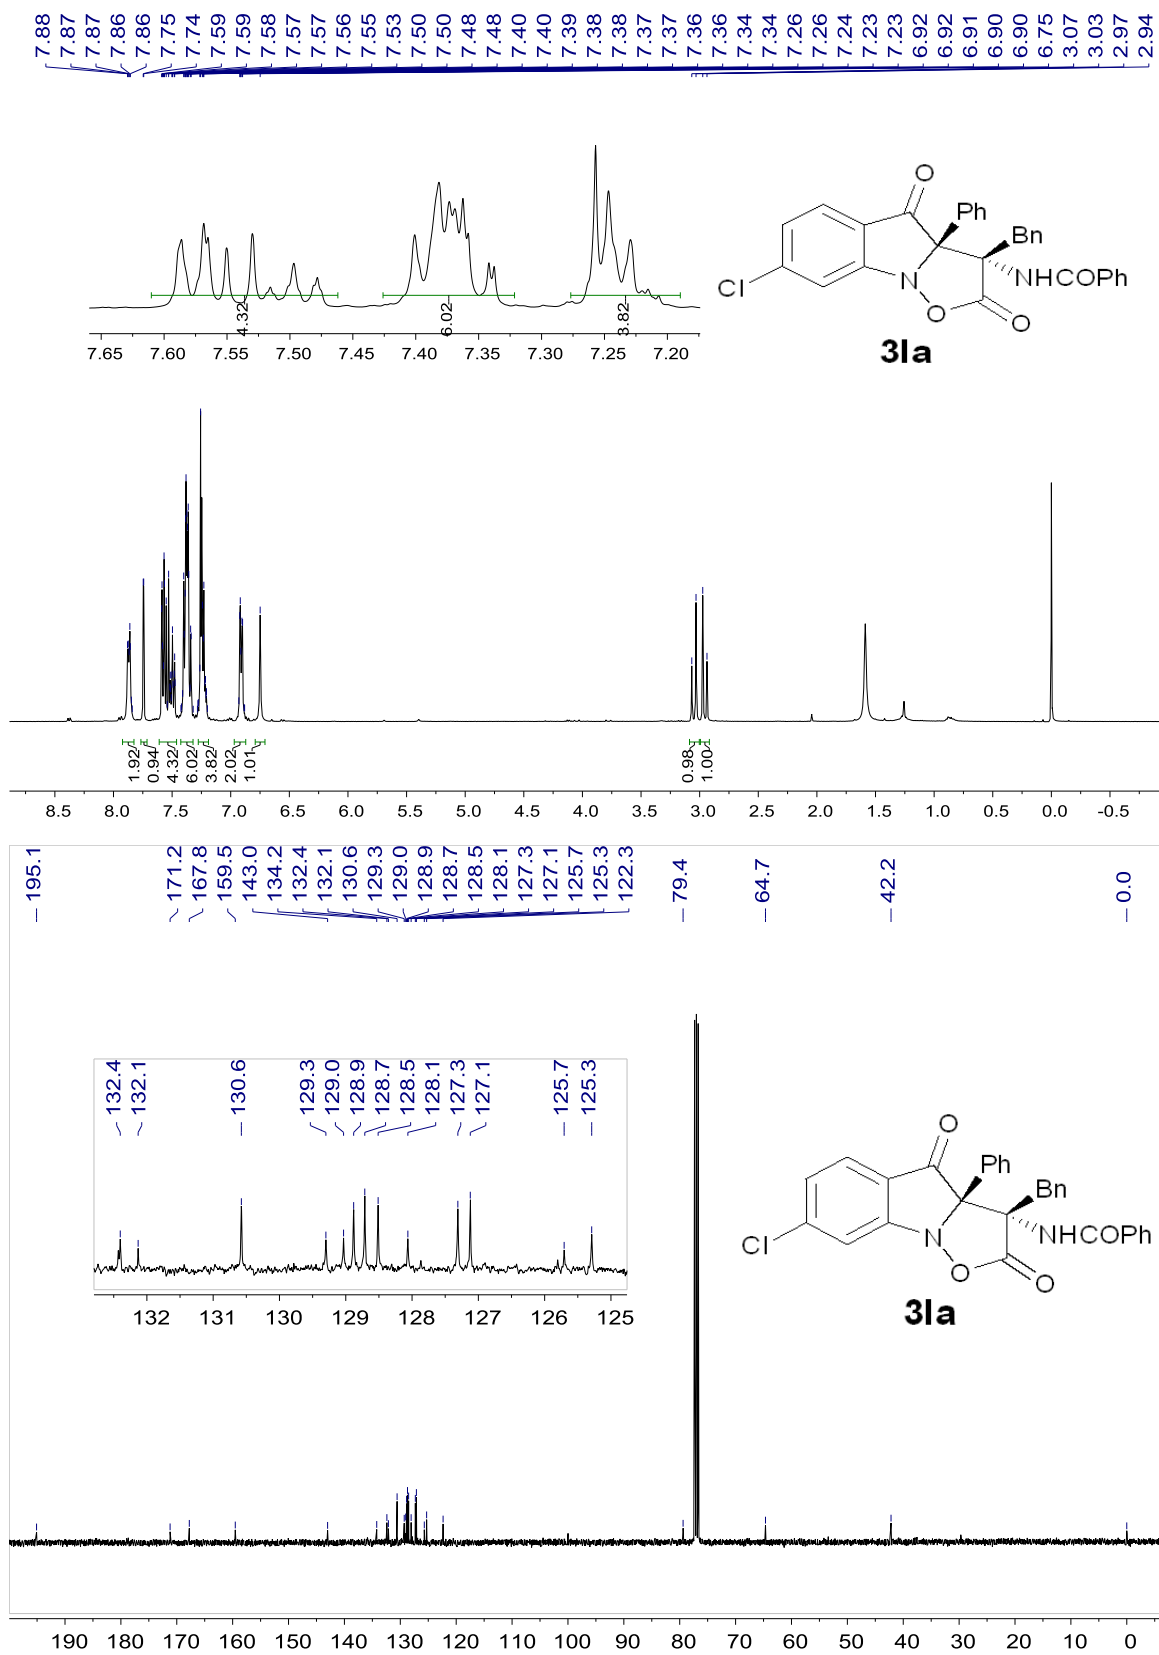

$^1\text{H}$  NMR (400 MHz) and  $^{13}\text{C}\{^1\text{H}\}$  NMR (101 MHz),  $\text{CDCl}_3$ , compound **3ma**

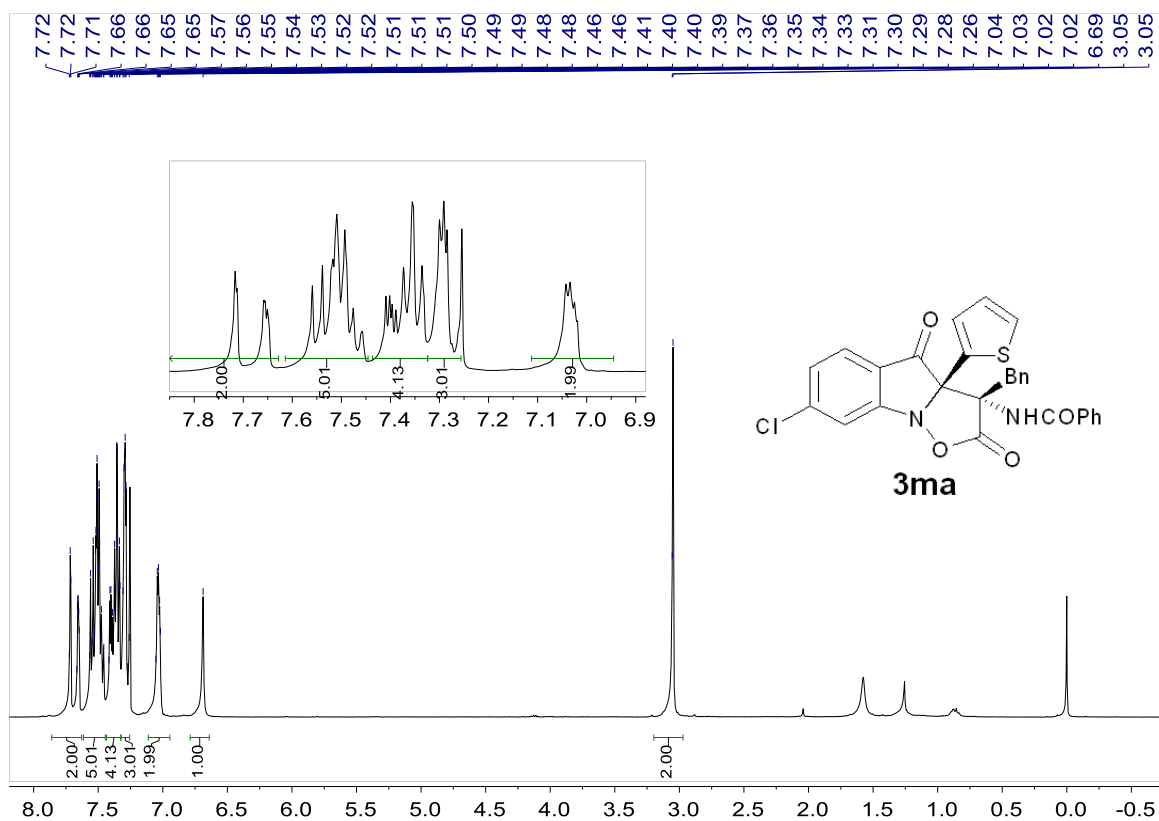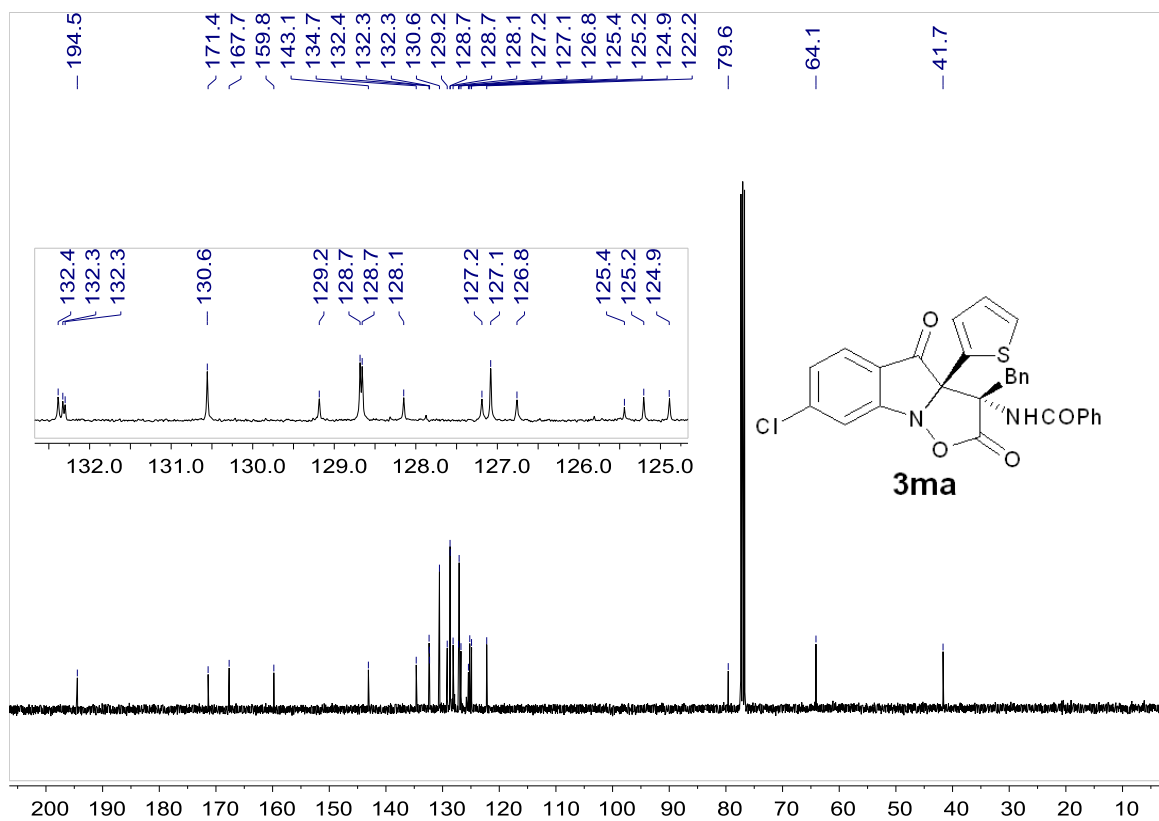



$^1\text{H}$  NMR (400 MHz) and  $^{13}\text{C}\{^1\text{H}\}$  NMR (101 MHz),  $\text{CDCl}_3$ , compound **G-6**

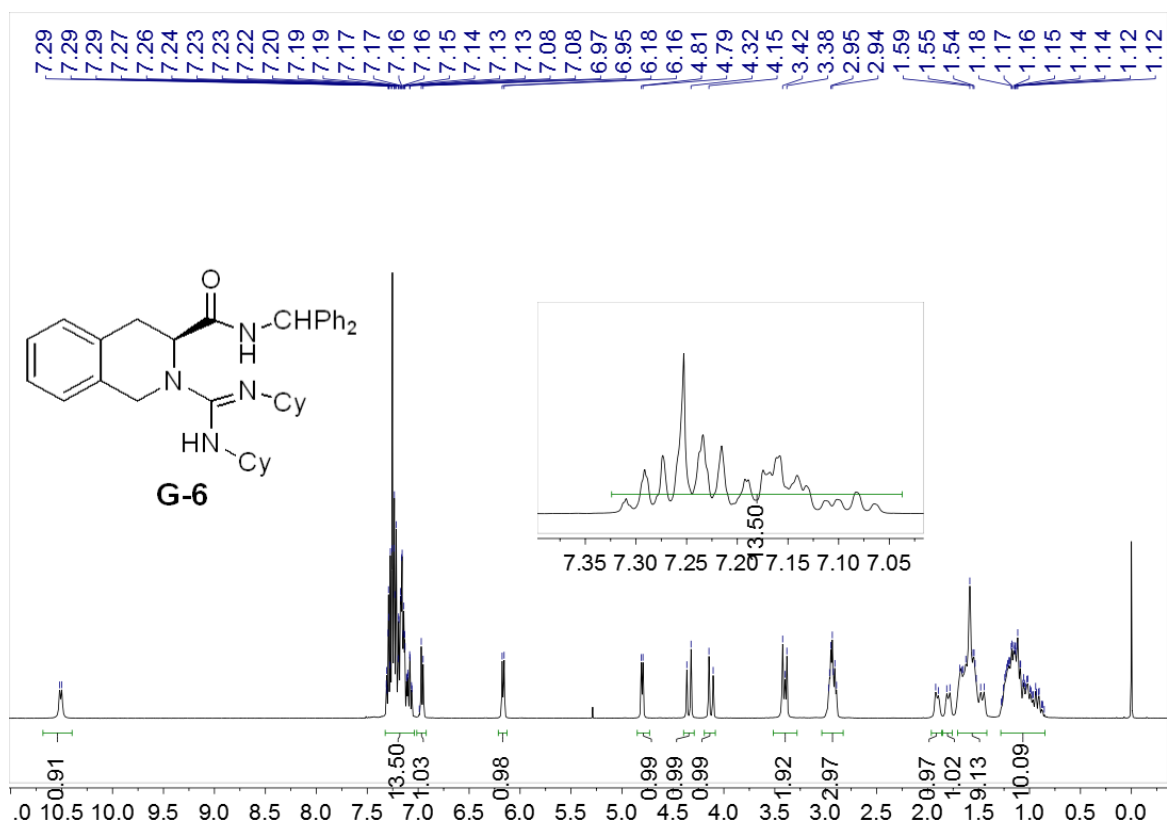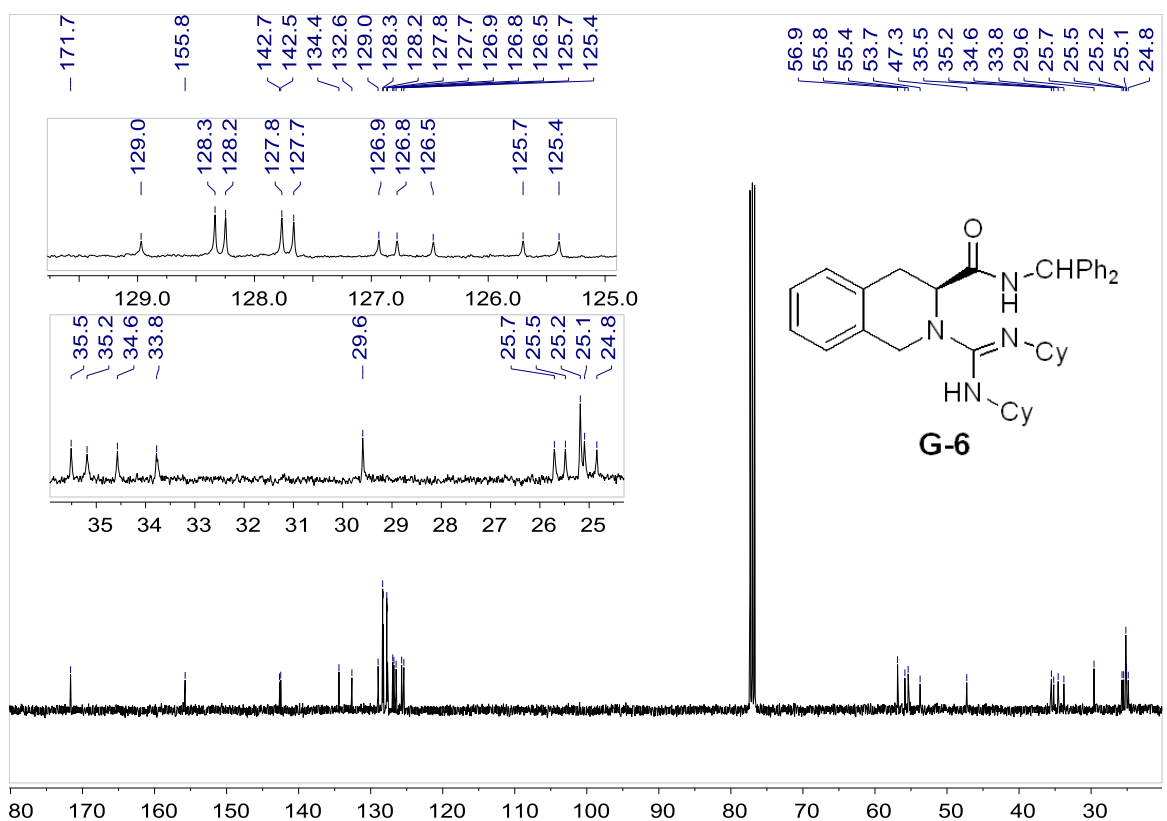

$^1\text{H}$  NMR (400 MHz) and  $^{13}\text{C}\{^1\text{H}\}$  NMR (101 MHz), DMSO, compound **4al**

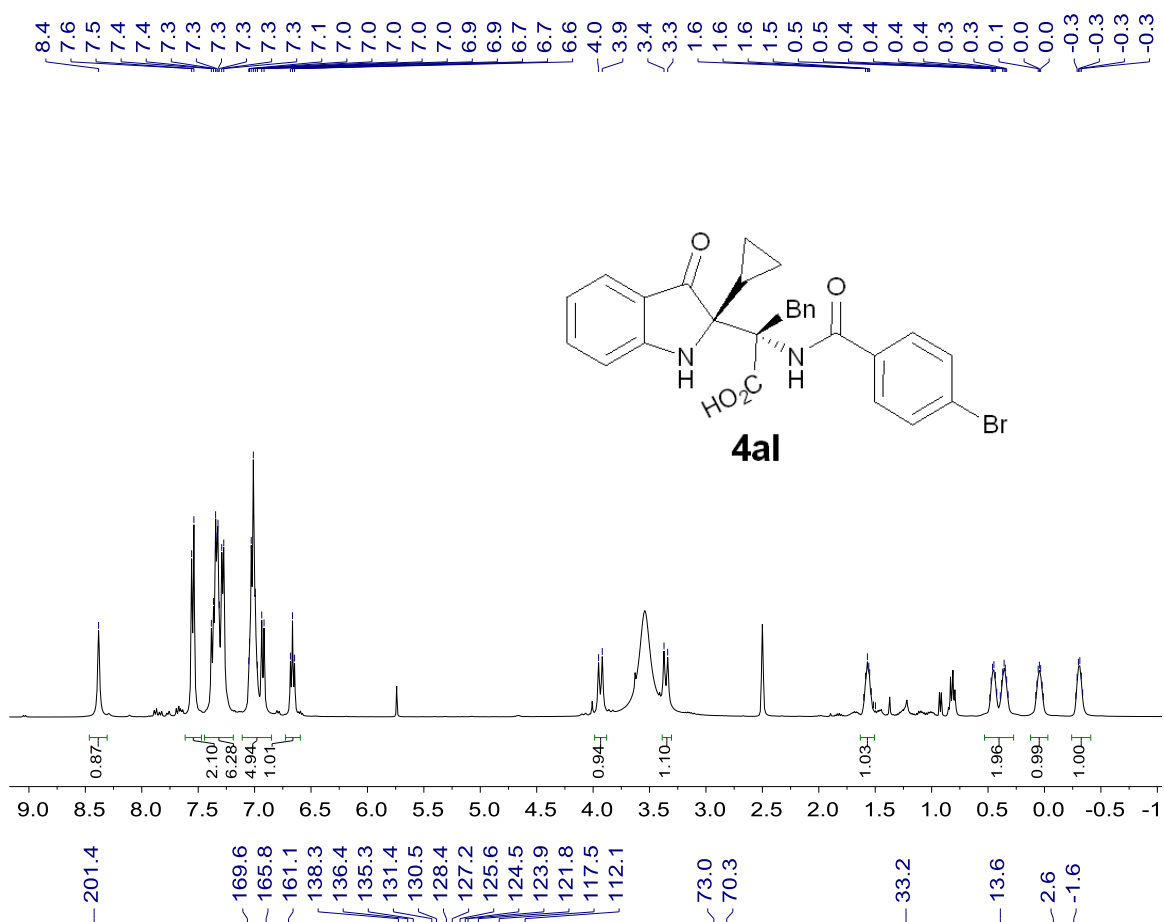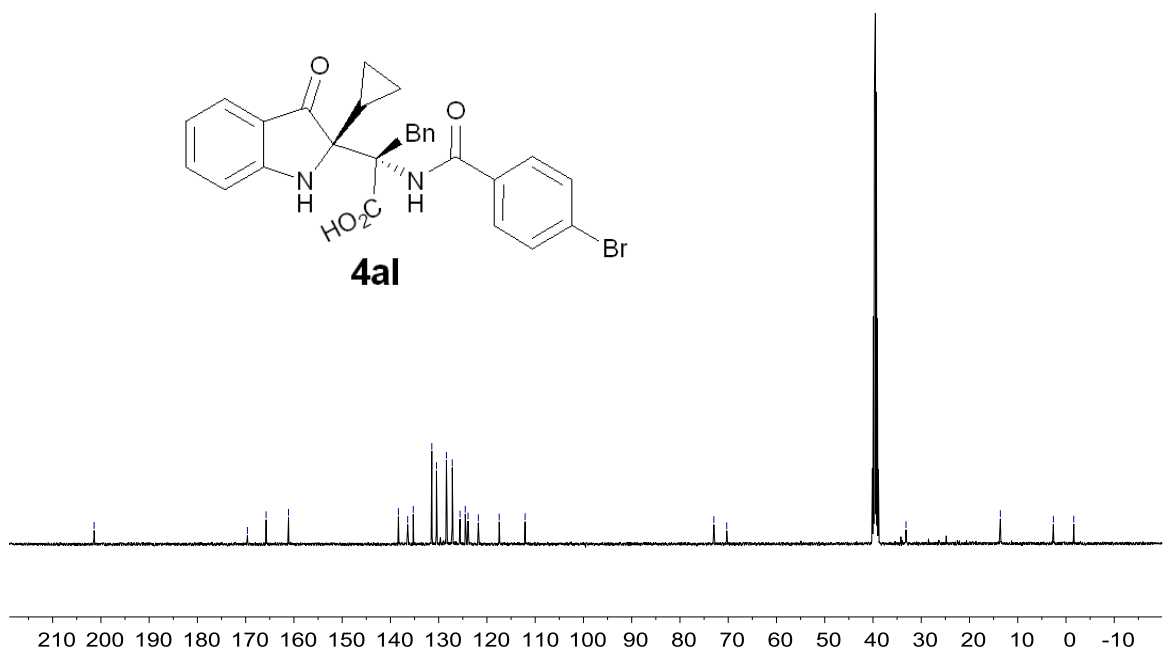

## 9. References

1. (a) S. X. Dong, X. H. Liu, X. H. Chen, F. Mei, Y. L. Zhang, B. Gao, L. L. Lin and X. M. Feng, *J. Am. Chem. Soc.*, 2010, **132**, 10650; (b) K. A. Teegardina and J. D. Weaver, *Chem. Commun.*, 2017, **53**, 4771.
2. C. V. Ramana, P. Patel, K. Vanka, B. Miao, A. Degterev. *Eur. J. Org. Chem.* 2010, 5955.
3. (a) V. B. G é nisson, A-V. Bouniol, F. Nepveu. *Synlett.*, 2001, 700; (b) B. Jeremie, B-G. Vania , F. Vincent, J-P. Souchard, N. Francoise, *Free Radical Research*, 2004, **38**, 459.
4. S. J. Edeson, E. J. M. Maduli, S. Swanson, P. A. Procopiou, J. P. A. Harrity. *Eur. J. Org. Chem.* 2016, 83.
5. I. S. Kovalev, D. S. Kopchuk, G. V. Zyryanov, V. L. Rusinov, O. N. Chupakhin. *Mendeleev Commun.*, 2014, **24**, 40.
6. Z. P. Y, X. H. Liu, L. Zhou, L. L. Lin, X. M. Feng, *Angew. Chem., Int. Ed.*, 2009, **48**, 5195.
